# Supplementary material for: Effect of modulator connectivity on promoting defectivity in titanium–organic frameworks
Source: Royal Society of Chemistry journal article supplement (doi:10.1039/d0sc06105k), 2020-12-23
Supplement: d0sc06105k1.pdf [file d0sc06105k1.pdf]

## Table of contents

|                                                                                                               |    |
|---------------------------------------------------------------------------------------------------------------|----|
| S1. General Experimental Remarks.....                                                                         | 2  |
| S.2. Materials and Synthesis.....                                                                             | 4  |
| S.2.1. General remarks .....                                                                                  | 4  |
| S.2.2. High Throughput Synthetic protocols .....                                                              | 4  |
| S.3. Optimization of the synthesis of defect-free MUV-10 phases.....                                          | 7  |
| S.4. Scope of synthetic conditions used to explore defect engineering of MUV-10. ....                         | 16 |
| S.5. Defect incorporation in conditions adequate for MUV-10 formation: characterization of MUV-10 mod%-H..... | 17 |
| S.5.1 Incorporation of modulators in MUV-10 iso%-H and benzo%-H as estimated with <sup>1</sup> H-NMR.....     | 17 |
| S.5.2 FT-IR of MUV-10 mod%-H.....                                                                             | 18 |
| S.5.3. Molar per cent of metals in MUV-10 iso%-H and benzo%-H .....                                           | 22 |
| S.5.4. Thermo Gravimetric Analysis MUV-10 iso%-H and benzo%-H.....                                            | 23 |
| S.5.4.1 Thermo Gravimetric Analysis of iso%-H series.....                                                     | 23 |
| S.5.4.2 Thermo Gravimetric Analysis of benzo%-H series.....                                                   | 32 |
| S.5.5. Computational simulations of defective MUV-10 phases.....                                              | 35 |
| S.5.5.1 Defect energetics .....                                                                               | 35 |
| S.6. MUV-10 modulation in linker deficient conditions: characterization of MUV-10 iso%-L samples. ....        | 36 |
| S.6.1 PXRD of MUV-10 iso%-L.....                                                                              | 36 |
| S.6.2 Incorporation of modulators in MUV-10 iso%-L as estimated with <sup>1</sup> H-NMR. ....                 | 36 |
| S.6.3 FT-IR of MUV-10 iso%-L.....                                                                             | 37 |
| S.6.4. Molar per cent of metals in MUV-10 iso%-L .....                                                        | 38 |
| S.6.5. Thermo Gravimetric Analysis of MUV-10 iso%-L.....                                                      | 39 |
| S.7. MUV-10 modulation in linker deficient conditions: characterization of MUV-10 benzo%-L samples. ....      | 43 |
| S.7.1 PXRD of MUV-10 benzo%-L.....                                                                            | 43 |
| S.7.2 Incorporation of modulators in MUV-10 benzo%-L as estimated with <sup>1</sup> H-NMR. ....               | 43 |
| S.7.3 FT-IR of MUV-10 benzo%-L.....                                                                           | 44 |
| S.7.4. Molar per cent of metals in MUV-10 benzo%-L .....                                                      | 44 |
| S.7.5. Thermo Gravimetric Analysis MUV-10 benzo%-L series .....                                               | 45 |
| S.8. Effect of modulation in the properties of MUV-10 H defective phases.....                                 | 48 |
| S.8.1. Morphology and particle size of iso%-H series.....                                                     | 48 |
| S.8.1. Morphology and particle size of benzo%-H series.....                                                   | 51 |
| S.8.2. Water stability of iso% and benzo%-H series for most defective samples. ....                           | 54 |

|                                                                                                     |    |
|-----------------------------------------------------------------------------------------------------|----|
| S.8.3. Effect of defectivity in the dispersability of the samples in water and dichloromethane..... | 55 |
| S.8.4. Analysis of the porosity of iso% and benzo%-H series .....                                   | 59 |
| S.9. Effect of modulation in the properties of MUV-10 L defective phases .....                      | 61 |
| S.9.1. Morphology and particle size of iso and benzo%-L series. ....                                | 61 |
| S.9.2. Water stability of iso% and benzo%-L series.....                                             | 67 |
| S.9.3. Analysis of the porosity of iso% and benzo%-L series.....                                    | 69 |
| S.10 Comparison of thermal Stability .....                                                          | 72 |
| S.11 Electronic structure.....                                                                      | 73 |

## S1. General Experimental Remarks

**Powder X-Ray Diffraction (PXRD):** PXRD patterns were collected in a PANalytical X'Pert PRO diffractometer using copper radiation ( $\text{Cu K}\alpha = 1.5418 \text{ \AA}$ ) with an X'Celerator detector, operating at 40 mA and 45 kV. Profiles were collected in the  $3^\circ < 2\theta < 40^\circ$  range with a step size of  $0.017^\circ$ .

**Thermogravimetric Analysis (TGA):** were carried out with a Mettler Toledo TGA/SDTA 851 apparatus between 25 and  $800^\circ\text{C}$  under ambient conditions ( $10^\circ\text{C}\cdot\text{min}^{-1}$  scan rate and an air flow of  $9 \text{ mL}\cdot\text{min}^{-1}$ ).

**Nuclear Magnetic Resonance Spectroscopy (NMR):** NMR spectra were recorded on a Bruker AVIII 300 MHz spectrometer and referenced to residual solvent peaks.

**Gas Uptake:**  $\text{N}_2$  adsorption isotherms were carried out at 77 K on a with a Micromeritics 3Flex gas sorption analyser. Samples were degassed under vacuum at  $120^\circ\text{C}$  for 24 h in a Multisorb station prior to analysis. BET surface areas, micropore surface areas and external surface areas were calculated from the isotherms using the MicroActive operating software. The pore size distributions were calculated using Cylindrical pore oxide surface (QSDT) pore model within the MicroActive software, applying a regularisation of  $10^{-2}$ .

**Scanning Electron Microscopy (SEM) and single point energy-dispersive X-Ray analysis (EDX):** particle morphologies, dimensions and mapping were studied with a Hitachi S-4800 scanning electron microscope at an accelerating voltage of 20 kV, over metalized samples with a mixture of gold and palladium during 90 seconds.

**Fourier Transform Infrared Spectroscopy:** IR spectra of solids were collected using a Shimadzu Fourier Transform Infrared Spectrometer, FTIR-8400S, fitted with a Diamond ATR unit.

**Inductively Coupled Plasma-Mass Spectrometry:** Metal content analyses were carried on an Agilent ICP-MS 7900 apparatus.

**Dynamic Light Scattering:** Colloidal analysis was performed by Dynamic Light Scattering (DLS) with a Zetasizer Ultra potential analyser equipped with Non-Invasive Backscatter optics (NIBS) and a 50 mW laser at 633 nm. (University of Valencia).

**Density Functional Theory (DFT) Computational Calculations:** All periodic DFT calculations have been performed employing Perdew–Burke–Ernzerhof (PBE)<sup>1</sup> functional as implemented in the Vienna ab Initio Simulation Package (VASP)<sup>2,3</sup> using

GW PAW potentials <sup>4</sup> and a 500 eV plane wave cutoff basis set. The  $\Gamma$ -point was used to sample the Brillouin zone and the dispersion energy corrections of the TS method <sup>5</sup> were computed using the Barcelona Supercomputing Center, part of the Spanish Supercomputing Network. The total DOS and the electronic band structure of the crystalline solids were calculated by using the screened hybrid functional of Heyd, Scuseria, and Ernzerhof (HSE06).<sup>6</sup> The electron energies were aligned to the vacuum level using a procedure reported by Butler and co-workers.<sup>7</sup>

**Theoretical Pore Size Distribution:** Pore size for each configuration was simulated using Zeo++ (chan\_radiious=probe\_ratiuous=0.8 and num\_samples=2000).<sup>8</sup>

## S.2. Materials and Synthesis

All reagents unless otherwise stated were obtained from commercial sources and were used without further purification.

### S.2.1. General remarks

For the synthesis of mod%-H/L series a mixture of AcOH and DMF 20:80 v:v% was used to separately dissolve the different synthetic components prior to their mixing into the reaction jars, as further explained during this section. In all syntheses the jars were placed in an oven at room temperature and heated to 120° C using 2° C/min ramp. The temperature was maintained for 48 hours and cooled down to room temperature using 0.4° C/min ramp. The resultant powder was collected by centrifugation (5000 rpm, 5 min) and washed with DMF (x2) and MeOH (x3) through dispersion-centrifugation cycles. The samples were dried under vacuum overnight and further activated by Soxhlet extraction with MeOH during approximately 24 hours. The samples were further dried under vacuum for 24 hours prior to characterization.

<sup>1</sup>HNMR characterization: approximately 5 mg of the MOF were digested in 0.6 mL of DMSO-d<sub>6</sub> and 5 drops of D<sub>2</sub>SO<sub>4</sub> by heating at 75°C and stirring until complete dissolution.

Dynamic Light Scattering (DLS) Measurements: The particle size, aggregation and colloidal dispersion were measured by dynamic light scattering (DLS) in water and dichloromethane. In a scintillation vial, dispersions of the samples with a concentration of 0.25 mgmL<sup>-1</sup> were prepared by sonication over 10 minutes prior to measurement.

### S.2.2. High Throughput Synthetic protocols

The synthetic conditions (**Tables S1** and **S2**) were modified from previous publications from the group:<sup>9,10</sup>

**Procedure for the exploration of MUV-10 coordination modulation variables:** CaCl<sub>2</sub> (66 mg, 1 equivalent) was dissolved in a 25 mL pyrex jar using 2 mL of the solvent mixture. In a separate vial, btc (1.5 equivalents), was dissolved in 9.8 mL of the solvent mixture. The btc solution was added to the CaCl<sub>2</sub> containing jar and the mixture was gently stirred, followed by slow Ti(IV) isopropoxide addition (1 equivalent) and gentle stirring. In the unmodulated syntheses where no AcOH is used, the same amount of final volume is reached with DMF as the only solvent. If the synthetic conditions involve the use of HCl instead of AcOH (the same volume of HCl, 2.2 mL) is added to the btc/CaCl<sub>2</sub> mixture prior to Ti(IV) isopropoxide addition. AcOH sample (solvent mixture 11.8 mL), HCl sample (9.6 mL of DMF + 2.2 mL of HCl) and unmodulated sample (11.8 mL of DMF).

**Procedure for MUV-10 mod%-H series:** CaCl<sub>2</sub> (66 mg, 1 equivalent) was dissolved in a 25 mL pyrex jar using 2 mL of the solvent mixture. In a separate vial, 1.5 equivalents of btc and the desired number of equivalents of modulator were dissolved in 9.8 mL of the solvent mixture. Both solutions were mixed in the pyrex jar followed by slow Ti(IV) isopropoxide addition (1 equivalent) and gentle stirring. See **Tables S1** and **S2** for tabulated values.

**Procedure for MUV-10 mod%-L series:** CaCl<sub>2</sub> (266 mg, 1 equivalent) was dissolved in an 80 mL pyrex jar using 10 mL of the solvent mixture. In a separate vial, 1 equivalent of

btc+mod was dissolved in 37.2 mL of the solvent mixture. The btc/mod solution was added to the CaCl<sub>2</sub> containing jar and the mixture was gently stirred, followed by slow Ti(IV) isopropoxide addition (1 equivalent) and gentle stirring. See **Tables S1** and **S2** for tabulated values.

**Table S1:** Tabulated synthetic conditions of iso%-H and -L.

| Sample's labelling | CaCl <sub>2</sub>  | Ti(O <sup>i</sup> Pr) <sub>4</sub> | btc                   | Modulator             | Mod Vs btc  | Mod Vs ligands |
|--------------------|--------------------|------------------------------------|-----------------------|-----------------------|-------------|----------------|
|                    | Mass/ mmol         | μL/ mmol                           | Mass/ mmol            | Mass/ mmol            | Equivalents | Mod%           |
| <b>MUV-10-H</b>    | 66 mg<br>0.6 mmol  | 177.6 μL<br>0.6 mmol               | 189 mg<br>0.9 mmol    | 0                     | 0           | 0              |
| <b>iso20%-H</b>    | 66 mg<br>0.6 mmol  | 177.6 μL<br>0.6 mmol               | 189 mg<br>0.9 mmol    | 37.4 mg<br>0.225 mmol | 0.25        | 20             |
| <b>iso33%-H</b>    | 66 mg<br>0.6 mmol  | 177.6 μL<br>0.6 mmol               | 189 mg<br>0.9 mmol    | 74.8 mg<br>0.45 mmol  | 0.5         | 33             |
| <b>iso43%-H</b>    | 66 mg<br>0.6 mmol  | 177.6 μL<br>0.6 mmol               | 189 mg<br>0.9 mmol    | 112.1 mg<br>0.675mmol | 0.75        | 43             |
| <b>iso83%-H</b>    | 66 mg<br>0.6 mmol  | 177.6 μL<br>0.6 mmol               | 189 mg<br>0.9 mmol    | 747.6 mg<br>4.5 mmol  | 5           | 83             |
| <b>iso91%-H</b>    | 66 mg<br>0.6 mmol  | 177.6 μL<br>0.6 mmol               | 189 mg<br>0.9 mmol    | 1.495 g<br>9 mmol     | 10          | 91             |
| <b>iso98%-H</b>    | 66 mg<br>0.6 mmol  | 177.6 μL<br>0.6 mmol               | 189 mg<br>0.9 mmol    | 7.476 g<br>45 mmol    | 50          | 98             |
| <b>iso25%-L</b>    | 266 mg<br>2.4 mmol | 710 μL<br>2.4 mmol                 | 307 mg<br>1.8 mmol    | 100 mg<br>0.60 mmol   | 0.33        | 25             |
| <b>iso50%-L</b>    | 266 mg<br>2.4 mmol | 710 μL<br>2.4 mmol                 | 295 mg<br>1.2 mmol    | 199 mg<br>1.20 mmol   | 1           | 50             |
| <b>iso60%-L</b>    | 266 mg<br>2.4 mmol | 710 μL<br>2.4 mmol                 | 240 mg<br>0.96mmol    | 239 mg<br>1.44 mmol   | 1.5         | 60             |
| <b>iso70%-L</b>    | 266 mg<br>2.4 mmol | 710 μL<br>2.4 mmol                 | 122 mg<br>0.72 mmol   | 279 mg<br>1.68 mmol   | 2.33        | 70             |
| <b>iso80%-L</b>    | 266 mg<br>2.4 mmol | 710 μL<br>2.4 mmol                 | 319 mg<br>0.48mmol    | 318 mg<br>1.92 mmol   | 4           | 80             |
| <b>iso90%-L</b>    | 266 mg<br>2.4 mmol | 710 μL<br>2.4 mmol                 | 40.96 mg<br>0.24 mmol | 358 mg<br>2.16 mmol   | 9           | 90             |

\*Note that MUV-10-H refers to MUV-10 AcOH-H.

**Table S2:** Tabulated synthetic conditions of benzo%- H and L.

| Sample's labelling | CaCl <sub>2</sub>  | Ti(OiPr) <sub>4</sub> | btc                   | Modulator           | Mod Vs btc  | Mod Vs ligands |
|--------------------|--------------------|-----------------------|-----------------------|---------------------|-------------|----------------|
|                    | Mass/ mmol         | μL/ mmol              | Mass/ mmol            | Mass/ mmol          | Equivalents | Mod%           |
| <b>MUV-10-H</b>    | 66 mg<br>0.6 mmol  | 177.6 μL<br>0.6 mmol  | 189 mg<br>0.9 mmol    | 0                   | 0           | 0              |
| <b>benzo33%-H</b>  | 66 mg<br>0.6 mmol  | 177.6 μL<br>0.6 mmol  | 189 mg<br>0.9 mmol    | 55mg<br>0.45 mmol   | 0.5         | 33             |
| <b>benzo50%-H</b>  | 66 mg<br>0.6 mmol  | 177.6 μL<br>0.6 mmol  | 189 mg<br>0.9 mmol    | 110 mg<br>0.9 mmol  | 1           | 50             |
| <b>benzo67%-H</b>  | 66 mg<br>0.6 mmol  | 177.6 μL<br>0.6 mmol  | 189 mg<br>0.9 mmol    | 220 mg<br>1.8 mmol  | 2           | 67             |
| <b>benzo83%-H</b>  | 66 mg<br>0.6 mmol  | 177.6 μL<br>0.6 mmol  | 189 mg<br>0.9 mmol    | 550 mg<br>4.5 mmol  | 5           | 83             |
| <b>benzo91%-H</b>  | 66 mg<br>0.6 mmol  | 177.6 μL<br>0.6 mmol  | 189 mg<br>0.9 mmol    | 1.099 g<br>9 mmol   | 10          | 91             |
| <b>benzo98%-H</b>  | 66 mg<br>0.6 mmol  | 177.6 μL<br>0.6 mmol  | 189 mg<br>0.9 mmol    | 5.595 g<br>45 mmol  | 50          | 98             |
| <b>benzo50%-L</b>  | 266 mg<br>2.4 mmol | 710 μL<br>2.4 mmol    | 295 mg<br>1.2 mmol    | 176 mg<br>1.20 mmol | 1           | 50             |
| <b>benzo70%-L</b>  | 266 mg<br>2.4 mmol | 710 μL<br>2.4 mmol    | 122 mg<br>0.72 mmol   | 205 mg<br>1.68 mmol | 2.33        | 70             |
| <b>benzo80%-L</b>  | 266 mg<br>2.4 mmol | 710 μL<br>2.4 mmol    | 102 mg<br>0.48mmol    | 235 mg<br>1.92 mmol | 4           | 80             |
| <b>benzo90%-L</b>  | 266 mg<br>2.4 mmol | 710 μL<br>2.4 mmol    | 40.96 mg<br>0.24 mmol | 264 mg<br>2.16 mmol | 9           | 90             |

\*Note that MUV-10-H refers to MUV-10 AcOH-H.

### S.3. Optimization of the synthesis of defect-free MUV-10 phases

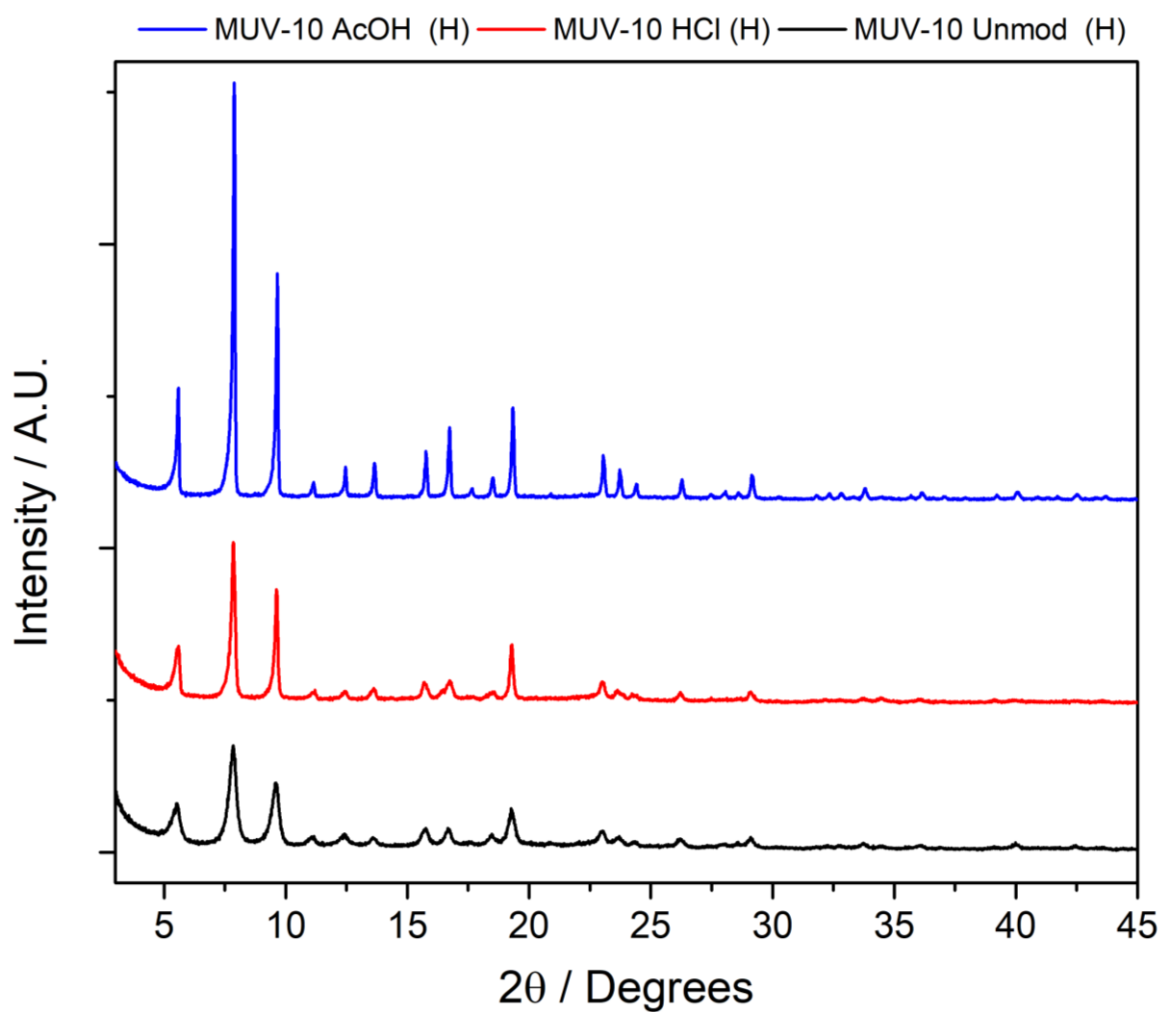

**Figure S1:** PXRD patterns of MUV-10 synthesized in the presence of AcOH, HCl or unmodulated conditions.

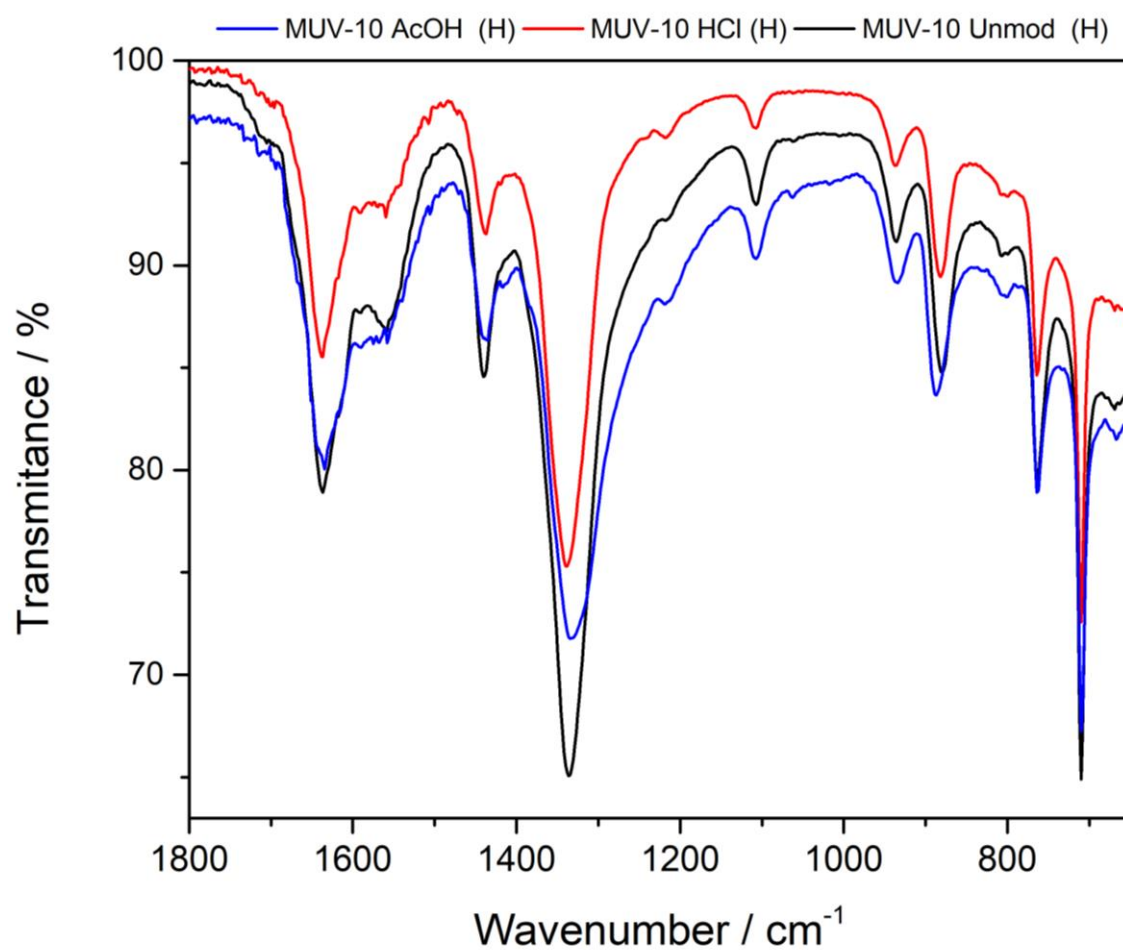

**Figure S2:** FT-IR of MUV-10 synthesized in the presence of AcOH, HCl or unmodulated conditions, showing negligible changes in the vibration bands.



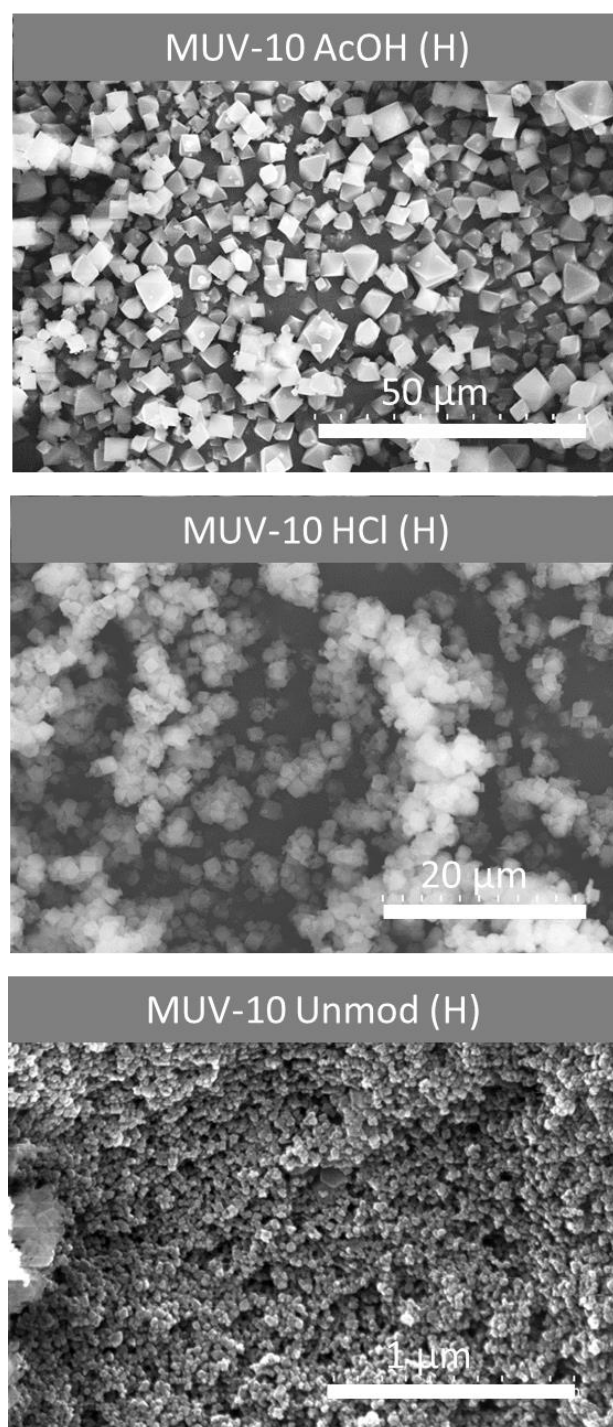

**Figure S3:** SEM images of MUV-10 synthesized in the presence of AcOH, HCl or unmodulated conditions.

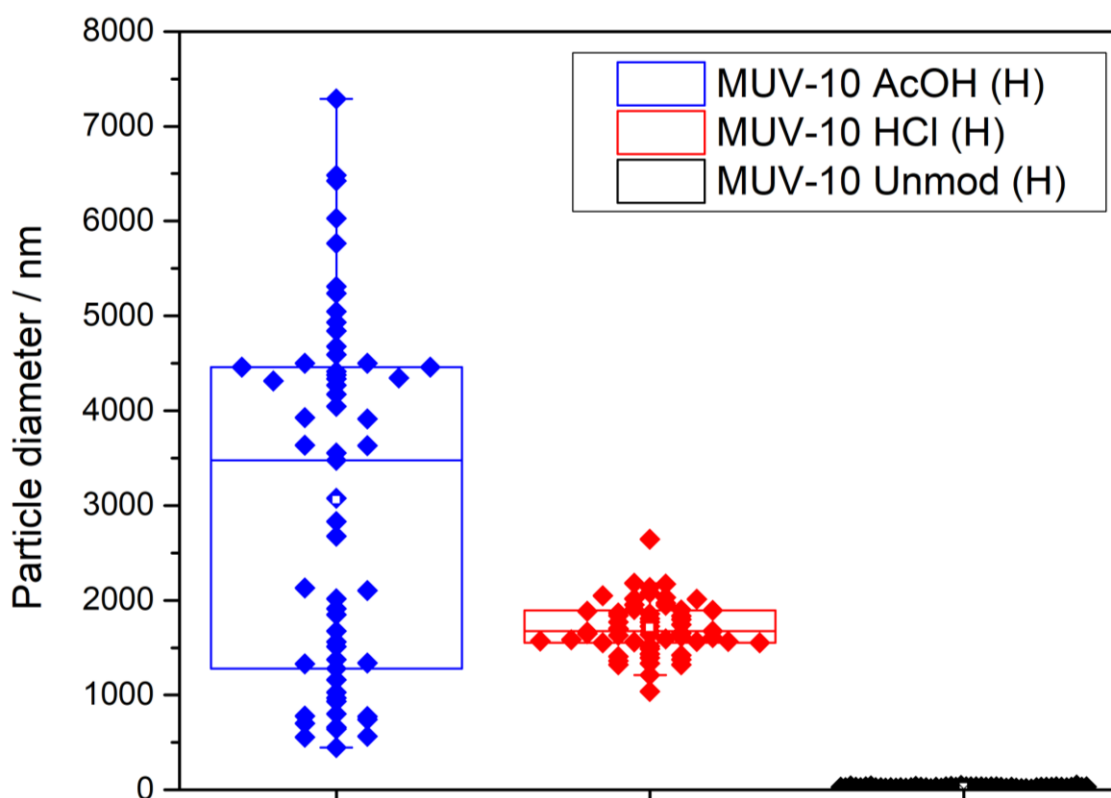

**Figure S4:** Statistic box charts displaying particle size of MUV-10 synthesized under different conditions. The box chart represents the average  $\pm$  standard deviation particle size, alongside with the 25% and 75% percentiles for a bin size of 50 nm and particle size count higher than 50. Compared to AcOH, HCl addition results in a more homogeneous distribution of particle sizes with no statistical difference in size. The particle size of the unmodulated MOF drastically decreases, suggesting faster nucleation. These results suggest that AcOH acts as a pH regulator and a crystal growth promoter modulator.

**Table S3:** Tabulated particle sizes, standard deviations, and metal content in mole per cent versus the total metal content (determined by EDX) of MUV-10 in presence of AcOH, HCl or unmodulated conditions. For a pristine structure, the theoretical Ca:Ti ratio is 1:1.

| Sample              | Particle size (SD) (nm) | % Ca  | % Ti  |
|---------------------|-------------------------|-------|-------|
| <b>MUV-10 AcOH</b>  | 3064 (1933)             | 46.7  | 53.3  |
| <b>MUV-10 HCl</b>   | 1710 (280)              | 48.18 | 51.82 |
| <b>MUV-10 unmod</b> | 28.1 (7.7)              | 46.73 | 53.27 |

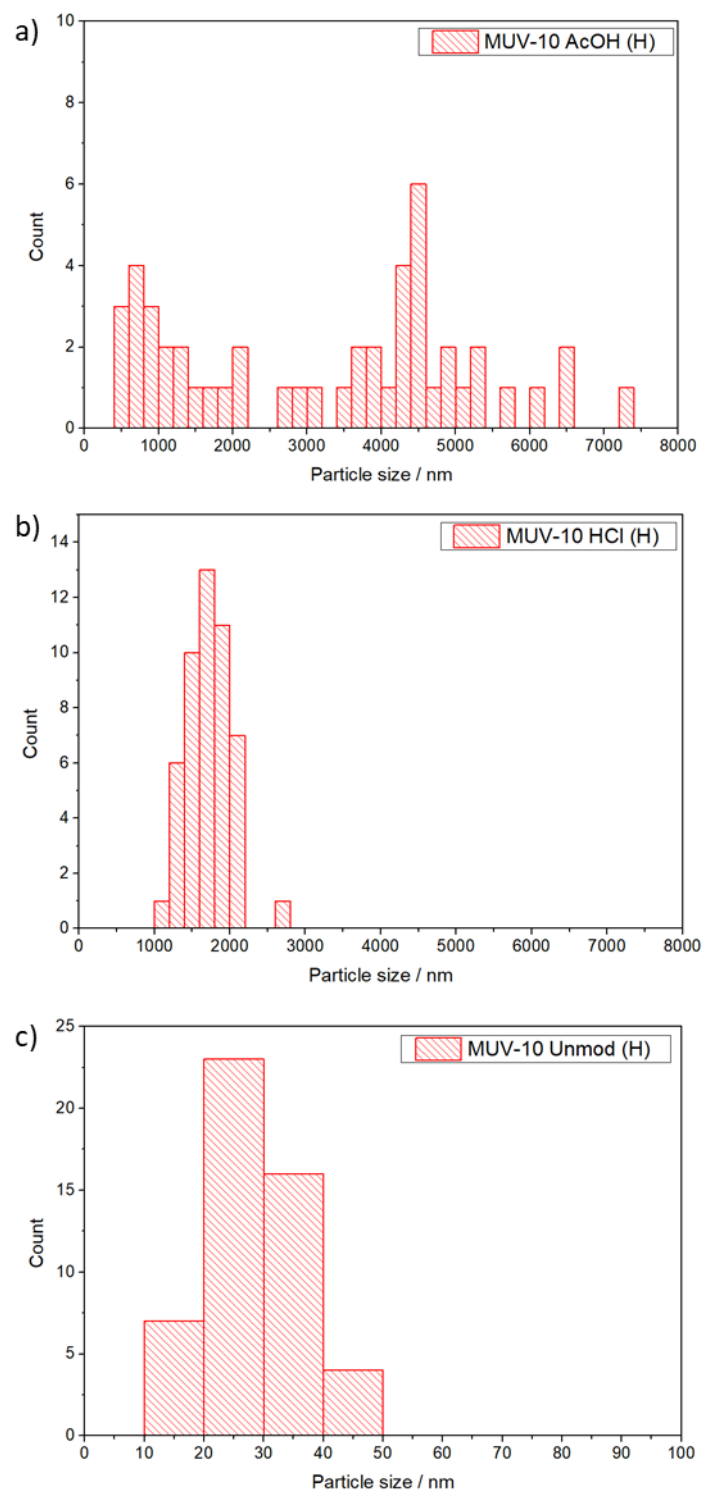

**Figure S5:** Histograms of the particle size distribution of MUV-10 synthesised under different conditions for a particle count of 50. Bin size of 200 nm for upon AcOH and HCl modulation and 10 nm for the unmodulated synthesis.

**Table S4:** Tabulated data extracted from  $^1\text{H}$ NMR of acid digested MUV-10 samples synthesized in the presence of AcOH, HCl or unmodulated conditions. formic acid (fa) in the structure is expressed as **mole ratio** (i.e.  $\text{fa ratio} = \frac{\text{fa}}{\text{btc}}$ ) and **mole per cent** (i.e.  $\text{fa mol\%} = \frac{\text{fa}}{\text{fa} + \text{btc}} * 100$ ).

| Sample       | fa mol% | fa ratio |
|--------------|---------|----------|
| MUV-10 AcOH  | 1       | 0.010    |
| MUV-10 HCl   | 1.5     | 0.015    |
| MUV-10 Unmod | 3.7     | 0.038    |

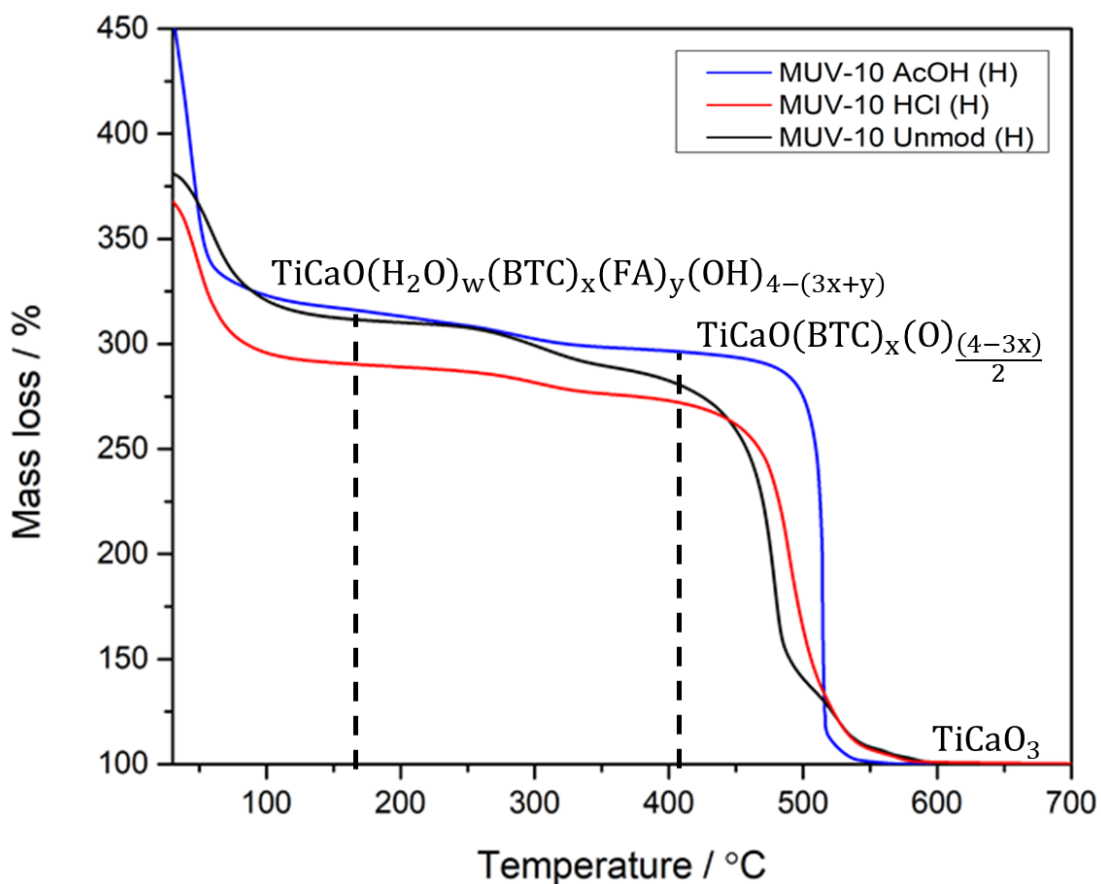

**Figure S6:** TGA profiles of MUV-10 samples synthesised under different conditions. The proposed formulas after the desorption of pore solvent/water ( $T=160^\circ\text{C}$ ) and dehydration and decomposition modulator molecules ( $T=410^\circ\text{C}$ ) have been added for clarity. Data has been normalized to the mass of the  $\text{TiCaO}_3$  residue.

Inspired by Lilleroud *et. al.*,<sup>11,12</sup> to provide a direct comparison of the mass loss of different materials we have normalized the residues to 100% (**Figure S6**). We have performed our calculations based on the experimental mass ratio between the structure and its residue using methodology recently reported by one of us.<sup>13</sup>

For MUV-10 DH the molecular formula should be  $\text{TiCaO}(\text{btc})_x(\text{O})_{(4-3x)/2}$ , where oxygens coming from defect compensating species previously decomposed compensate for the missing linker's charge,<sup>12,13</sup> and the metal residue should be  $\text{TiCaO}_3$ . Then, the ratio between the MOF and the residue should be as follows:

$$\text{Experimental } \frac{\text{DH MOF}}{\text{Residue}} \text{ Ratio } (R_{\text{expDH}}) = \frac{M_w [\text{T410 } ^\circ\text{C}]}{M_w [\text{Residue}]} = \frac{M_w [\text{TiCaO}(\text{btc})_x(\text{O})_{(4-3x)/2}]}{M_w [\text{TiCaO}_3]}$$

Hence,

$$x \text{ btc} = \frac{(R_{\text{expDH}} * M_w [\text{TiCaO}_3]) - \text{Mass TiCaO} - 2 * M_w [\text{O}]}{M_w [\text{btc}] - \left(\frac{3}{2}\right) * M_w [\text{O}]}$$

$$\text{Number of Formate} = \text{number of btc} * \left(\frac{\text{fa}}{\text{btc}}\right) \text{NMR ratio}$$

Since  $\text{Cl}^-$  species were not observed by EDX, we have assumed that  $\text{OH}^-$  ligands are compensating for the overall charge balance. Hence, the number of  $\text{OH}^-$  needed to compensate the charge can be calculated using the charge balance equation:

$$4\text{Ti} + 2\text{Ca} = 2 + 3x\text{btc} + x\text{NMRfa} + z\text{OH}$$

$$\text{Then } z\text{OH} = 4 - 3x\text{btc} - x\text{NMRfa}$$

Once the number of linkers, modulators and defect-compensating species has been determined, number of water molecules is calculated as:

$$\text{Experimental } \frac{\text{MOF}}{\text{Residue}} \text{ Ratio } (R_{\text{exp}}) = \frac{M_w [\text{T 160 } ^\circ\text{C}]}{M_w [\text{Residue}]} = \frac{M_w [\text{TiCaO}(\text{btc})_x(\text{H}_2\text{O})_w(\text{Mod})_y(\text{OH})_z]}{M_w [\text{TiCaO}_2]}$$

$$\text{Experimental } \frac{\text{MOF}}{\text{Residue}} \text{ Ratio } (R_{\text{exp}}) = \frac{M_w [\text{Calculated MOF}] + w * M_w [\text{H}_2\text{O}]}{M_w [\text{TiCaO}_3]}$$

$$w (\text{H}_2\text{O}) = \frac{(R_{\text{exp}} * M_w [\text{TiCaO}_3]) - M_w [\text{Calculated MOF}]}{M_w [\text{H}_2\text{O}]}$$

The calculated structure (**Table S5**) is then used to calculate its mass per cent before decomposition and these values are compared with the experimental values to validate the method (**Table S6**), alongside with the calculated coordination positions, which for a pristine  $\text{TiCaO}(\text{H}_2\text{O})_2(\text{btc})_{1.33}$  should be 13 (7-coordinated Calcium and 6-coordinated Titanium).<sup>9</sup>

**Table S5:** Molecular formula of MUV-10 samples synthesised in the presence of AcOH, HCl or unmodulated conditions as extracted from TGA.

| Sample              | $R_{\text{expDH}}$ | NMR<br>fa/btc | Calculated structure                                                                            | ML%   |
|---------------------|--------------------|---------------|-------------------------------------------------------------------------------------------------|-------|
| <b>MUV-10</b>       | 289                | 0.010         | $\text{TiCaO}(\text{H}_2\text{O})_2(\text{btc})_{1.40}(\text{fa})_{0.01}$                       | -0.7% |
| <b>MUV-10 HCl</b>   | 271                | 0.015         | $\text{TiCaO}(\text{H}_2\text{O})_{1.1}(\text{btc})_{1.27}(\text{fa})_{0.02}(\text{OH})_{0.17}$ | 6.4%  |
| <b>MUV-10 unmod</b> | 266                | 0.038         | $\text{TiCaO}(\text{H}_2\text{O})_{2.8}(\text{btc})_{1.23}(\text{fa})_{0.04}(\text{OH})_{0.26}$ | 10.1% |

**Table S6:** Experimental mass per cent at  $t$  160°C in comparison with the calculated mass % based on the calculated structures (**Table S5**) both with and without axial water molecules, alongside with coordinating positions.

| Sample              | $R_{\text{exp}}$ | $R_{\text{theo}}$ | $R_{\text{expDH}}$ | $R_{\text{theoDH}}$ | Coordination<br>positions (CP) |
|---------------------|------------------|-------------------|--------------------|---------------------|--------------------------------|
| <b>MUV-10</b>       | 312              | 312               | 289                | 289                 | 13.26                          |
| <b>MUV-10 HCl</b>   | 290              | 290               | 271                | 271                 | 11.96                          |
| <b>MUV-10 unmod</b> | 309              | 309               | 266                | 266                 | 13.51                          |

**Table S7:** Tabulated porosimetry extracted from  $\text{N}_2$  adsorption and desorption measurements of MUV-10 samples synthesized under different conditions, showing that microporosity is higher upon AcOH addition.

| Sample              | $S_{\text{BET}} / S_{\text{MICRO}}$<br><sup>2</sup><br>(m <sup>2</sup> /g) | Micro / Meso pores volume<br><sup>3</sup><br>(cm <sup>3</sup> /g) |       | Total Pore<br>volume (cm <sup>3</sup> /g) |
|---------------------|----------------------------------------------------------------------------|-------------------------------------------------------------------|-------|-------------------------------------------|
| <b>MUV-10 AcOH</b>  | 1041 / 975                                                                 | 0.365                                                             | 0.008 | 0.373                                     |
| <b>MUV-10 HCl</b>   | 935 / 853                                                                  | 0.326                                                             | 0.071 | 0.397                                     |
| <b>MUV-10 unmod</b> | 745 / 552                                                                  | 0.221                                                             | 0.489 | 0.710                                     |

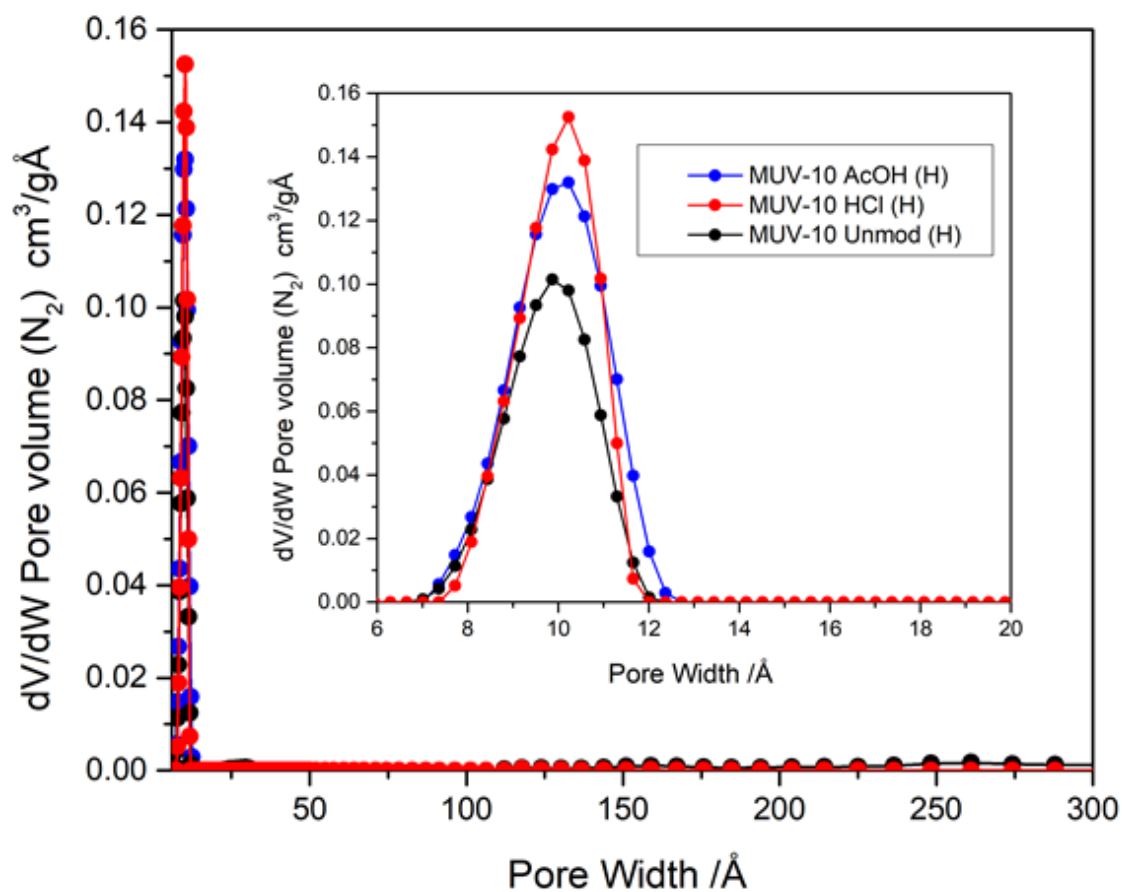

**Figure S7:** Pore size distributions of MUV-10 samples synthesized under different experimental conditions. Data was obtained from  $\text{N}_2$  adsorption/desorption isotherms using a Cylindrical pore oxide surface model (QSDT).

#### S.4. Scope of synthetic conditions used to explore defect engineering of MUV-10.

**Table S8:** Table enclosing btc/metal ratio (equivalents), percentage of btc present in the synthesis in comparison to the pristine unit formula (1.33 eq.), the number of equivalents of modulator compared to metal and to linker, and the percentage of modulator versus the total amount of ligands (linker + modulator).

| Sample's labelling<br>mod= iso or benzo | btc vs metal | btc vs pristine | mod vs metal | mod vs btc | mod vs total ligands |
|-----------------------------------------|--------------|-----------------|--------------|------------|----------------------|
|                                         | Eqs          | %               | Eqs          | Eqs        | %                    |
| MUV-10-H                                | 1.5          | 112.78          | 0            | 0          | 0                    |
| mod20%-H                                | 1.5          | 112.78          | 0.375        | 0.25       | 20.00                |
| mod33%-H                                | 1.5          | 112.78          | 0.75         | 0.50       | 33.33                |
| mod43%-H                                | 1.5          | 112.78          | 1.11         | 0.75       | 42.58                |
| mod50%-H                                | 1.5          | 112.78          | 1.5          | 1.00       | 50.00                |
| mod67%-H                                | 1.5          | 112.78          | 3            | 2.00       | 66.67                |
| mod83%-H                                | 1.5          | 112.78          | 7.5          | 5.00       | 83.33                |
| mod91%-H                                | 1.5          | 112.78          | 15           | 10.00      | 90.91                |
| mod98%-H                                | 1.5          | 112.78          | 75           | 50.00      | 98.04                |
| MUV-10-L                                | 1            | 75.19           | 0            | 0          | 0.00                 |
| mod25%-L                                | 0.75         | 56.39           | 0.25         | 0.33       | 25.00                |
| mod50%-L                                | 0.5          | 37.59           | 0.5          | 1.00       | 50.00                |
| mod60%-L                                | 0.4          | 30.08           | 0.6          | 1.50       | 60.00                |
| mod70%-L                                | 0.3          | 22.56           | 0.7          | 2.33       | 70.00                |
| mod80%-L                                | 0.2          | 15.04           | 0.8          | 4.00       | 80.00                |
| mod90%-L                                | 0.1          | 7.52            | 0.9          | 9.00       | 90.00                |

\*Note that MUV-10-H refers to MUV-10 AcOH-H.



## S.5. Defect incorporation in conditions adequate for MUV-10 formation: characterization of MUV-10 mod%-H.

### S.5.1 Incorporation of modulators in MUV-10 iso%-H and benzo%-H as estimated with <sup>1</sup>H-NMR.

Both isophthalic acid and benzoic acid modulator were present in the <sup>1</sup>H-NMR profiles alongside with formic acid coming from the decomposition of DMF during the synthesis. Incorporation of modulator and formic acid is expressed as the **molar ratio** (ratio) between modulator and btc,  $\text{Ratio} = \frac{\text{Mod}}{\text{btc}}$  and as the **mole per cent** of modulator (mol%) compared to btc,  $\text{mol\%} = \frac{\text{Mod}}{\text{Mod} + \text{btc}} * 100$ .

**Table S9:** Tabulated <sup>1</sup>H-NMR data from acid digested iso%-H samples. Data shows iso and formic acid content increasing with the addition of modulator up to iso98%-H that does not have formic acid incorporated into the structure.

| Sample   | iso mol % | fa mol % | iso ratio | fa ratio |
|----------|-----------|----------|-----------|----------|
| iso20%-H | 1.31      | 1.09     | 0.013     | 0.011    |
| iso33%-H | 2.34      | 1.91     | 0.024     | 0.019    |
| iso43%-H | 3.49      | 0.93     | 0.036     | 0.009    |
| iso83%-H | 18.88     | 5.08     | 0.233     | 0.054    |
| iso91%-H | 28.93     | 9.24     | 0.407     | 0.102    |
| iso98%-H | 45.32     | 0        | 0.829     | 0.000    |

**Table S10:** Tabulated <sup>1</sup>H-NMR data from acid digested benzo%-H. Data shows benzo and formic acid content increasing with the addition of modulator, although to a lesser extent than upon the addition of isophthalic acid.

| Sample     | benzo mol % | fa mol % | benzo ratio | fa ratio |
|------------|-------------|----------|-------------|----------|
| benzo33%-H | 0.151       | 2.113    | 0.002       | 0.022    |
| benzo50%-H | 0.327       | 0.984    | 0.003       | 0.010    |
| benzo67%-H | 0.862       | 6.757    | 0.009       | 0.072    |
| benzo83%-H | 2.530       | 2.555    | 0.026       | 0.026    |
| benzo91%-H | 4.365       | 2.536    | 0.046       | 0.026    |
| benzo98%-H | 5.079       | 4.679    | 0.054       | 0.049    |

### S.5.2 FT-IR of MUV-10 mod%-H.

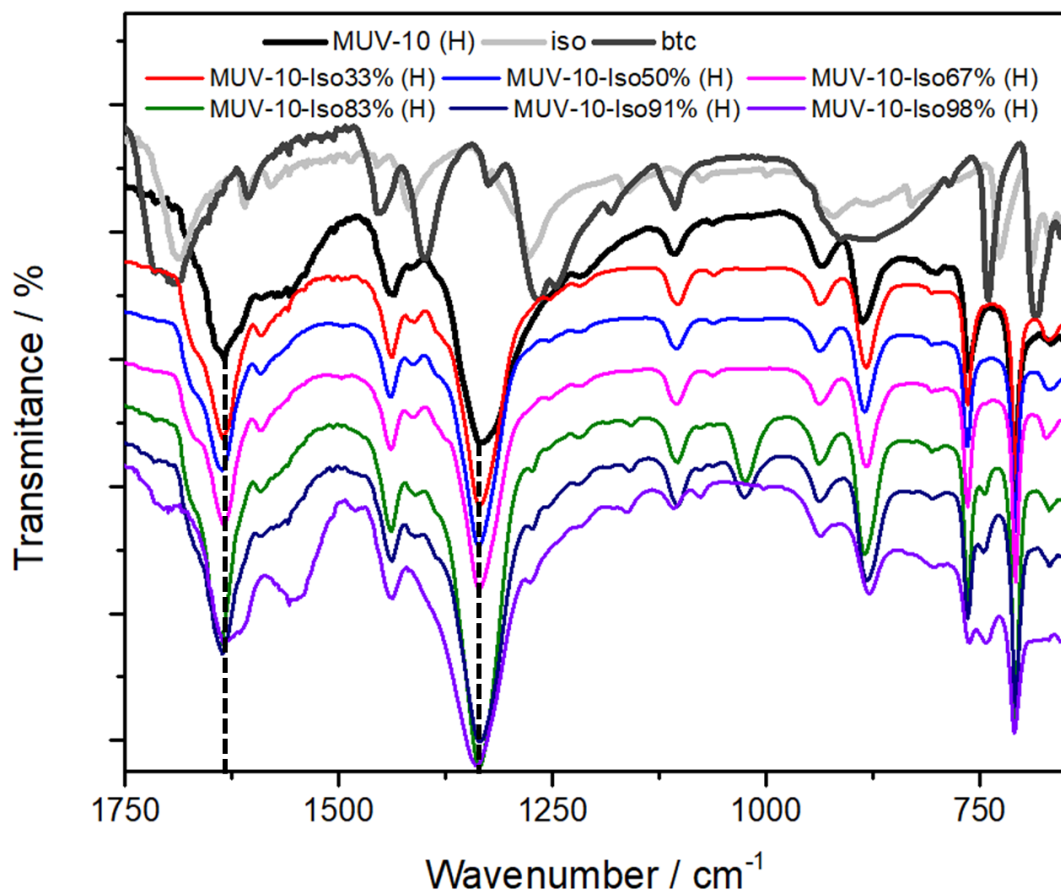

**Figure S8:** Comparison of FT-IR profiles of MUV-10 H, iso, btc, iso 100% and iso%-H. iso%-H series show characteristic vibration bands (ca. 1700 cm<sup>-1</sup>) from the modulator but no free carboxylate vibrations apart from iso98% confirming modulator's attachment to the metal clusters. No shifting in the two major MUV-10 vibration bands (dashed) are observed in any case.

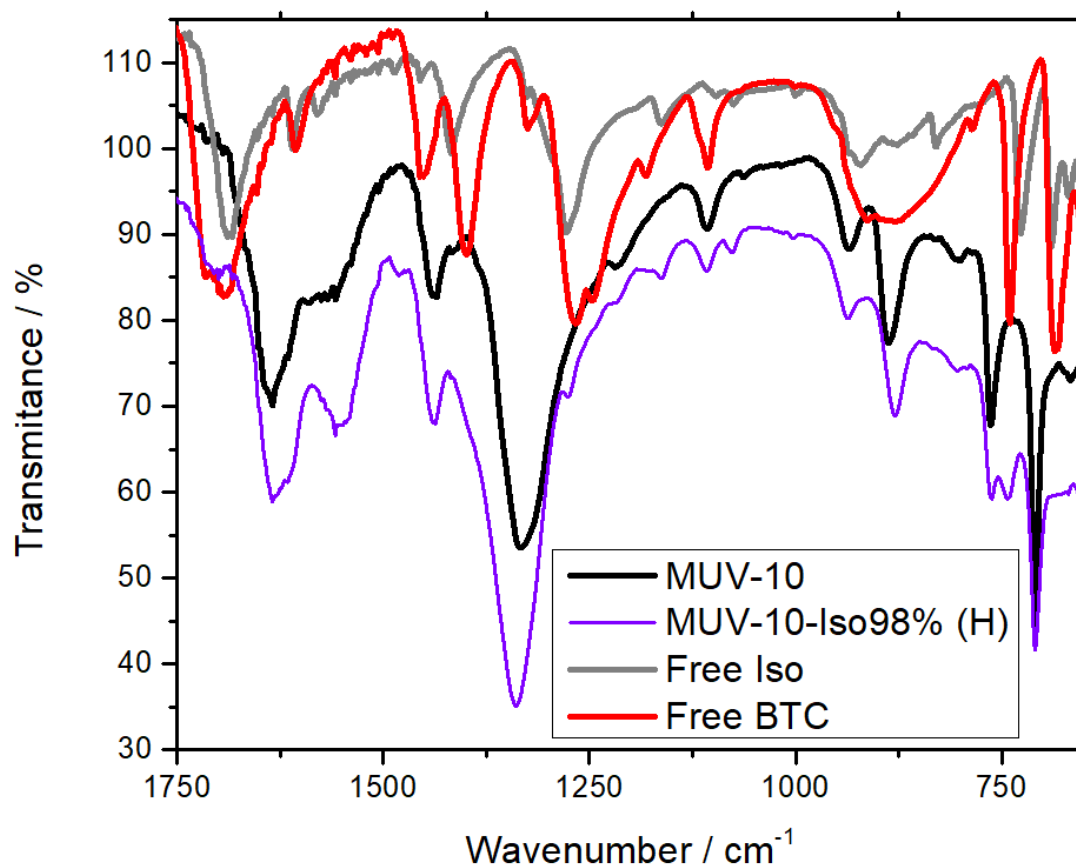

**Figure S9:** Comparison of the FT-IR profile of iso98%-H with MUV-10-H, free isophthalic acid and free btc, suggesting that the new vibration band at ca. 1700 cm<sup>-1</sup> for iso98%-H corresponds to free carboxylate groups from btc. The lack of other signals characteristic of free btc suggests that this vibration band is likely due to tangling linkers or to linkers terminating the surface of the MOF.

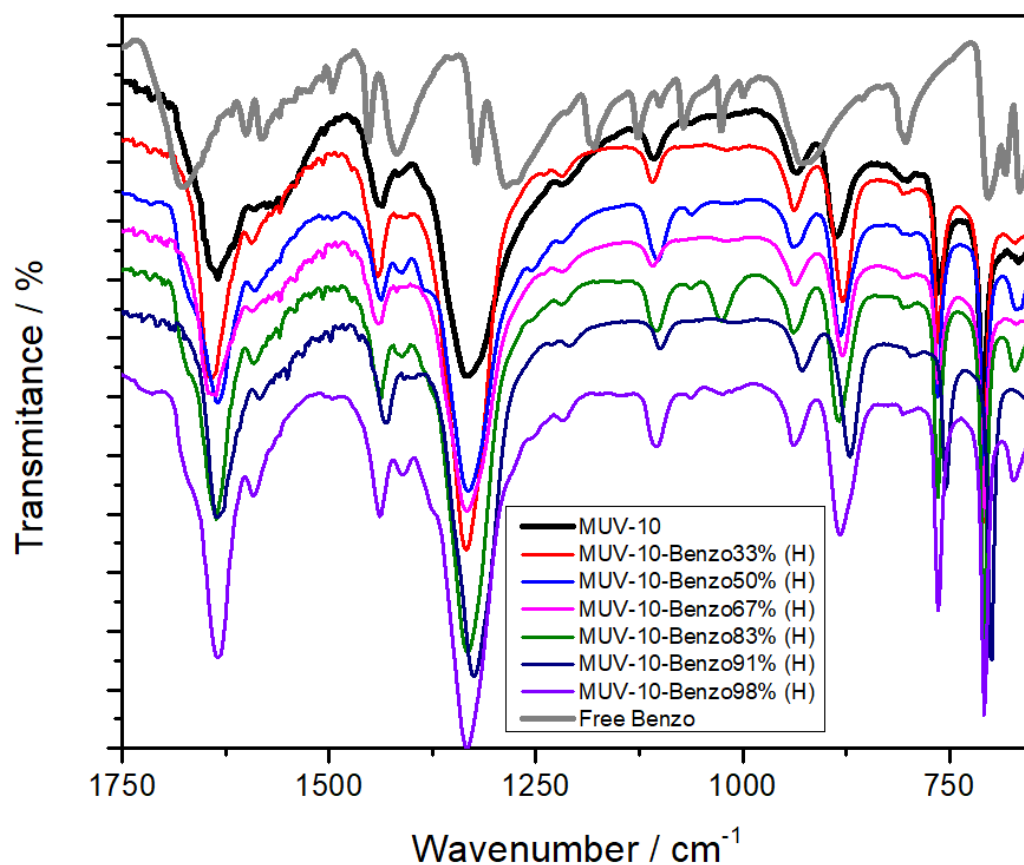

**Figure S10:** FT-IR of the benzo%-H series compared with MUV-10-H and free modulator, showing characteristic vibration bands from the modulator (ca. 1250 $\text{cm}^{-1}$ ) but no free carboxylate vibration band (ca. 1700 $\text{cm}^{-1}$ ), confirming its attachment to the metal clusters.

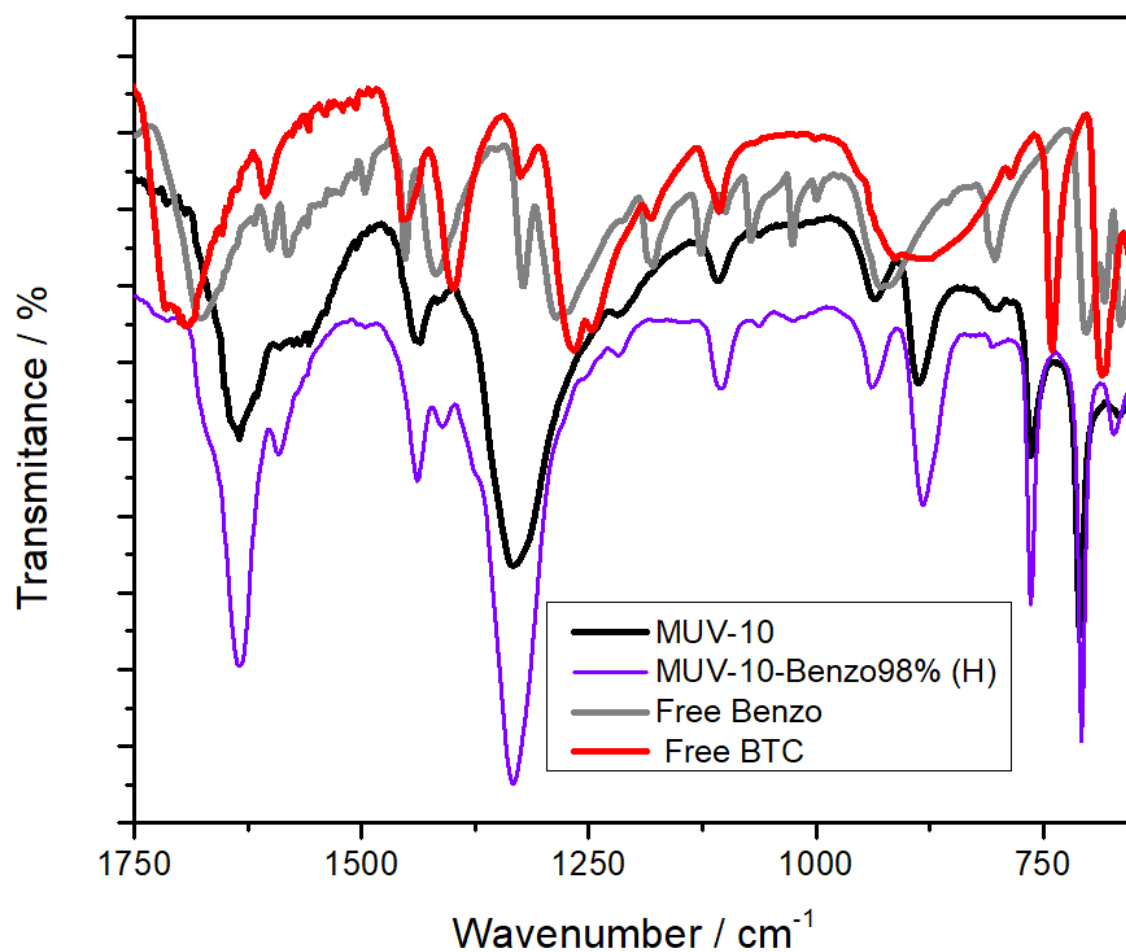

**Figure S11:** Comparison of the FT-IR profile of benzo98%-H with MUV-10, free benzoic acid and free btc, suggesting that the new vibration band at ca. 1700 cm<sup>-1</sup> corresponds to free carboxylate groups from btc, similarly to iso98%-H, suggesting tangling linkers or linkers terminating the surface of the MOF.

### S.5.3. Molar per cent of metals in MUV-10 iso%-H and benzo%-H

**Table S11:** Tabulated metal content of iso%-H.

| Sample          | EDX   |       | ICP   |       |
|-----------------|-------|-------|-------|-------|
|                 | % Ca  | % Ti  | % Ca  | % Ti  |
| <b>MUV-10-H</b> | 46.70 | 53.30 | 46.47 | 53.53 |
| <b>iso20%-H</b> | 45.02 | 54.98 | 50.58 | 49.42 |
| <b>iso33%-H</b> | 45.56 | 54.44 | 49.43 | 50.57 |
| <b>iso43%-H</b> | 43.98 | 56.02 | 43.28 | 56.72 |
| <b>iso83%-H</b> | 43.19 | 56.81 | 47.62 | 52.38 |
| <b>iso91%-H</b> | 41.33 | 58.67 | 43.85 | 56.15 |
| <b>iso98%-H</b> | 36.77 | 63.23 | 46.92 | 53.08 |

**Table S12:** Tabulated metal content of benzo%-H.

| Sample            | EDX   |       | ICP   |       |
|-------------------|-------|-------|-------|-------|
|                   | % Ca  | % Ti  | % Ca  | % Ti  |
| <b>MUV-10 H</b>   | 46.70 | 53.30 | 46.47 | 53.53 |
| <b>benzo33%-H</b> | 42.58 | 57.42 | n/a   | n/a   |
| <b>benzo50%-H</b> | 38.73 | 61.27 | n/a   | n/a   |
| <b>benzo67%-H</b> | 43.60 | 56.40 | n/a   | n/a   |
| <b>benzo83%-H</b> | 42.34 | 57.66 | 50.07 | 49.93 |
| <b>benzo91%-H</b> | 45.56 | 54.44 | n/a   | n/a   |
| <b>benzo98%-H</b> | 55.15 | 44.85 | n/a   | n/a   |

## S.5.4. Thermo Gravimetric Analysis MUV-10 iso%-H and benzo%-H

### S.5.4.1 Thermo Gravimetric Analysis of iso%-H series.

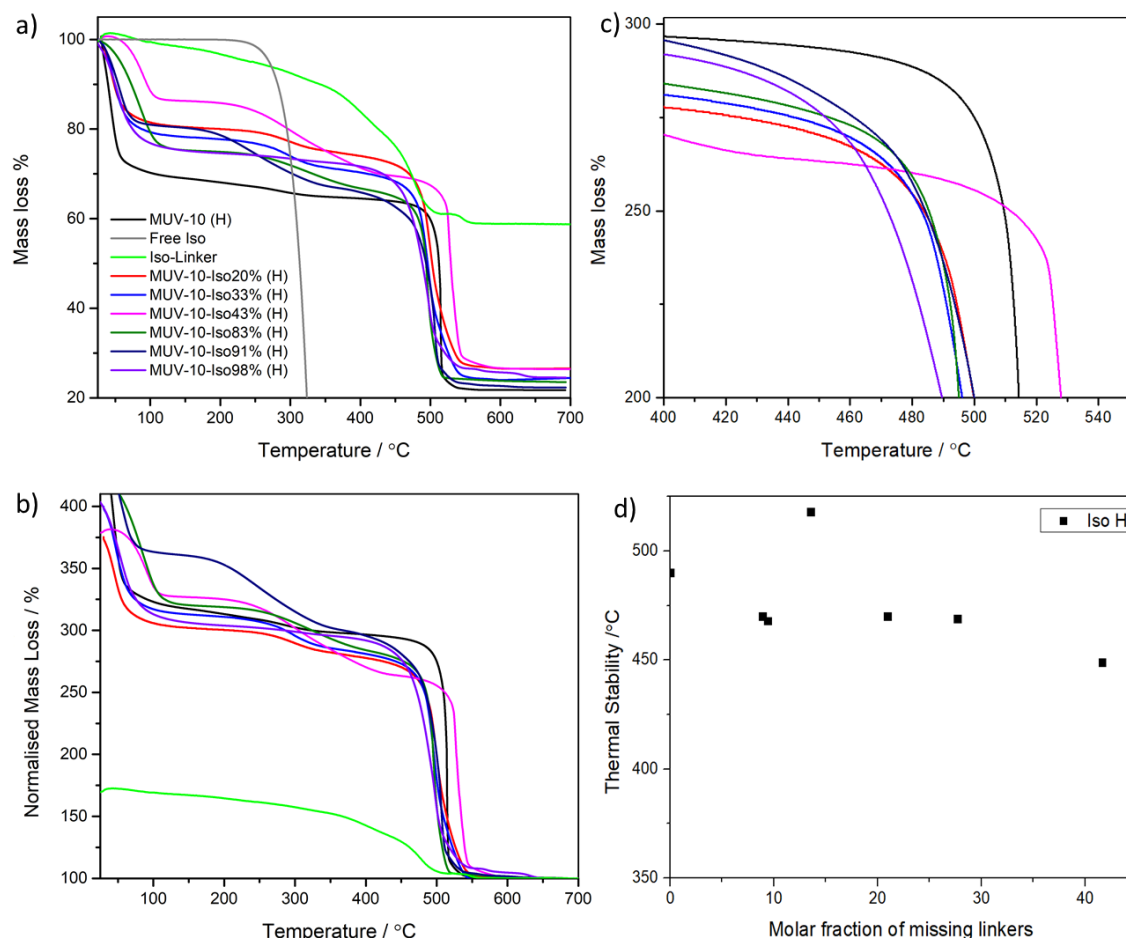

**Figure S12:** TGA profiles of MUV-10, iso 100% and iso%-H samples normalized to a) the start of the decomposition, b) the mass of the residue and c) zoom of the temperature of the last decomposition step. iso%-H samples display a similar decomposition step to pristine MUV-10. The first decomposition step at approx. 200 °C is associated to the decomposition of formic acid and increases with the percentage of modulator added to synthesis. The second decomposition step at 450 °C, is associated to the decomposition of btc and iso ligands in the structure, which is similar to MUV-10-H in magnitude. This –together with the data previously discussed- indicates that iso is partially replacing btc in the structure of MUV-10, with defects compensated by fa and other species such as water/hydroxo pairs. d) Temperature of the last decomposition step as a function of the molar percent of missing linkers, showing a minimum decrease in thermal stability.

From TGA data, and using methodology recently reported by one of us,<sup>13</sup> we have elucidated the composition of the iso%-H series. We have considered three model structures based on previous characterization data: a  $\text{TiCaO}(\text{H}_2\text{O})_w(\text{btc})_x(\text{iso})_y(\text{fa})_z(\text{OH})_d$  MUV-10 defective structure, a mixture of  $\text{TiO}_2$  and a MUV-10 defective structure, and a mixture of the iso 100% phase and MUV-10 defective. We have used the experimental ratio between a structure and its residue at different decomposition steps ( $R_{\text{exp}}$  and  $R_{\text{expDH}}$ ), enclosed in **Table S13**, and the molar ratio between components previously calculated by  $^1\text{H}$ NMR and ICP. The calculated values for each model are given below.

**Table S13:** Experimental values obtained from the thermal decomposition profiles of iso%-H.

| Sample   | $R_{\text{exp}}$ | $R_{\text{expDH}}$ |
|----------|------------------|--------------------|
| MUV-10-H | 3.12             | 2.89               |
| iso20%-H | 3.00             | 2.64               |
| iso33%-H | 3.10             | 2.67               |
| iso43%-H | 3.25             | 2.60               |
| iso83%-H | 3.18             | 2.69               |
| iso91%-H | 3.53             | 2.73               |
| iso98%-H | 3.05             | 2.75               |



**-Model structure:**  $[\text{TiCaO}(\text{H}_2\text{O})_w(\text{btc})_x(\text{iso})_y(\text{fa})_z(\text{OH})_D]^{13}$

A small introduction to the application of TGA methodology to MUV-10 is given in Section S.3. The composition of the MOF at each stage of its decomposition profile is given in Figure S13.

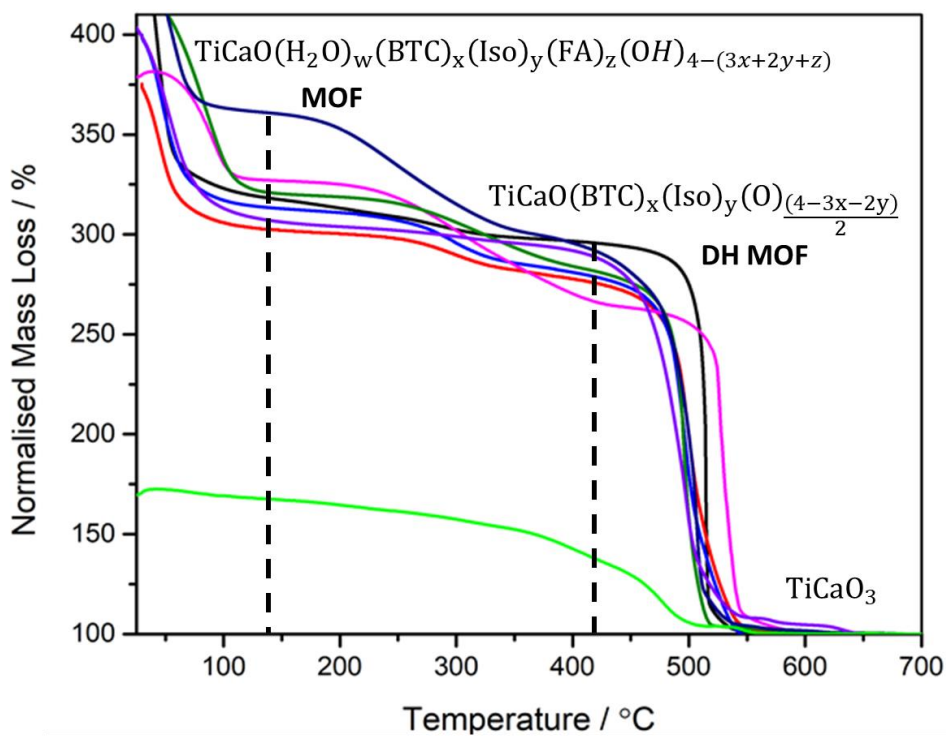

**Figure S13:** TGA profiles of iso%-H where residues are normalized to 100 %, alongside with the proposed structure of the MOF at each decomposition step for a  $\text{TiCaO}(\text{H}_2\text{O})_w(\text{btc})_x(\text{iso})_y(\text{fa})_z(\text{OH})_D$  model. Legend from Figure S12.

**Table S14:** Calculated structures  $[\text{TiCaO}(\text{H}_2\text{O})_w(\text{btc})_x(\text{iso})_y(\text{fa})_z(\text{OH})_D]$  of MUV-10-iso H assuming a 1:1 Ti: Ca ratio, enclosing the number of molecules, number and per cent of missing linkers, validation of the calculations with  $R_{\text{theo}}$  and MUV-10 coordination positions (CP).

| Sample   | btc   | fa    | iso   | OH     | H <sub>2</sub> O | Missing Linker | ML%   | $R_{\text{theo}}$ | CP    |
|----------|-------|-------|-------|--------|------------------|----------------|-------|-------------------|-------|
| MUV-10-H | 1.403 | 0.014 | 0.000 | -0.223 | 2.0              | -0.073         | -5.25 | 3.12              | 13.04 |
| iso20%-H | 1.208 | 0.013 | 0.016 | 0.331  | 2.5              | 0.122          | 9.40  | 3.00              | 13.16 |
| iso33%-H | 1.214 | 0.024 | 0.029 | 0.275  | 3.1              | 0.116          | 8.91  | 3.10              | 13.80 |
| iso43%-H | 1.153 | 0.011 | 0.042 | 0.448  | 4.7              | 0.177          | 13.53 | 3.25              | 15.22 |
| iso83%-H | 1.054 | 0.056 | 0.245 | 0.292  | 3.5              | 0.276          | 20.95 | 3.18              | 14.17 |
| iso91%-H | 0.964 | 0.098 | 0.392 | 0.225  | 5.8              | 0.366          | 27.68 | 3.53              | 16.53 |
| iso98%-H | 0.778 | 0.000 | 0.645 | 0.378  | 2.1              | 0.552          | 41.65 | 3.05              | 12.70 |

**-Model structure:**  $\text{TiO}_2@[\text{TiCaO}(\text{H}_2\text{O})_w(\text{btc})_x(\text{iso})_y(\text{fa})_z(\text{OH})_D]^{13}$

The composition of the MOF at each stage of its decomposition profile is given in Figure S14. Rearranging the  $R_{\text{expDH}}$  equation, the number of linkers is obtained, and a similar approach is used to calculate the rest of the components.

$$X_{\text{btc}} = \frac{\left( \frac{(R_{\text{expDH}} - R\% \text{TiO}_2) * M_w [\text{TiCaO}_3]}{R\% \text{MOF}} - M_w \text{TiCaO} - 2 * M_w [\text{O}] \right)}{M_w [\text{BTC}] + nmr * M_w [\text{Iso}] - \left( \frac{(3 + 2nmr)}{2} \right) * M_w [\text{O}]}$$

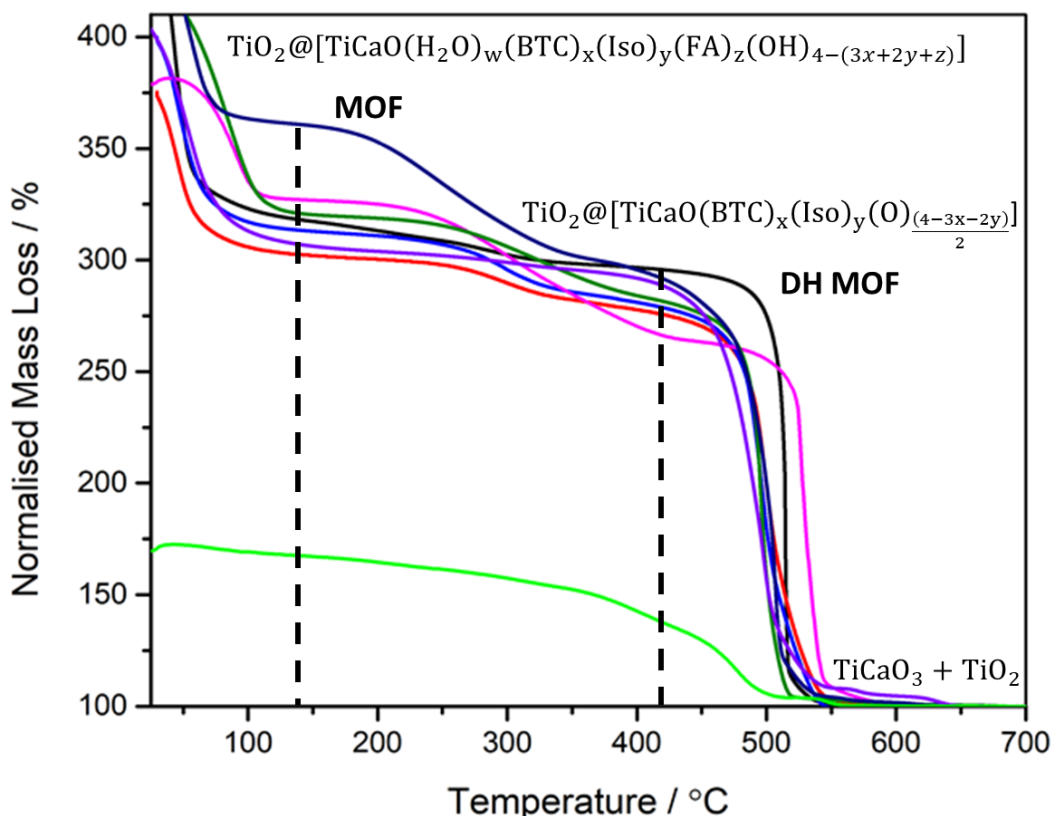

**Figure S14:** TGA profiles of iso%- H where residues are normalized to 100 %, alongside with the proposed structure of the MOF at each decomposition step for a  $\text{TiO}_2@[\text{TiCaO}(\text{H}_2\text{O})_w(\text{btc})_x(\text{iso})_y(\text{fa})_z(\text{OH})_D]$  model. Legend from Figure S12.

**Table S15** shows that if assuming that the extra Titanium comes from  $\text{TiO}_2$ , MUV-10 H has a ca. 13 % more linker than the pristine structure. In consequence, negative values of  $\text{OH}^-$  species compensating the charge in the structure are obtained, meaning that the structures will be positively charged. Furthermore, remarkably high water molecules and overall coordination numbers (reaching 21) are determined. Additionally, the defectivity of the samples does not follow any trend with iso incorporation (**Table S16**). This indicates, that the small extra amount of Titanium might come from the different termination of the crystals, which will also explain why the molar ratio of metals determined by EDX differs from the one determined by ICP.

**Table S15:** Calculated structures  $\text{TiO}_2@[\text{TiCaO}(\text{H}_2\text{O})_w(\text{btc})_x(\text{iso})_y(\text{fa})_z(\text{OH})_D]$  of iso%- H assuming that the titanium in excess in comparison to calcium is in the form of  $\text{TiO}_2$ .

| Sample          | %R $\text{TiO}_2$ | %R MOF | btc   | fa    | iso   | OH     | $\text{H}_2\text{O}$ |
|-----------------|-------------------|--------|-------|-------|-------|--------|----------------------|
| <b>MUV-10 H</b> | 0.072             | 0.928  | 1.511 | 0.015 | 0.000 | -0.548 | 2.1                  |
| <b>iso20%-H</b> | -0.014            | 1.014  | 1.192 | 0.013 | 0.016 | 0.380  | 2.5                  |
| <b>iso33%-H</b> | 0.013             | 0.987  | 1.231 | 0.024 | 0.030 | 0.224  | 3.3                  |
| <b>iso43%-H</b> | 0.154             | 0.846  | 1.363 | 0.013 | 0.049 | -0.201 | 6.2                  |
| <b>iso83%-H</b> | 0.055             | 0.945  | 1.115 | 0.060 | 0.260 | 0.075  | 5.3                  |
| <b>iso91%-H</b> | 0.141             | 0.859  | 1.123 | 0.114 | 0.457 | -0.397 | 9.7                  |
| <b>iso98%-H</b> | 0.072             | 0.928  | 0.838 | 0.000 | 0.694 | 0.099  | 6.5                  |

**Table S16:** Calculated structures  $\text{TiO}_2@[\text{TiCaO}(\text{H}_2\text{O})_w(\text{btc})_x(\text{iso})_y(\text{fa})_z(\text{OH})_D]$  of iso%- H enclosing the number and per cent of missing linkers, validation of the calculations with  $R_{\text{theo}}$  and the calculated mass fraction of MUV-10 and its coordination positions, resulting in very high numbers that confirm that the extra Titanium is not forming  $\text{TiO}_2$ .

| Sample          | Missing Linker | ML%    | $R_{\text{theo}}$ | Mass fraction MUV-10 | Coordination positions |
|-----------------|----------------|--------|-------------------|----------------------|------------------------|
| <b>MUV-10 H</b> | -0.178         | -13.36 | 3.12              | 0.977                | 13.66                  |
| <b>iso20%-H</b> | 0.141          | 10.61  | 3.00              | 1.005                | 13.14                  |
| <b>iso33%-H</b> | 0.102          | 7.66   | 3.10              | 0.996                | 14.10                  |
| <b>iso43%-H</b> | -0.030         | -2.25  | 3.25              | 0.953                | 17.38                  |
| <b>iso83%-H</b> | 0.218          | 16.32  | 3.18              | 0.983                | 16.23                  |
| <b>iso91%-H</b> | 0.210          | 15.76  | 3.53              | 0.960                | 21.12                  |
| <b>iso98%-H</b> | 0.495          | 37.15  | 3.05              | 0.977                | 17.38                  |

**-Model structure accounts for a combination of iso 100% and defective MUV-10 phases: iso-Linker@[TiCaO(H<sub>2</sub>O)<sub>w</sub>(btc)<sub>x</sub>(iso)<sub>y</sub>(fa)<sub>z</sub>(OH)<sub>D</sub>]**

**Table 17:** Data extracted from TGA profiles of the pure iso-Linker phase.

|                                     |                   |
|-------------------------------------|-------------------|
| Rexp iso100 % iso-phase             | 1.51              |
| iso / Ti (n)                        | 0.275             |
| Oxygen /Ti                          | 1.725             |
| M <sub>w</sub> DH isophase exp/calc | 120.598 / 120.598 |
| M <sub>w</sub> isophase exp/calc    | 128.584 / 128.584 |

In order to include the iso-Linker phase as a constant into the TGA analysis of the MOFs composition, the mass fraction of MUV-10 and iso-Linker phase in the residue (denominated R%MOF and R%iso) were calculated as for the previous method, being the residue of MUV-10 TiCaO<sub>3</sub> and of the iso-Linker phase TiO<sub>2</sub>.

Since the pristine sample has a slightly higher amount of Ti than Ca, the normalized extra Ti% of MUV-10 is subtracted to the normalized extra Ti% of MUV-10-iso, and as the iso-linker phase has traces of Ca, the values are further normalized to its Ti%, hence being the unmodulated sample the 0% and the iso-Linker phase the 100%.

The experimental ratio of the overall framework, which includes both iso-linker phase and MUV-10, and the total residue (given by TGA) is denominated as R<sub>exp</sub>:

$$R_{exp} = R_{expMOF} * R\%MOF + R_{expisophase} * R\%iso$$

$$R_{expDH} = R_{expDHMOF} * R\%MOF + R_{expDHisophase} * R\%iso$$

Where,

$$R_{expDH} = \left( \frac{M_w [DHMOF]}{M_w [TiCaO_3]} \right) * R\%MOF + \left( \frac{M_w [DH iso - Linker phase]}{M_w [TiO_2]} \right) * R\%iso$$

Using the previously calculated R<sub>expDHisophase</sub> (from its experimental TGA profile) and R<sub>expDH</sub>, alongside with the mass fraction of each phase in the residue (R%iso and R%MOF):

$$R_{expDHMOF} = \left( \frac{R_{expDH} - (R_{expDHisoPhase} * R\%iso)}{R\%MOF} \right)$$

Then, since  $R_{expDHMOF} = \frac{M_w [DH MOF]}{M_w [TiCaO_3]}$  the molecular weight of MUV-10 can also be calculated to further validate the following calculations of the structure.

Based on <sup>1</sup>HNMR analysis we have proposed MUV-10 formula to be as follows: **TiCaO(H<sub>2</sub>O)<sub>w</sub>(btc)<sub>x</sub>(iso)<sub>y</sub>(fa)<sub>z</sub>(OH)<sub>D</sub>** where OH is introduced for charge balance.

First, we have calculated based on the dehydrated structures in which only btc and iso remain as ligands, hence using the experimental ratio at T410°C (R<sub>expDH</sub>), the temperature at which there will be iso linker phase in the form of Ti(iso)<sub>n</sub>(O)<sub>2-n</sub> and MOF in the form of TiCaO(btc)<sub>x</sub>(iso)<sub>y</sub>(O)<sub>(4-3x-2y)/2</sub>, as during the previous methodology.

The number of iso coming from the iso-Linker phase can be calculated by using our previously calculated iso/Titanium ratio.

$$(\text{iso}) \text{ in phase (P)} = \% \text{Ti isoPhase} * n\left(\frac{\text{iso}}{\text{Ti}}\right).$$

Where Ti% iso phase is the molar fraction of Ti belonging to the iso-Linker phase in comparison to MUV-10. Then, we can subtract the amount of iso forming the iso-linker phase from the total amount of iso present in the sample, which can be introduced as a function of the linker in order to later rearrange the equation through the molar ratio determined by  $^1\text{HNMR}$ :

$$\text{iso in MUV} - 10 = \left( \text{nmr} \left( \frac{\text{iso}}{\text{btc}} \right) * \text{xbtc} \right) - \text{iso in isoPhase(P)}$$

Substituting this in the experimental ratio between MUV-10 and its residue (previously calculated assuming a constant iso-Linker phase structure) results in btc determination within the MUV-10 structure, which then leads to the calculation of the other moieties as previously detailed.

$$R_{\text{expDHMOF}} = \left( \frac{M_w [\text{TiCaO}(\text{btc})_x(\text{iso})_{(x*\text{nmr}-P)}(\text{O})_{\frac{(4-3x-2*(x*\text{nmr}-P))}{2}}]}{M_w [\text{TiCaO}_3]} \right)$$

$$R_{\text{expDHMOF}} = \left( \frac{M_w [\text{TiCaO}] + x * M_w [\text{btc}] + (x*\text{nmr}-P) * M_w [\text{iso}] + \frac{(4-3x-2*(x*\text{nmr}-P))}{2} * M_w [\text{O}]}{M_w [\text{TiCaO}_3]} \right)$$

Rearranging the equation,

$$\begin{aligned} & x \text{ btc} \\ &= \left( \frac{R_{\text{expDHMOF}} * M_w [\text{TiCaO}_3] - M_w \text{TiCaO} + P * M_w [\text{iso}] - 2 * M_w [\text{O}] + P * M_w [\text{O}]}{M_w [\text{btc}] + \text{nmr} * M_w [\text{iso}] - \frac{3 + 2\text{nmr}}{2} * M_w [\text{O}]} \right) \end{aligned}$$

Once x is obtained, the number of iso in MUV-10 can be obtained applying the previously discussed formula:

$$\text{iso in MUV} - 10 (\text{N}) = \left( \text{nmr} \left( \frac{\text{iso}}{\text{btc}} \right) * \text{xbtc} \right) - \text{iso in isoPhase(P)}$$

Based on the previously discussed  $^1\text{HNMR}$  ratio the fa content can be obtained as a function of btc, being  $Z = X * \text{NMR} \left( \frac{\text{fa}}{\text{btc}} \right)$ .

The values are tabulated in **Table S18**, alongside with calculation of charge provided by the anions in the MUV-10 having to compensate for Ti and Ca as follows:

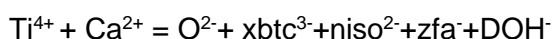

In cases in which the charge is not fully compensated by the present species, the number of  $\text{OH}^-$  species needed to compensate the charge are calculated using the following equation:

$$4\text{Ti} + 2\text{Ca} = 2\text{O} + 3\text{Xbtc} + 2(\text{XRnmriso} - \text{P}) + \text{XRnmrfa} + \text{D OH},$$

Hence,

$$\text{D OH} = 4 + 2\text{P} - \text{X}(3\text{btc} + 2\text{Rnmriso} + \text{Rnmrfa})$$

To calculate the number of water molecules a similar approach is employed. Since

$$R_{\text{exp}} = \left( \frac{M_w [\text{MOF}] + w * M_w [\text{H}_2\text{O}]}{M_w [\text{TiCaO}_3]} \right) * R\% \text{MOF} + \left( \frac{M_w [\text{iso} - \text{Linker phase}]}{M_w [\text{TiO}_2]} \right) * R\% \text{Iso}$$

Then

$$w M_w [\text{H}_2\text{O}] = \frac{\left( \frac{(R_{\text{exp}} - R_{\text{expisoPhase}} * R\% \text{iso}) * [\text{TiCaO}_3]}{R\% \text{MOF}} \right) - M_w [\text{MOF}]}{M_w [\text{H}_2\text{O}]}$$

Once the MOF structure is determined, its molecular weight can be used to determine the mass fraction of MUV-10 and iso-phase (S%MOF and S%iso) in the overall structure.

$$S\% \text{MOF} = \left( \frac{M_w [\text{MOF}] * \text{Molar fraction (Ti) MOF}}{(M_w [\text{MOF}] * \text{Molar fraction (Ti) MOF} + M_w [\text{iso-Linker}] * \text{Molar fraction (Ti) iso-Linker phase})} \right)$$

**Tables S18** and **S19** show the tabulated values for the determination of MUV-10 structure within the iso-Linker phase@MUV-10 composite for MUV-10-iso H, alongside with the mass fraction of iso-Linker phase (R%iso) in the residue (TiCaO<sub>3</sub> and TiO<sub>2</sub>).

**Table S18:** Tabulated values extracted from the analysis of the thermogravimetric profiles of MUV-10-iso H using the previously discussed formulas based on the ratios between the frameworks and their residues, given in Table S13, normalizing the extra Titanium per cent to their mass residues. The number of molecules (either btc, iso or fa correspond to the estimates structure [TiCaO(H<sub>2</sub>O)<sub>w</sub>(btc)<sub>x</sub>(iso)<sub>y</sub>(fa)<sub>z</sub>(OH)<sub>D</sub>] of the Iso-Linker@MUV-10 Composite, in which if defect-free there are 1.33 btc linkers.

| Sample      | %R iso | P<br>iso in<br>iso-linker | btc   | fa    | iso   | OH     | H <sub>2</sub> O |
|-------------|--------|---------------------------|-------|-------|-------|--------|------------------|
| MUV-10<br>H | 0      | N/A                       | 1.403 | 0.015 | 0     | -0.237 | 1.67             |
| iso20%-H    | -0.085 | 0.000                     | 1.282 | 0.014 | 0.017 | 0.105  | 1.61             |
| iso33%-H    | -0.062 | 0.000                     | 1.291 | 0.025 | 0.031 | 0.041  | 2.10             |
| iso43%-H    | 0.099  | 0.044                     | 1.241 | 0.012 | 0.001 | 0.263  | 4.04             |
| iso83%-H    | -0.022 | 0.000                     | 1.087 | 0.055 | 0.253 | 0.177  | 2.89             |
| iso91%-H    | 0.081  | 0.036                     | 1.031 | 0.095 | 0.384 | 0.043  | 4.06             |
| iso98%-H    | -0.006 | 0.000                     | 0.785 | 0.008 | 0.651 | 0.335  | 1.73             |

\*Note that the extra ti% has been corrected with MUV-10-H values, resulting in some cases as negative values, which have been included as 0 during the calculations.

**Table S19:** Calculated values for iso-Linker@[TiCaO(H<sub>2</sub>O)<sub>w</sub>(btc)<sub>x</sub>(iso)<sub>y</sub>(fa)<sub>z</sub>(OH)<sub>D</sub>] from iso%- H , enclosing number and per cent of missing linkers, validation of the calculations with R<sub>theo</sub> and the calculated mass fraction of the iso-Linker and of MUV-10.

| Sample          | Missing Linker | ML %  | R <sub>theo</sub> | Coordination positions | Mass fraction iso-phase | Mass fraction MUV-10 |
|-----------------|----------------|-------|-------------------|------------------------|-------------------------|----------------------|
| <b>MUV-10 H</b> | -0.073         | -5.2  | 3.12              | 12.89                  | 0                       | 1                    |
| <b>iso20%-H</b> | 0.051          | 3.80  | 3.00              | 12.50                  | 0.000                   | 1.000                |
| <b>iso33%-H</b> | 0.042          | 3.16  | 3.10              | 13.06                  | 0.000                   | 1.000                |
| <b>iso43%-H</b> | 0.092          | 6.92  | 3.25              | 14.78                  | 0.052                   | 0.948                |
| <b>iso83%-H</b> | 0.246          | 18.43 | 3.18              | 13.71                  | 0.000                   | 1.000                |
| <b>iso91%-H</b> | 0.302          | 22.64 | 3.53              | 15.02                  | 0.040                   | 0.960                |
| <b>iso98%-H</b> | 0.548          | 41.08 | 3.05              | 12.39                  | 0.000                   | 1.000                |

The values obtained by the different models show that defective TiCaO(H<sub>2</sub>O)<sub>w</sub>(btc)<sub>x</sub>(iso)<sub>y</sub>(fa)<sub>z</sub>(OH)<sub>D</sub> is the best structural match. Although the extra per cent of Ti is low (ca. 5% maximum), as it does not decompose during the TGA profiles it highly affects the structure composition if assumed that it is forming TiO<sub>2</sub>, resulting in remarkably high coordination numbers that indicate that there is no plausible way that it comes from TiO<sub>2</sub> formation. Structural composition does not change drastically if it is assumed that the extra Ti comes from the formation of the iso100% phase, but higher coordination numbers than for the pure phase defective structure are obtained, indicating together with FT-IR and with the TGA profiles that iso100% this is not a good model.

### S.5.4.2 Thermo Gravimetric Analysis of benzo%-H series.

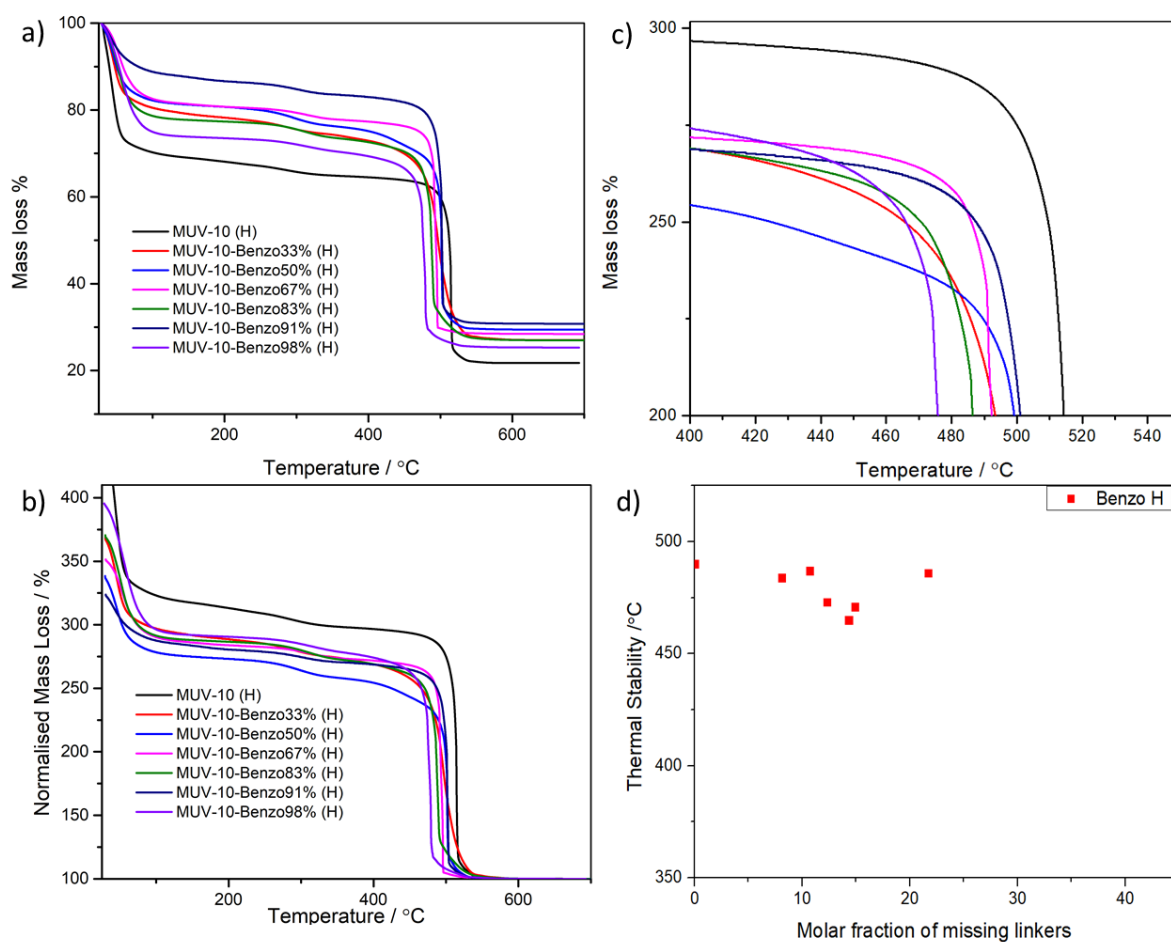

**Figure S15:** TGA profiles of MUV-10 and benzo%-H samples normalized to a) the start of the decomposition and b) the mass of the residue. c) zoom of the temperature of the last decomposition step. d) Temperature of the last decomposition step as a function of the molar percent of missing linkers, showing a minimum decrease in thermal stability.



**Table S20:** Tabulated values of the experimental MOF/residue ratio of benzo%-H samples.

| Sample     | $R_{exp}$ | $R_{expDH}$ |
|------------|-----------|-------------|
| MUV-10     | 3.12      | 2.89        |
| benzo33%-H | 2.89      | 2.53        |
| benzo50%-H | 2.73      | 2.41        |
| benzo67%-H | 2.85      | 2.66        |
| benzo83%-H | 2.87      | 2.60        |
| benzo91%-H | 2.82      | 2.65        |
| benzo98%-H | 2.88      | 2.59        |

**Table S21:** Tabulated calculations of the number of btc, benzo and missing linker based on the experimental MOF/residue ratio of benzo%-H for a **defective**  $[TiCaO(H_2O)_w(btc)_x(benzo)_y(fa)_z(OH)_d]$  MOF structure.

| Sample     | btc   | fa    | benzo | OH     | H <sub>2</sub> O | ML     | ML%  | CP    |
|------------|-------|-------|-------|--------|------------------|--------|------|-------|
| MUV-10     | 1.403 | 0.014 | 0.000 | -0.223 | 2.0              | -0.073 | -5.2 | 13.04 |
| benzo33%-H | 1.135 | 0.024 | 0.002 | 0.570  | 2.4              | 0.199  | 14.9 | 12.81 |
| benzo50%-H | 1.045 | 0.010 | 0.003 | 0.853  | 2.0              | 0.289  | 21.7 | 12.11 |
| benzo67%-H | 1.226 | 0.089 | 0.011 | 0.224  | 1.1              | 0.108  | 8.1  | 11.92 |
| benzo83%-H | 1.169 | 0.031 | 0.030 | 0.432  | 1.8              | 0.164  | 12.3 | 12.33 |
| benzo91%-H | 1.191 | 0.031 | 0.054 | 0.341  | 1.0              | 0.142  | 10.7 | 11.71 |
| benzo98%-H | 1.142 | 0.056 | 0.061 | 0.455  | 1.8              | 0.191  | 14.3 | 12.39 |

**Table S22:** Tabulated calculations of the number of btc, benzo and missing linker based on the experimental MOF/residue ratio of benzo%-H for a defective  $\text{TiO}_2@[\text{TiCaO}(\text{H}_2\text{O})_w(\text{btc})_x(\text{benzo})_y(\text{fa})_z(\text{OH})_D]$  MOF structure, with Ti content calculated by EDX. The calculated btc exceeds the number of linker in the pristine structure, with consequent negative OH- ligands compensating for the positive charge. This, together with the fact that ICP analysis differed from EDX measurements, showing great Ti/Ca ratios, brought us to use the  $[\text{TiCaO}(\text{H}_2\text{O})_w(\text{btc})_x(\text{benzo})_y(\text{fa})_z(\text{OH})_D]$  model for further analysis. Although the mass fraction of  $\text{TiO}_2$  ( $\text{S\%TiO}_2$ ) is small (max. 9 mass%), its impact in TGA analysis is noticeable, as it does not decompose and alters the materials profiles significantly. Additionally, despite EDX measurements indicate a higher Ti content, ICP revealed 50.1 Ti% while EDX determined a 57. Ti%.

| Sample         | R%TiO <sub>2</sub> | btc   | fa    | benzo | OH     | H <sub>2</sub> O | ML%    | CP     | S% TIO <sub>2</sub> |
|----------------|--------------------|-------|-------|-------|--------|------------------|--------|--------|---------------------|
| MUV-10         | 0.072              | 1.511 | 0.015 | 0.000 | -0.548 | 2.1              | -13.98 | 13.66  | 0.023               |
| benzo3<br>3%-H | 0.170              | 1.367 | 0.030 | 0.002 | -0.135 | 3.3              | -2.55  | 14.422 | 0.059               |
| benzo5<br>0%-H | 0.255              | 1.402 | 0.014 | 0.005 | -0.228 | 3.3              | -5.15  | 14.572 | 0.093               |
| benzo6<br>7%-H | 0.147              | 1.437 | 0.104 | 0.012 | -0.440 | 1.7              | -7.80  | 13.177 | 0.052               |
| benzo8<br>3%-H | 0.175              | 1.417 | 0.037 | 0.037 | -0.363 | 2.7              | -6.33  | 14.084 | 0.061               |
| benzo9<br>1%-H | 0.103              | 1.328 | 0.035 | 0.061 | -0.139 | 1.7              | 0.40   | 12.806 | 0.036               |
| benzo9<br>8%-H | -0.123             | 1.017 | 0.050 | 0.054 | 0.790  | 1.7              | 23.69  | 11.875 | -0.043              |

### S.5.5. Computational simulations of defective MUV-10 phases.

#### S.5.5.1 Defect energetics

To simulate defective MUV-10 phases, both the lattice parameter and atomic position of pristine MUV-10 were relaxed. Then, one btc per unit cell was manually exchanged by a modulator (iso, benzo, AcOH or fa) and enough OH<sup>-</sup> anions for overall charge compensation. Next, atomic positions were further relaxed keeping the lattice parameters constant.

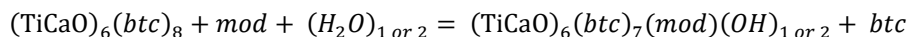

The energy balance required for introducing a missing linker in MUV-10 was calculated via:

$$E = E_{(\text{TiCaO})_6(\text{btc})_7(\text{mod})(\text{OH})_{1 \text{ or } 2}} + E_{\text{btc}} - E_{(\text{TiCaO})_6(\text{btc})_8} - E_{\text{mod}} - (1 \text{ or } 2) E_{\text{H}_2\text{O}}$$

**Table S23:** Energy balance E(eV) required for replacing one btc in MUV-10 by a iso, benzo, AcOH or fa molecule.

| molecule | E(eV) |
|----------|-------|
| Iso      | -1.45 |
| benzo    | -1.09 |
| AcOH     | -0.65 |
| fa       | -1.06 |

## S.6. MUV-10 modulation in linker deficient conditions: characterization of MUV-10 iso%-L samples.

### S.6.1 PXRD of MUV-10 iso%-L.

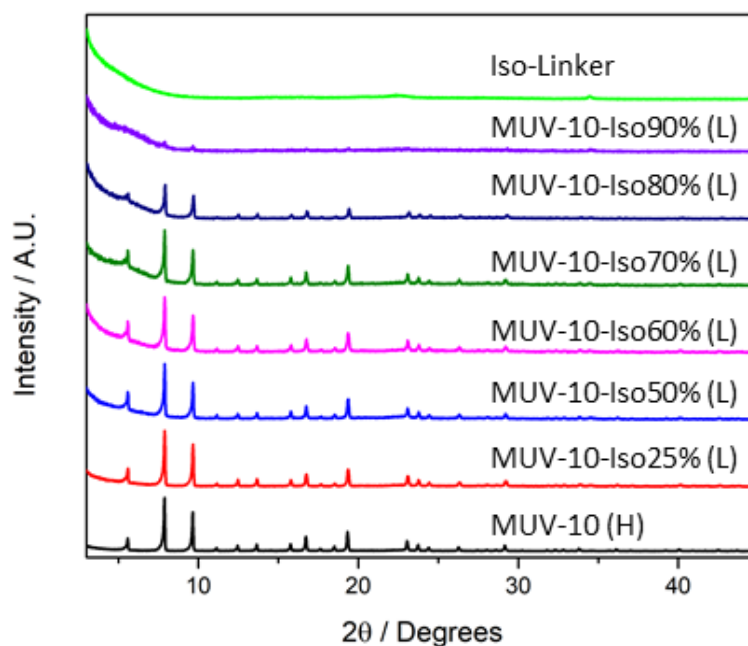

**Figure S16:** PXRD pattern of iso%-L series showing a remarkable increase in intensity at low reflection angles associated with a decrease in crystallinity, when the quantity of isophthalic acid added to the synthetic mixture increases, suggesting the formation of the iso 100% phase.

### S.6.2 Incorporation of modulators in MUV-10 iso%-L as estimated with $^1\text{H}$ -NMR.

**Table S24:** Tabulated  $^1\text{H}$ -NMR data from acid digested iso%-L series, showing the modulator content increasing with the addition of modulator.

| Sample   | iso mol % | fa mol % | iso ratio | fa ratio |
|----------|-----------|----------|-----------|----------|
| iso25%-L | 9.12      | 10.75    | 0.100     | 0.120    |
| iso50%-L | 19.54     | 24.83    | 0.243     | 0.330    |
| iso60%-L | 22.39     | 12.61    | 0.288     | 0.144    |
| iso70%-L | 33.15     | 40.28    | 0.496     | 0.674    |
| iso80%-L | 41.27     | 20.19    | 0.703     | 0.253    |
| iso90%-L | 64.38     | 56.54    | 1.807     | 1.301    |

### S.6.3 FT-IR of MUV-10 iso%-L.

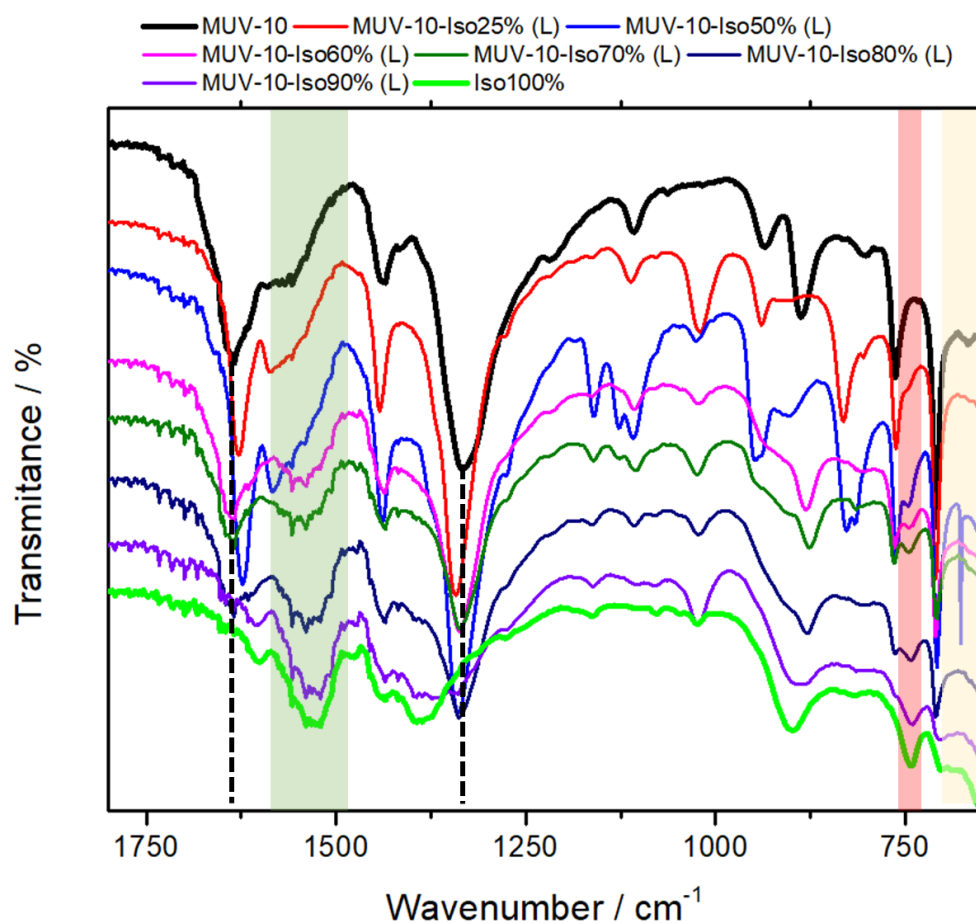

**Figure S17:** Comparison of FT-IR profiles of MUV-10-H, iso 100% and iso%-L series showing characteristic vibration bands from the last but no free carboxylate vibrations ( $1700\text{ cm}^{-1}$ , Figure S9) confirming modulator's attachment to the metal clusters. A gradual shift towards the iso 100% phase carboxylate (green) and metallic vibration bands (yellow) is apparent since the addition of small quantities of modulator, whereas changes in the eskeleton vibration band at  $742\text{ cm}^{-1}$  (red) are less significant than for iso%-H phases (Figure S8), suggesting the last band to be an indicator of Is incorporation, but not exclusively of the iso 100% phase. Shifting in the two major MUV-10 vibration bands (dashed) are observed, suggesting that MUV-10 and iso 100% phases are intergrowing and not only forming as independent frameworks.

#### S.6.4. Molar per cent of metals in MUV-10 iso%-L

**Table S25:** Tabulated metal content of iso%-L series.

| Sample          | EDX   |       | ICP   |       |
|-----------------|-------|-------|-------|-------|
|                 | % Ca  | % Ti  | % Ca  | % Ti  |
| <b>MUV-10 H</b> | 46.70 | 53.30 | 46.47 | 53.53 |
| iso25%-L        | 37.28 | 62.72 | n/a   | n/a   |
| iso50%-L        | 27.5  | 72.5  | n/a   | n/a   |
| iso60%-L        | 25.99 | 74.01 | n/a   | n/a   |
| iso70%-L        | 20.75 | 79.25 | 21.81 | 78.19 |
| iso80%-L        | 16.65 | 83.35 | n/a   | n/a   |
| iso90%-L        | 3.42  | 96.58 | 4.62  | 95.38 |

This indicates, in great agreement with previous FT-IR discussion, that iso 100% phase (formed of Ti and iso) forms along with MUV-10 phase in the MUV-10 iso%-L series.

### S.6.5. Thermo Gravimetric Analysis of MUV-10 iso%-L.

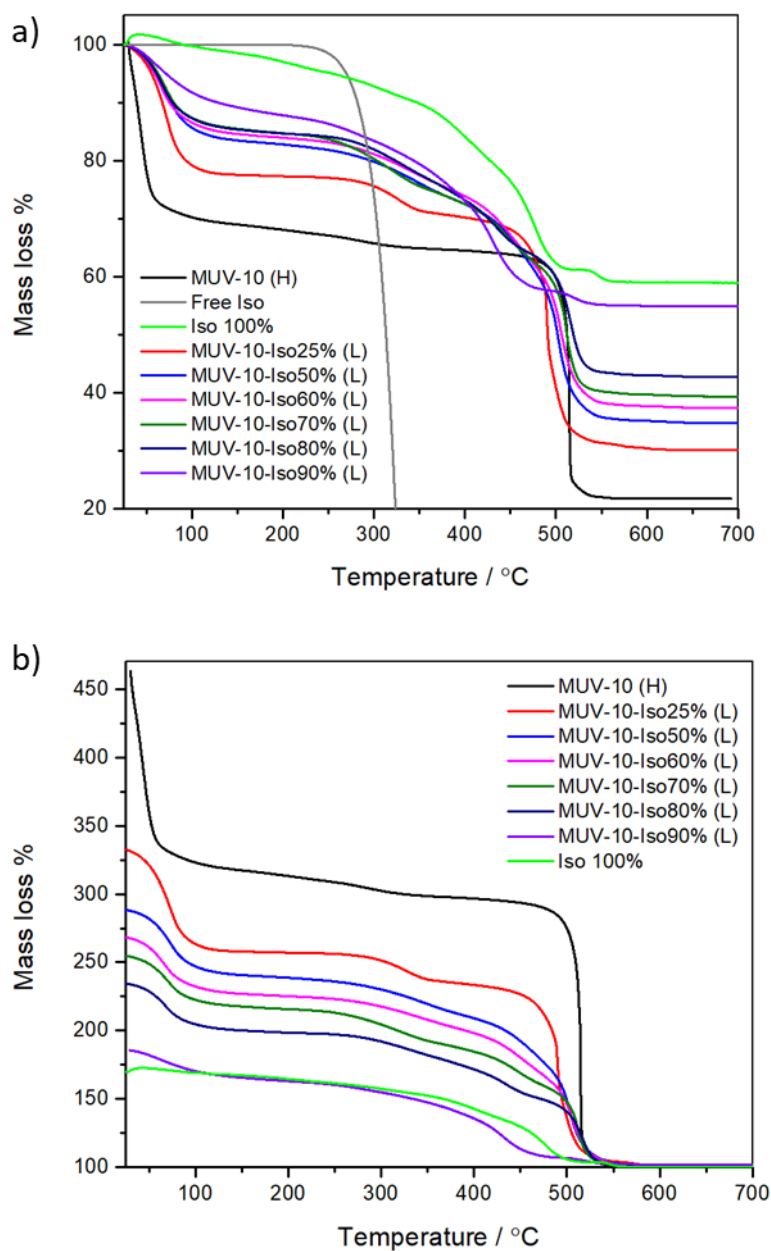

**Figure S18:** TGA profiles of MUV-10, iso 100% and iso%-L samples normalized to a) the start of the decomposition, b) the mass of the residue. The formation of the amorphous phase 'iso100%', which thermal decomposition is more gradual than MUV-10, is translated to the thermal decomposition profiles of the iso%-L series, in which a decrease in thermal stability, with more gradual decomposition profiles, is observed. However, the gradual decomposition does not allow to accurately determine the temperature of the last decomposition step.

**-Model structure:**  $[\text{TiCaO}(\text{H}_2\text{O})_w(\text{btc})_x(\text{iso})_y(\text{fa})_z(\text{OH})_D]^{13}$

The calculations are performed using the model detailed in S.5.4.

**Table S26:** Calculated structures  $[\text{TiCaO}(\text{H}_2\text{O})_w(\text{btc})_x(\text{iso})_y(\text{fa})_z(\text{OH})_D]$  by assuming a 1:1 Ti: Ca ratio, enclosing the number of molecules, number and per cent of missing linkers, validation of the calculations with  $R_{\text{theoDH}}$  and MUV-10 coordination positions, showing a drastic decrease in the coordination positions that confirms that the samples are not only defective MUV-10.

| Sample          | btc   | fa    | iso   | OH         | H <sub>2</sub> O | Missing Linker | ML%   | $R_{\text{theoDH}}$ | CP    |
|-----------------|-------|-------|-------|------------|------------------|----------------|-------|---------------------|-------|
| <b>MUV-10</b>   | 1.403 | 0.014 | 0.000 | -<br>0.223 | 2.0              | -0.073         | -5.25 | 2.89                | 13.04 |
| <b>iso25%-L</b> | 0.934 | 0.112 | 0.094 | 0.899      | 0.8              | 0.396          | 29.94 | 2.36                | 10.93 |
| <b>iso50%-L</b> | 0.726 | 0.240 | 0.176 | 1.230      | 0.3              | 0.604          | 45.53 | 2.17                | 10.10 |
| <b>iso60%-L</b> | 0.638 | 0.092 | 0.184 | 1.626      | 0.4              | 0.692          | 52.13 | 2.06                | 9.73  |
| <b>iso70%-L</b> | 0.482 | 0.325 | 0.239 | 1.750      | 0.2              | 0.848          | 63.82 | 1.91                | 9.44  |
| <b>iso80%-L</b> | 0.383 | 0.097 | 0.269 | 2.214      | 0.0              | 0.947          | 71.22 | 1.81                | 8.76  |
| <b>iso90%-L</b> | 0.099 | 0.128 | 0.291 | 2.994      | -<br>0.6         | 1.231          | 92.58 | 1.45                | 7.45  |



**-Model structure:**  $\text{TiO}_2@[\text{TiCaO}(\text{H}_2\text{O})_w(\text{btc})_x(\text{iso})_y(\text{fa})_z(\text{OH})_D]^{13}$

The calculations are performed using the model detailed in **S.5.4**.

**Tables S27** and **S28** show the tabulated values obtained by assuming that the extra Titanium (compared to Calcium) is forming  $\text{TiO}_2$ , showing remarkably high negative values for  $\text{OH}^-$  defect compensating species, (with consequently a drastically high number of water coordinated molecules) in addition to a remarkably high presence of btc (pristine or higher than pristine) and a subsequent high amount of iso in the structure. This leads to impossible coordination numbers (reaching 75 coordination positions) and shows that there is no plausible way that the extra titanium will be coming from the formation of  $\text{TiO}_2$ .

**Table S27:** Calculated structures  $\text{TiO}_2@[\text{TiCaO}(\text{H}_2\text{O})_w(\text{btc})_x(\text{iso})_y(\text{fa})_z(\text{OH})_D]$  by assuming that the titanium in excess in comparison to calcium is in the form of  $\text{TiO}_2$ .

| Sample          | %R $\text{TiO}_2$ | %R MOF | btc   | fa      | iso   | OH     | $\text{H}_2\text{O}$ |
|-----------------|-------------------|--------|-------|---------|-------|--------|----------------------|
| <b>MUV-10</b>   | 0.072             | 0.928  | 1.511 | 0.01511 | 0.000 | -0.548 | 2.1                  |
| <b>iso25%-L</b> | 0.286             | 0.714  | 1.308 | 0.15750 | 0.131 | -0.344 | 2.7                  |
| <b>iso50%-L</b> | 0.490             | 0.510  | 1.424 | 0.47034 | 0.346 | -1.433 | 4.6                  |
| <b>iso60%-L</b> | 0.520             | 0.480  | 1.331 | 0.19190 | 0.384 | -0.951 | 5.2                  |
| <b>iso70%-L</b> | 0.624             | 0.376  | 1.281 | 0.86367 | 0.635 | -1.976 | 7.6                  |
| <b>iso80%-L</b> | 0.702             | 0.298  | 1.286 | 0.32520 | 0.903 | -1.989 | 9.9                  |
| <b>iso90%-L</b> | 0.941             | 0.059  | 1.677 | 2.18268 | 4.948 | -13.11 | 51.7                 |

**Table S28:** Calculated structures enclosing the number and per cent of missing linkers, validation of the calculations with  $R_{\text{theo}}$  and the calculated mass fraction of MUV-10 and its coordination positions.

| Sample          | Missing Linker | ML %   | $R_{\text{theo}}$ | Mass fraction MUV-10 | Coordination positions |
|-----------------|----------------|--------|-------------------|----------------------|------------------------|
| <b>MUV-10</b>   | -0.178         | -13.33 | 3.12              | 0.977                | 13.66                  |
| <b>iso25%-L</b> | 0.025          | 1.89   | 2.56              | 0.888                | 14.08                  |
| <b>iso50%-L</b> | -0.090         | -6.78  | 2.36              | 0.792                | 17.03                  |
| <b>iso60%-L</b> | 0.003          | 0.21   | 2.24              | 0.768                | 17.13                  |
| <b>iso70%-L</b> | 0.053          | 3.95   | 2.14              | 0.709                | 20.54                  |
| <b>iso80%-L</b> | 0.048          | 3.57   | 1.98              | 0.646                | 22.94                  |
| <b>iso90%-L</b> | -0.344         | -25.81 | 1.61              | 0.415                | 75.85                  |

**-Model structure accounts for a combination of iso 100% and defective MUV-10 phases: iso-Linker@[TiCaO(H<sub>2</sub>O)<sub>w</sub>(btc)<sub>x</sub>(iso)<sub>y</sub>(fa)<sub>z</sub>(OH)<sub>D</sub>]**

As envisioned in the representation of the TGA profiles (**Figure S18**), in MUV-10-iso 90% either MUV-10, the iso-Linker phase or both are highly defective, and its composition cannot be calculated. In the rest of the samples, both the mass fraction of the iso-Linker phase and MUV-10 defectivity increase with iso addition, as tabulated in **Tables S29** and **S30**. MUV-10 coordination positions are close to 13 in all cases, indicating a good fit between the real structure and the proposed model.

**Table S29:** Tabulated values extracted from the analysis of the thermogravimetric profiles by using the previously discussed formulas based on the ratios between the frameworks and their residues, normalizing the extra Titanium per cent to their mass residues. The number of molecules (either btc, iso or fa correspond to the estimated structure [TiCaO(H<sub>2</sub>O)<sub>w</sub>(btc)<sub>x</sub>(iso)<sub>y</sub>(fa)<sub>z</sub>(OH)<sub>D</sub>].

| Sample          | %R iso | P     | btc    | fa     | iso    | OH     | H <sub>2</sub> O |
|-----------------|--------|-------|--------|--------|--------|--------|------------------|
| <b>MUV-10</b>   | 0      | N/A   | 1.403  | 0.000  | 0.014  | -0.237 | 2.0              |
| <b>iso25%-L</b> | 0.290  | 0.113 | 1.254  | 0.151  | 0.013  | 0.061  | 1.50             |
| <b>iso50%-L</b> | 0.497  | 0.172 | 1.228  | 0.406  | 0.126  | -0.343 | 1.67             |
| <b>iso60%-L</b> | 0.528  | 0.180 | 1.106  | 0.160  | 0.139  | 0.244  | 1.83             |
| <b>iso70%-L</b> | 0.633  | 0.205 | 0.933  | 0.629  | 0.258  | 0.055  | 2.56             |
| <b>iso80%-L</b> | 0.712  | 0.222 | 0.811  | 0.205  | 0.348  | 0.666  | 2.45             |
| <b>iso90%-L</b> | 0.957  | 0.268 | -0.101 | -0.132 | -0.567 | 5.570  | 7.78             |

**Table S30:** Calculated structures enclosing number and per cent of missing linkers, validation of the calculations with  $R_{\text{theo}}$  and the calculated mass fraction of the iso 100% and MUV-10 phases.

| Sample          | ML         | ML %  | $R_{\text{theo}}$ | CP    | Mass fraction iso-Linker | Mass Fraction MUV-10 | Fraction of iso in iso-Linker |
|-----------------|------------|-------|-------------------|-------|--------------------------|----------------------|-------------------------------|
| <b>MUV-10</b>   | -<br>0.073 | -5.25 | 3.12              | 13.04 | 0                        | 1                    | 0                             |
| <b>iso25%-L</b> | 0.079      | 5.93  | 2.56              | 12.44 | 0.182                    | 0.818                | 0.896                         |
| <b>iso50%-L</b> | 0.105      | 7.85  | 2.36              | 13.01 | 0.339                    | 0.661                | 0.578                         |
| <b>iso60%-L</b> | 0.227      | 17.00 | 2.24              | 12.59 | 0.379                    | 0.621                | 0.565                         |
| <b>iso70%-L</b> | 0.400      | 29.98 | 2.14              | 13.51 | 0.476                    | 0.524                | 0.443                         |
| <b>iso80%-L</b> | 0.522      | 39.14 | 1.98              | 12.79 | 0.579                    | 0.421                | 0.390                         |

|          |       |        |      |       |       |       |        |
|----------|-------|--------|------|-------|-------|-------|--------|
| iso90%-L | 1.434 | 107.58 | 1.61 | 13.21 | 0.957 | 0.043 | -0.895 |
|----------|-------|--------|------|-------|-------|-------|--------|

## S.7. MUV-10 modulation in linker deficient conditions: characterization of MUV-10 benzo%-L samples.

### S.7.1 PXRD of MUV-10 benzo%-L.

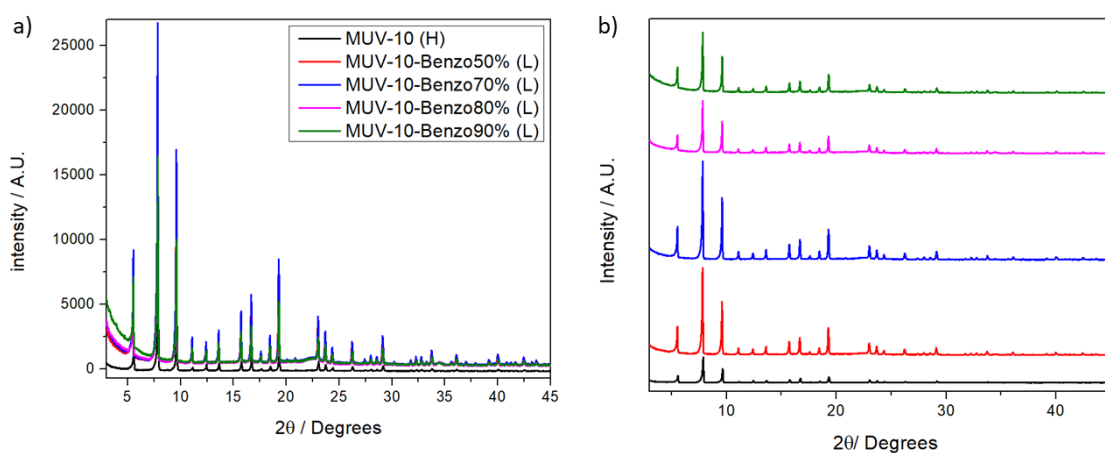

**Figure S19:** PXRD patterns of benzo%-L series showing high crystallinity and phase purity. It is worth noting that an increase in the intensity of the diffraction lines at low reflection angles is observed for increasing quantities of benzoic acid added to the synthetic mixture.

### S.7.2 Incorporation of modulators in MUV-10 benzo%-L as estimated with $^1\text{H}$ -NMR.

**Table S31:** Tabulated data extracted from acid digested  $^1\text{H}$ NMR of benzo%-L series, showing benzo and formic acid content increasing with the addition of modulator.

| Sample     | benzo mol % | fa mol % | benzo ratio | fa ratio |
|------------|-------------|----------|-------------|----------|
| benzo25%-L | 0.971       | 15.106   | 0.010       | 0.178    |
| benzo50%-L | 1.255       | 18.078   | 0.013       | 0.221    |
| benzo70%-L | 1.807       | 12.764   | 0.018       | 0.146    |
| benzo80%-L | 2.994       | 19.304   | 0.031       | 0.239    |

### S.7.3 FT-IR of MUV-10 benzo%-L.

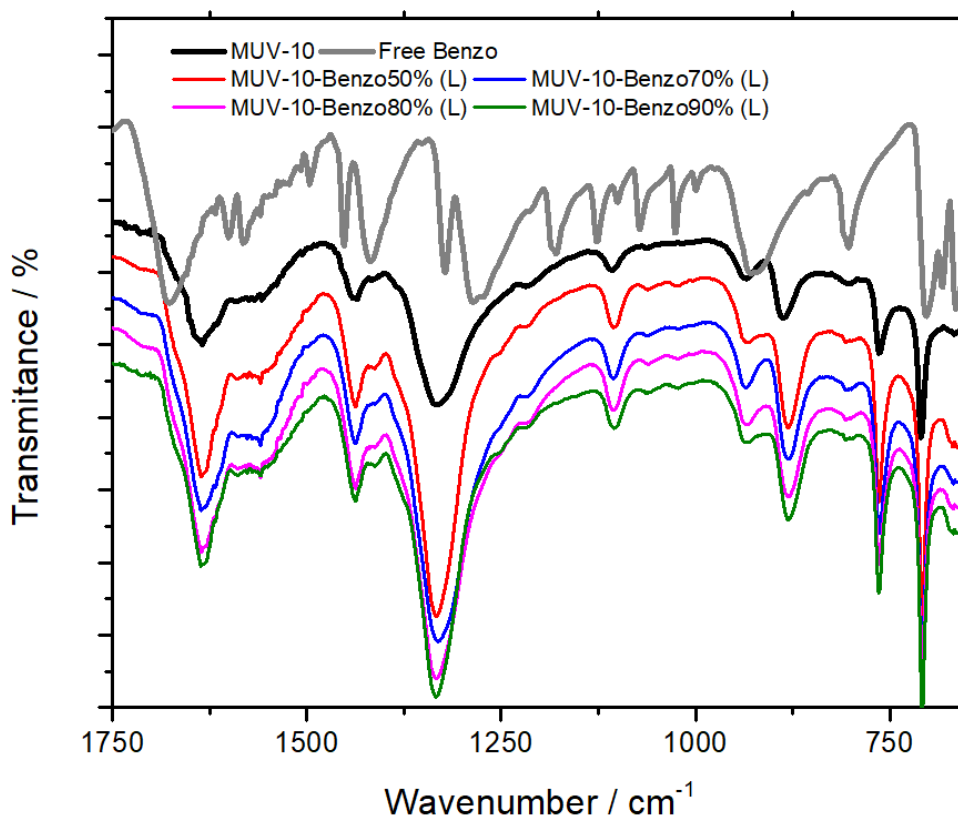

**Figure S20:** FT-IR of benzo%- L compared with MUV-10-H and free modulator, showing no free carboxylate vibration band (ca. 1700cm<sup>-1</sup>) and changes in the metal vibration bands at ca. 650 cm<sup>-1</sup>, confirming its attachment to the metal clusters.

### S.7.4. Molar per cent of metals in MUV-10 benzo%-L.

**Table S32:** Tabulated metal content of benzo%-L series.

| Sample     | EDX   |       | ICP    |        |
|------------|-------|-------|--------|--------|
|            | % Ca  | % Ti  | % Ca   | % Ti   |
| MUV-10 H   | 46.70 | 53.30 | 46.47  | 53.53  |
| benzo25%-L | 41.40 | 58.60 | n/a    | n/a    |
| benzo50%-L | 41.59 | 58.41 | n/a    | n/a    |
| benzo70%-L | 40.62 | 59.38 | n/a    | n/a    |
| benzo80%-L | 34.65 | 65.35 | 40.041 | 59.959 |

### S.7.5. Thermo Gravimetric Analysis MUV-10 benzo%-L series

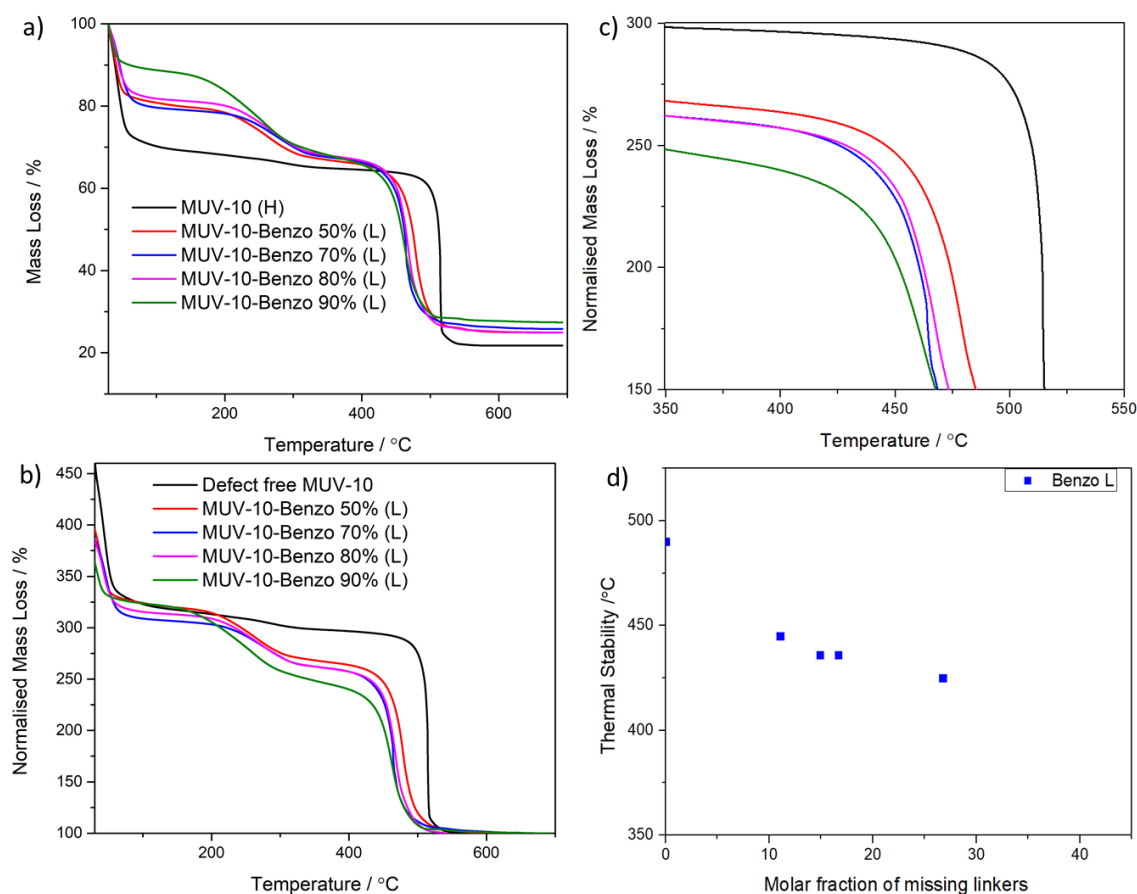

**Figure S21:** Representation of the TGA profile of benzo%-L series. A) Normalised to starting mass a 100%, showing higher metal content and b) normalised to residue as a 100%, a lower linker decomposition profile step and a higher per cent of defect-compensating species. c) zoom of the temperature of the last decomposition step. d) Temperature of the last decomposition step as a function of the molar percent of missing linkers, showing a decrease in thermal stability related to the sample's defectivity.

The same calculations performed for benzo%-H phases (Section S.5.4) were applied to the benzo%-L series yielding the information presented below:

**-Model structure:**  $[\text{TiCaO}(\text{H}_2\text{O})_w(\text{btc})_x(\text{iso})_y(\text{fa})_z(\text{OH})_b]^{13}$

**Table S33:** Tabulated calculations of benzo%-L composition on the experimental MOF/residue ratio by assuming this model.

| Sample     | $R_{\text{exp}}$ | $R_{\text{expDH}}$ | btc   | fa    | benzo | OH     | H <sub>2</sub> O |
|------------|------------------|--------------------|-------|-------|-------|--------|------------------|
| MUV-10     | 3.12             | 2.89               | 1.403 | 0.014 | 0.000 | -0.223 | 2.0              |
| benzo25%-L | 3.10             | 2.61               | 1.186 | 0.211 | 0.012 | 0.220  | 3.2              |
| benzo50%-L | 3.04             | 2.54               | 1.135 | 0.250 | 0.014 | 0.331  | 3.1              |
| benzo70%-L | 3.07             | 2.51               | 1.111 | 0.163 | 0.020 | 0.484  | 3.6              |
| benzo80%-L | 3.10             | 2.34               | 0.977 | 0.234 | 0.030 | 0.806  | 4.8              |

**Table S34:** Tabulated calculations of the number of btc, benzo and missing linker based on the experimental MOF/residue ratio by assuming this model.

| Sample     | Missing Linker | ML%   | Coordination positions |
|------------|----------------|-------|------------------------|
| MUV-10     | -0.073         | -5.25 | 13.04                  |
| benzo25%-L | 0.148          | 11.07 | 13.96                  |
| benzo50%-L | 0.199          | 14.90 | 13.76                  |
| benzo70%-L | 0.222          | 16.66 | 14.14                  |
| benzo80%-L | 0.357          | 26.74 | 15.04                  |

**-Model structure:**  $\text{TiO}_2@[\text{TiCaO}(\text{H}_2\text{O})_w(\text{btc})_x(\text{iso})_y(\text{fa})_z(\text{OH})_D]^{13}$

**Table S35:** Tabulated calculations of the number of btc, benzo and missing linker based on the experimental MOF/residue ratio by assuming this model. Note that the negative OH- values have been omitted when calculating the number of  $\text{H}_2\text{O}$ , otherwise it would be even higher.

| Sample      | R%<br>$\text{TiO}_2$ | btc   | fa    | benzo | OH     | $\text{H}_2\text{O}$ | ML%    | CP    | S%<br>$\text{TiO}_2$ |
|-------------|----------------------|-------|-------|-------|--------|----------------------|--------|-------|----------------------|
| MUV-10      | 0.072                | 1.511 | 0.015 | 0.000 | -0.548 | 2.1                  | -13.36 | 13.66 | 0.023                |
| benzo 25%-L | 0.196                | 1.475 | 0.262 | 0.014 | -0.717 | 3.8                  | -2.55  | 14.42 | 0.063                |
| benzo 50%-L | 0.192                | 1.404 | 0.310 | 0.018 | -0.558 | 3.9                  | -5.15  | 14.57 | 0.063                |
| benzo 70%-L | 0.213                | 1.413 | 0.207 | 0.026 | -0.497 | 4.8                  | -7.80  | 13.18 | 0.070                |
| benzo 80%-L | 0.342                | 1.485 | 0.355 | 0.046 | -0.902 | 7.8                  | -6.33  | 14.08 | 0.110                |

## S.8. Effect of modulation in the properties of MUV-10 H defective phases

### S.8.1. Morphology and particle size of iso%-H series.

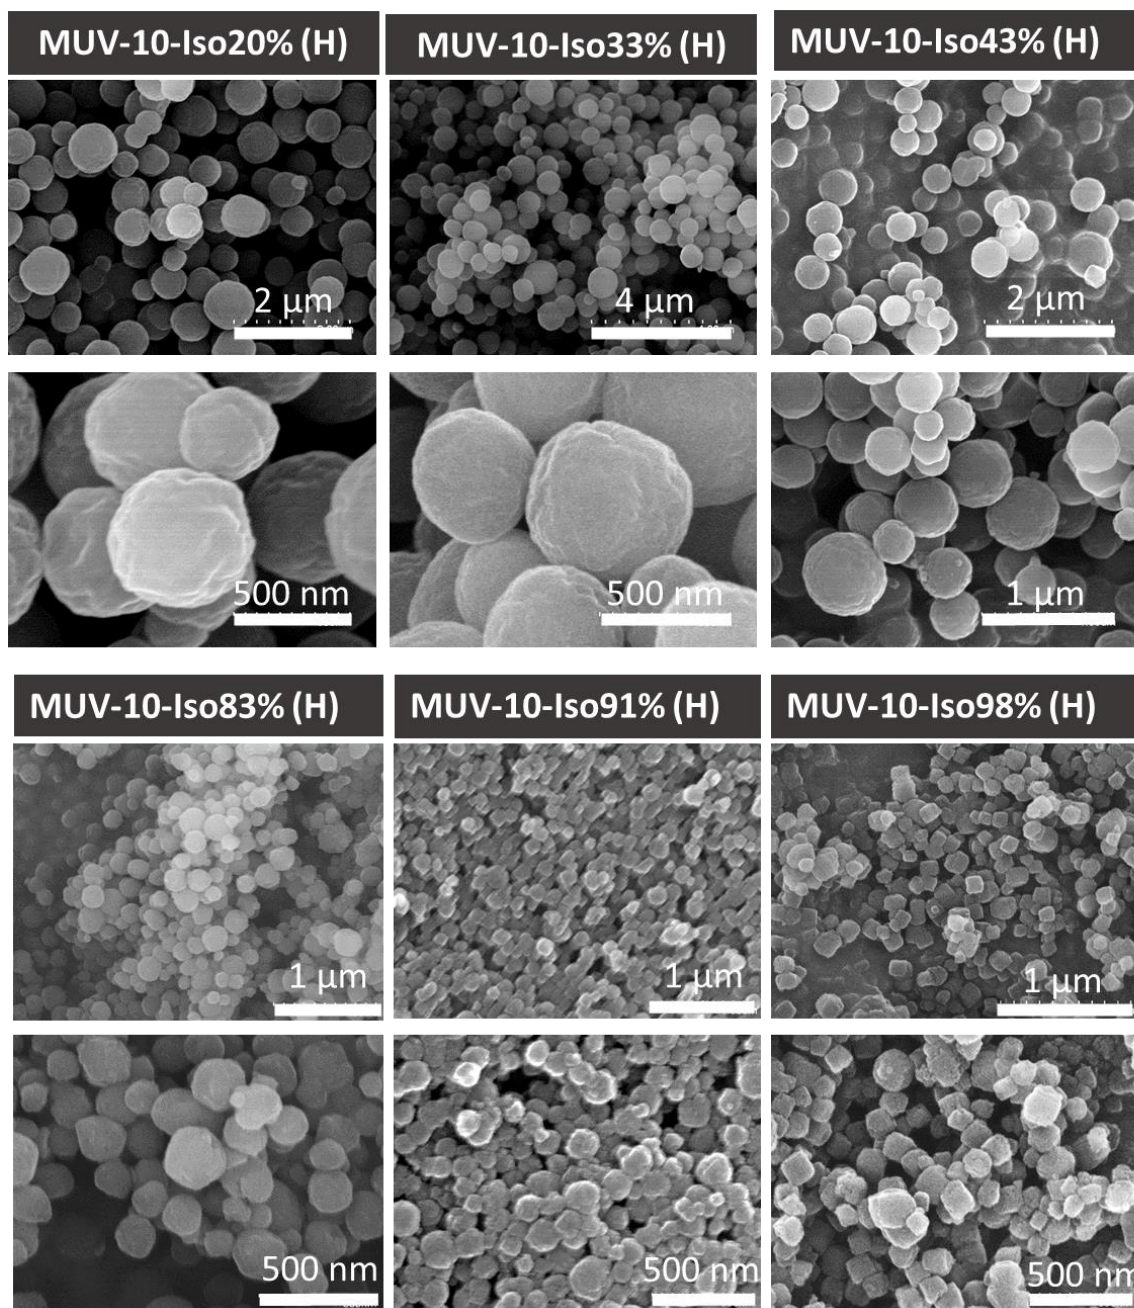

**Figure S22:** SEM images of iso%-H phases showing changes in morphology and particle size with increasing concentration of modulator.



**Table S36:** Tabulated particle sizes and standard deviations of iso%-H.

| Sample   | Particle size ( $\mu\text{m}$ ) | Standard deviation ( $\mu\text{m}$ ) |
|----------|---------------------------------|--------------------------------------|
| MUV-10 H | 3.064                           | 1.300                                |
| iso20%-H | 0.641                           | 0.171                                |
| iso33%-H | 0.612                           | 0.154                                |
| iso43%-H | 0.532                           | 0.096                                |
| iso83%-H | 0.234                           | 0.051                                |
| iso91%-H | 0.114                           | 0.024                                |
| iso98%-H | 0.144                           | 0.029                                |

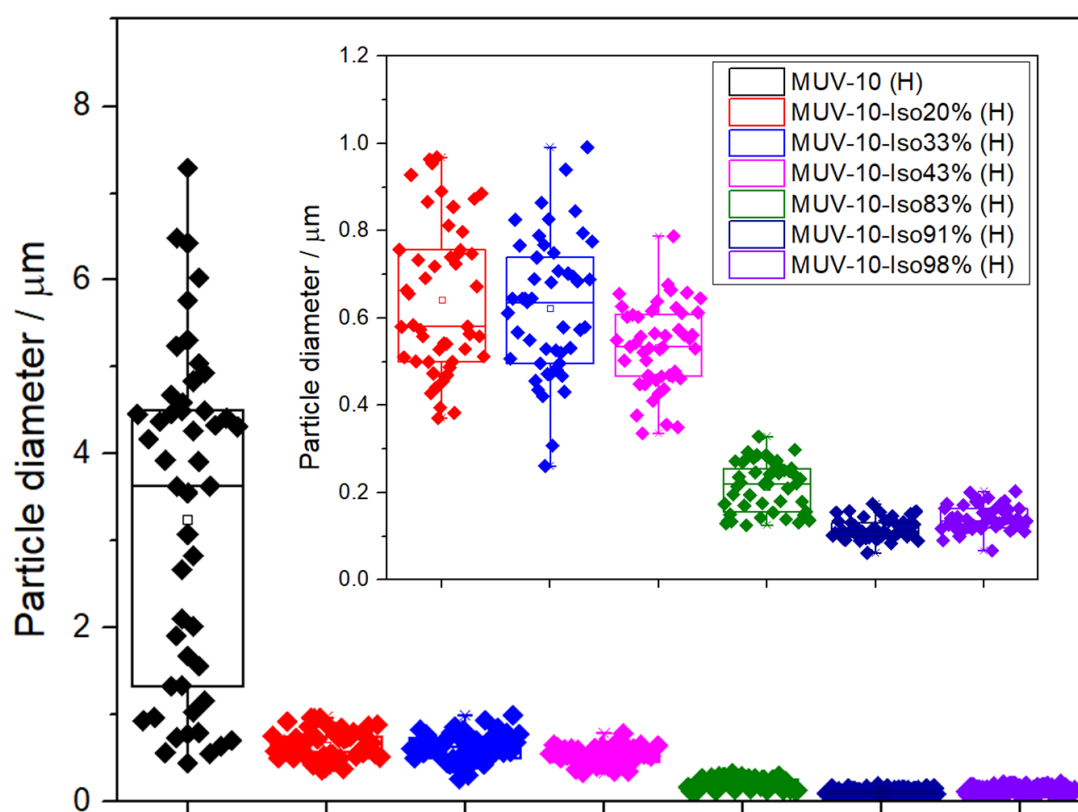

**Figure S23:** Box chart statistical representation of iso%-H particle sizes. Bin size of 50 nm, particle count of 50. Average size and standard deviation, 25% and 75% quartiles.

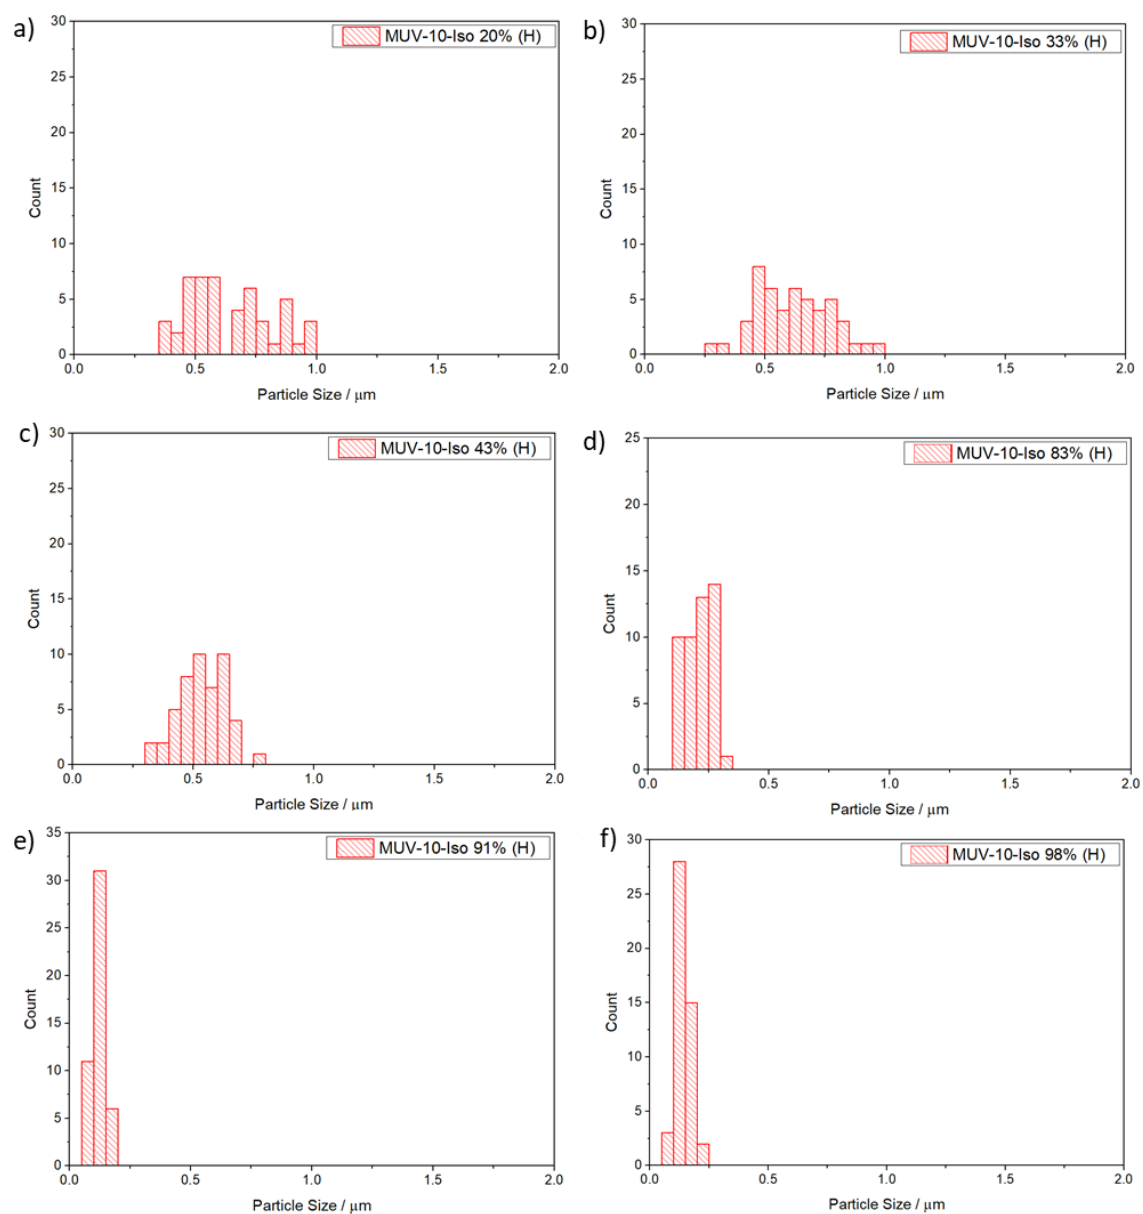

**Figure S24:** Individual particle size histograms of iso%-H. Bin size of 50 nm and particle count of 50.

### S.8.1. Morphology and particle size of benzo%-H series.

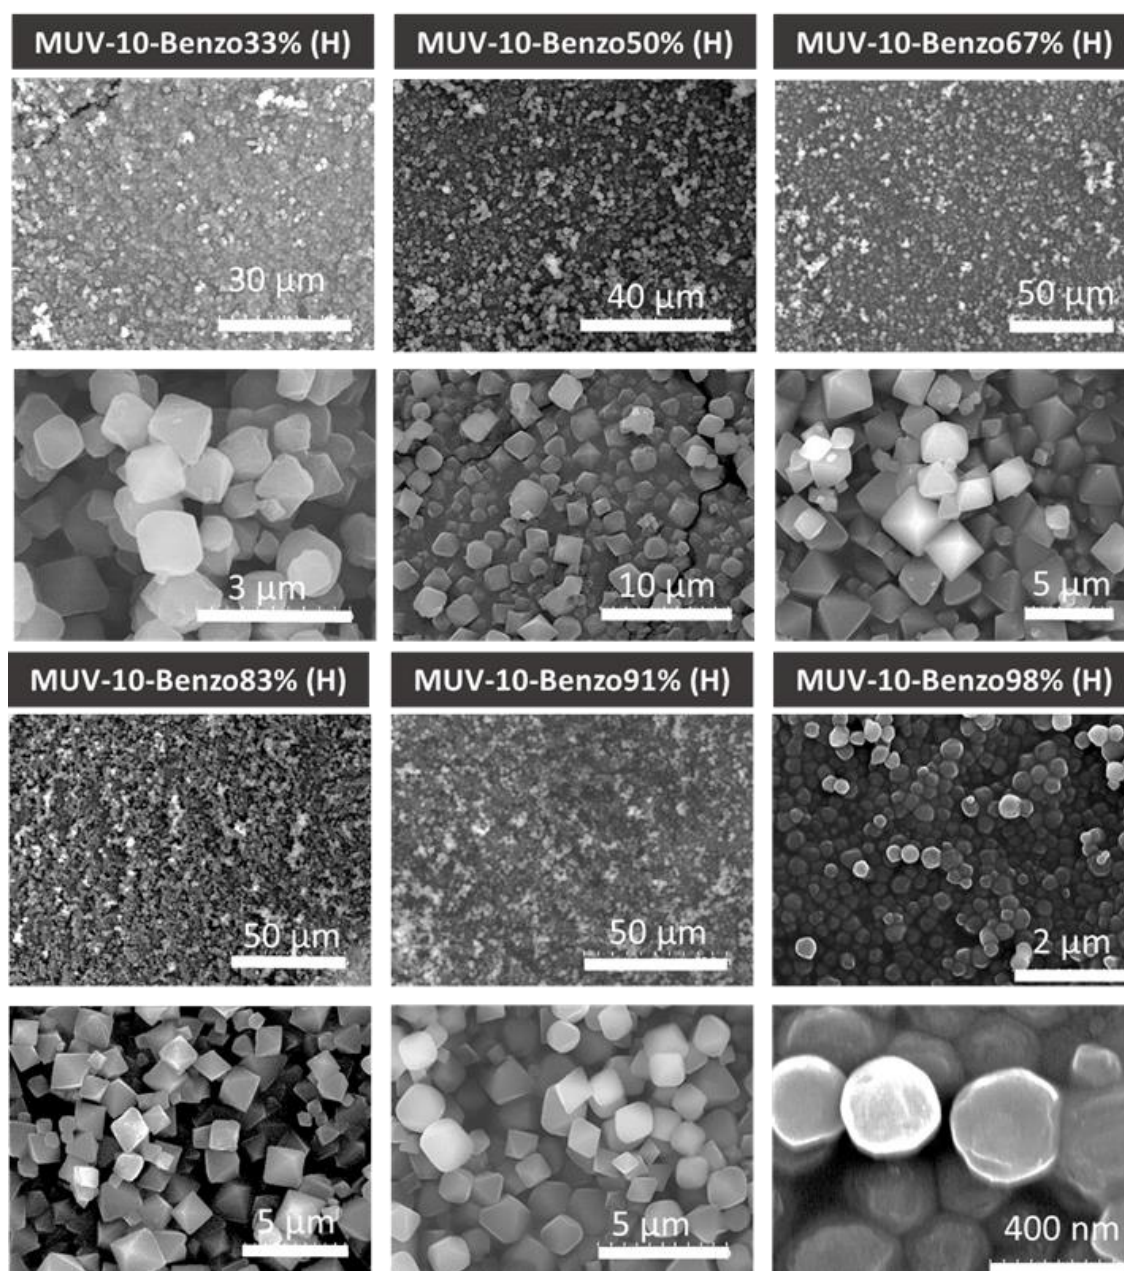

**Figure S25:** SEM images of benzo%-H, showing changes in morphology with more rounded corners compared to pristine MUV-10 possibly as a consequence of partial incorporation on the surface, with benzo98% H presenting a similar morphology to iso98% H.

**Table S37:** Tabulated particle sizes and standard deviations of benzo%-H.

| Sample     | Particle size ( $\mu\text{m}$ ) | Standard deviation ( $\mu\text{m}$ ) |
|------------|---------------------------------|--------------------------------------|
| MUV-10 H   | 3.064                           | 1.300                                |
| benzo33%-H | 1.357                           | 0.237                                |
| benzo50%-H | 2.820                           | 0.356                                |
| benzo67%-H | 3.690                           | 0.358                                |
| benzo83%-H | 2.329                           | 0.316                                |
| benzo91%-H | 2.475                           | 0.445                                |
| benzo98%-H | 0.288                           | 0.039                                |

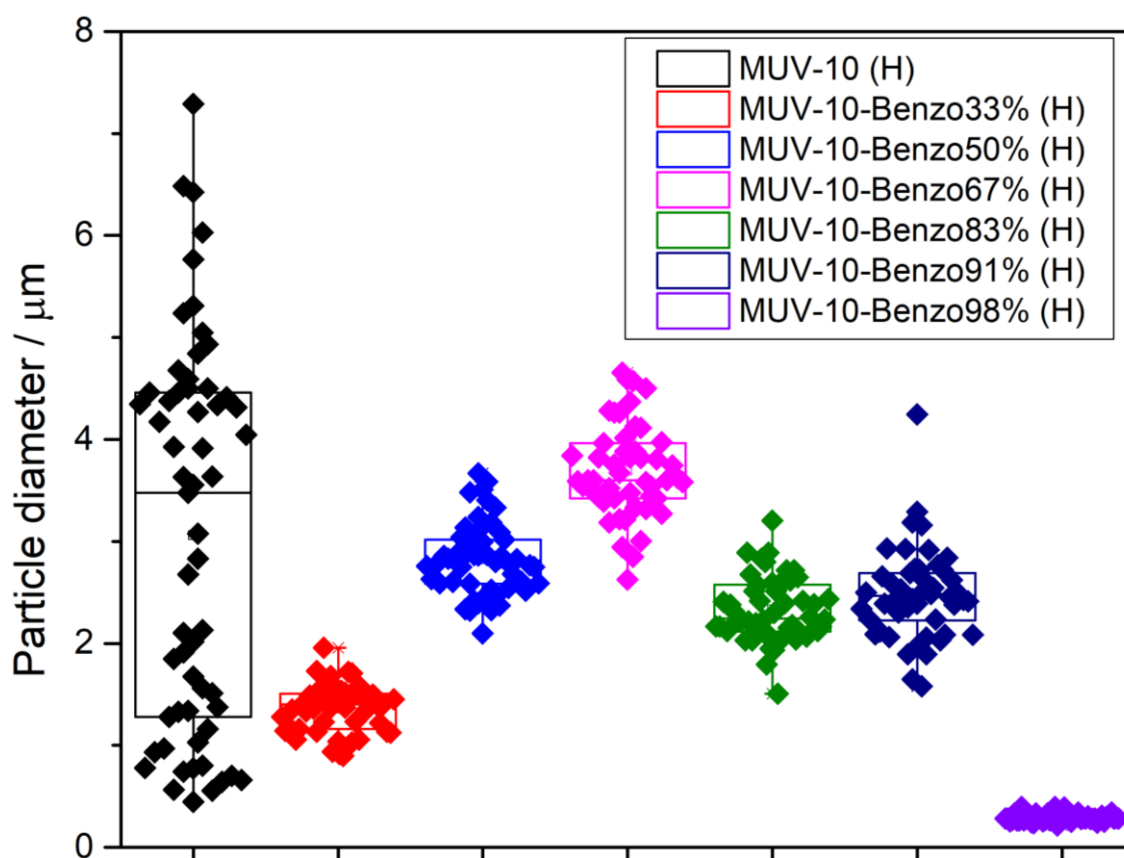

**Figure S26:** Box chart representation of benzo%-H particle sizes. Bin size of 50 nm. Bin size of 50 nm, particle count of 50. Average size and standard deviation, 25% and 75% quartiles.

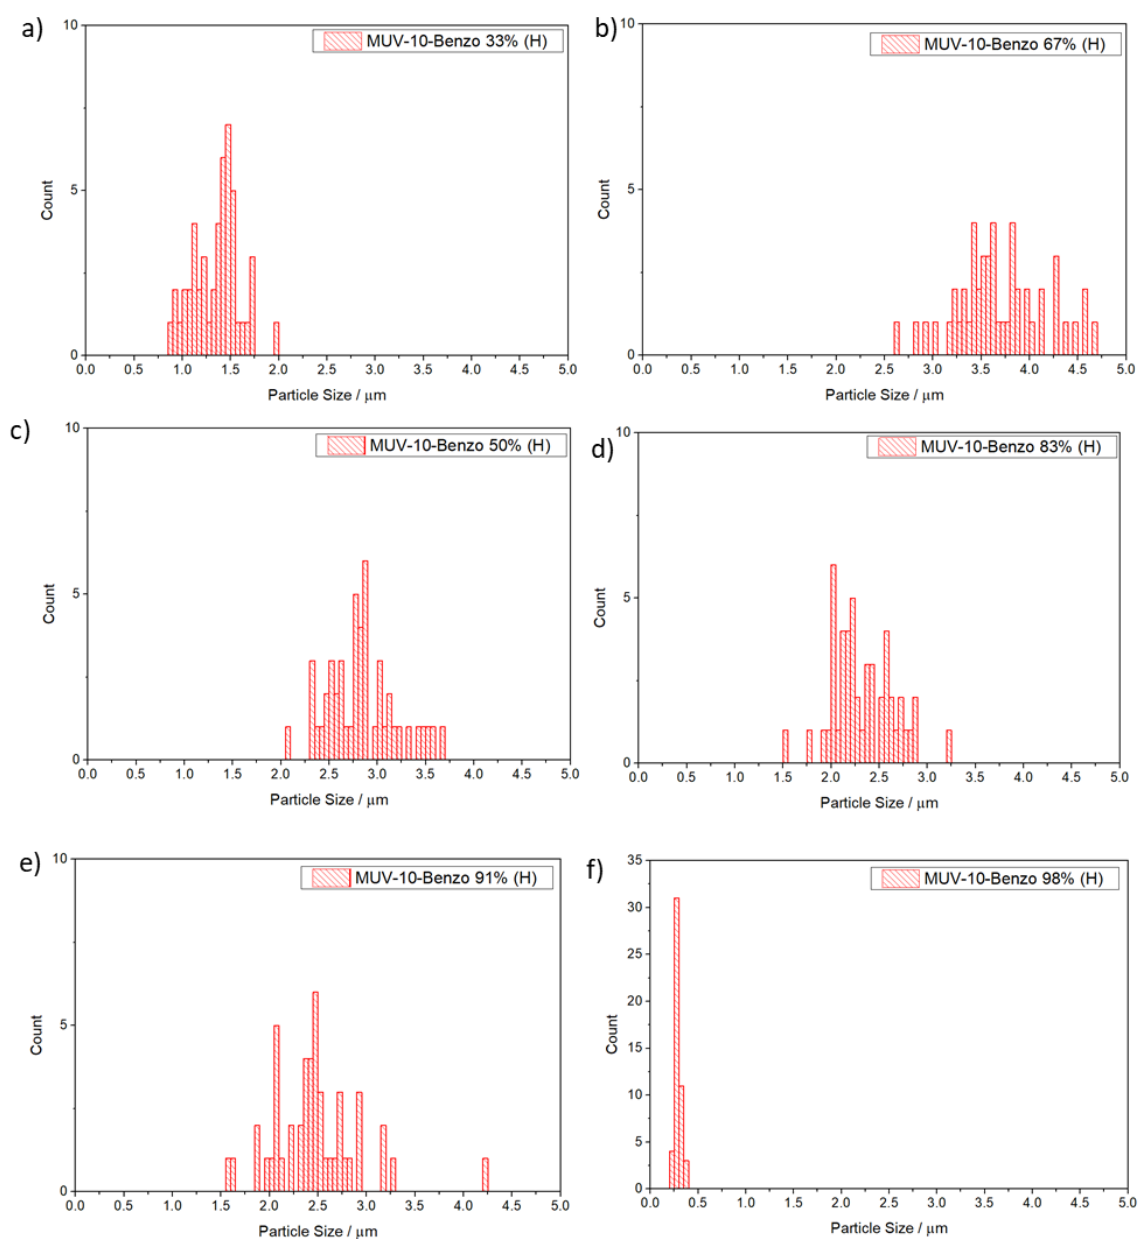

**Figure S27:** Individual particle size histograms of benzo%-H samples. Bin size of 50 nm. Bin size of 50 nm and particle count of 50.

### S.8.2. Water stability of iso% and benzo%-H series for most defective samples.

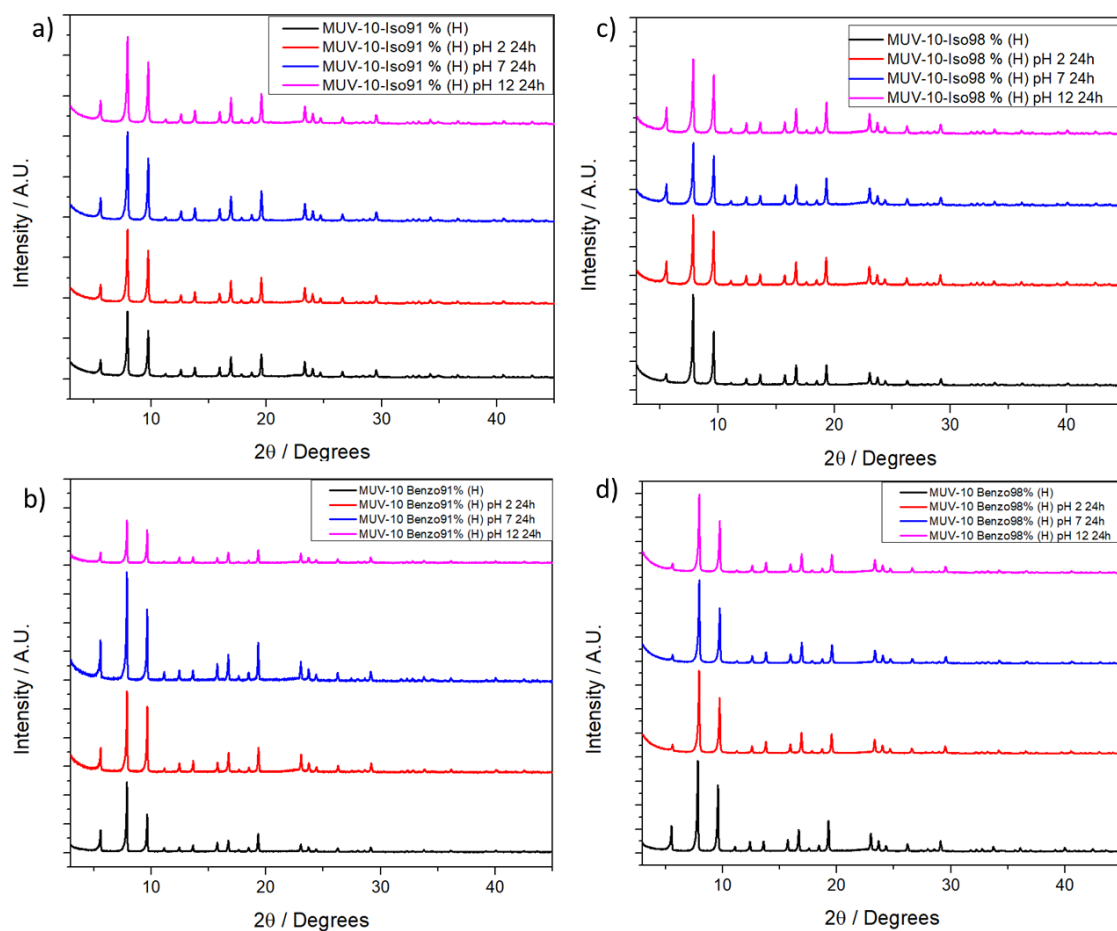

**Figure S28:** PXRD of the most defective iso H and benzo H samples after dispersion in water at different pH for 24 hours, showing stability.

### S.8.3. Effect of defectivity in the dispersability of the samples in water and dichloromethane.

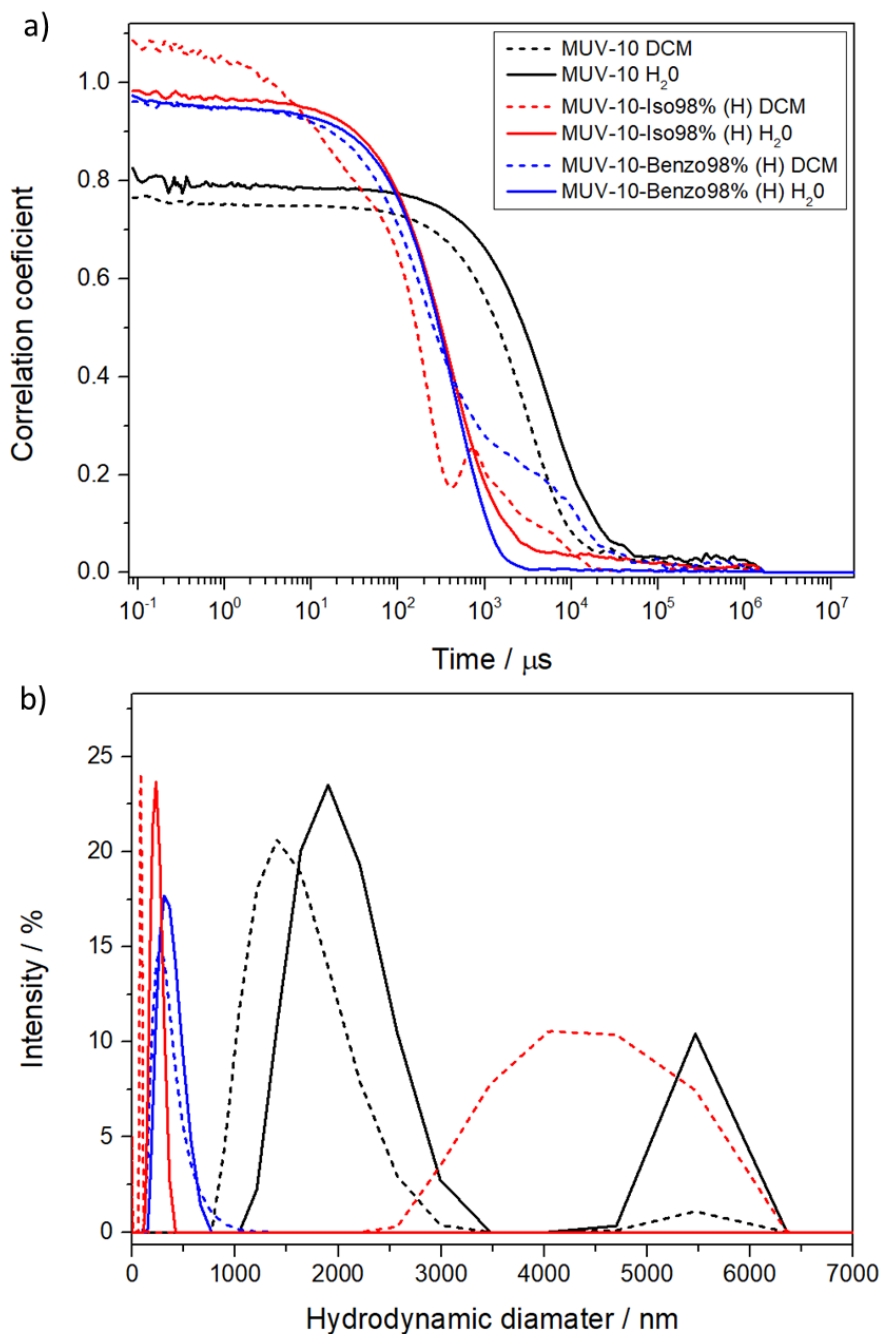

**Figure S29:** Comparison of a) correlograms of dispersions in water and DCM and b) hydrodynamic diameters obtained from the correlograms. The correlograms show that pristine MUV-10 disperses well in both DCM and water, indicating slightly higher particle sizes and sedimentation upon water dispersion. In contrast, both iso and benzo samples disperse well in water, while they do not in DCM. In fact, the correlograms in water indicate narrow size distribution of small size, while in DCM the appearance of aggregates is evident, some of which due to their high size are not present in the hydrodynamic diameter distribution of benzo98%-H. This indicates that defectivity increases the hydrophilicity of the samples.

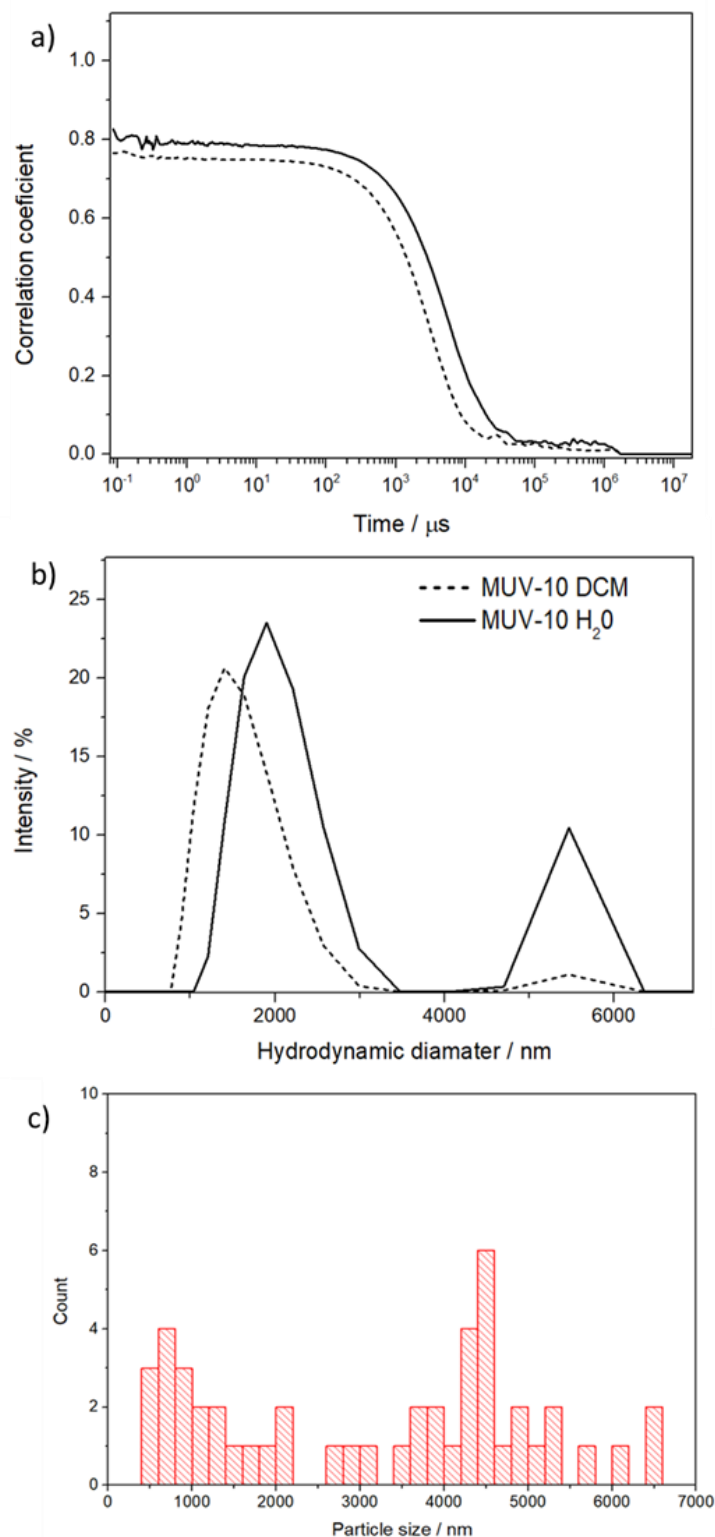

**Figure S30:** a) correlograms of dispersions in water and DCM b) hydrodynamic diameters obtained from the correlograms of MUV-10 dispersions in water and DCM and c) particle size distributions determined by SEM. Pristine MUV-10 displays particle sizes like those determined by SEM, with slightly better dispersity in DCM than in water. Additionally, the correlograms indicate that there is sedimentation in the water dispersion. This indicates that pristine MUV-10 is slightly more hydrophobic than hydrophilic.



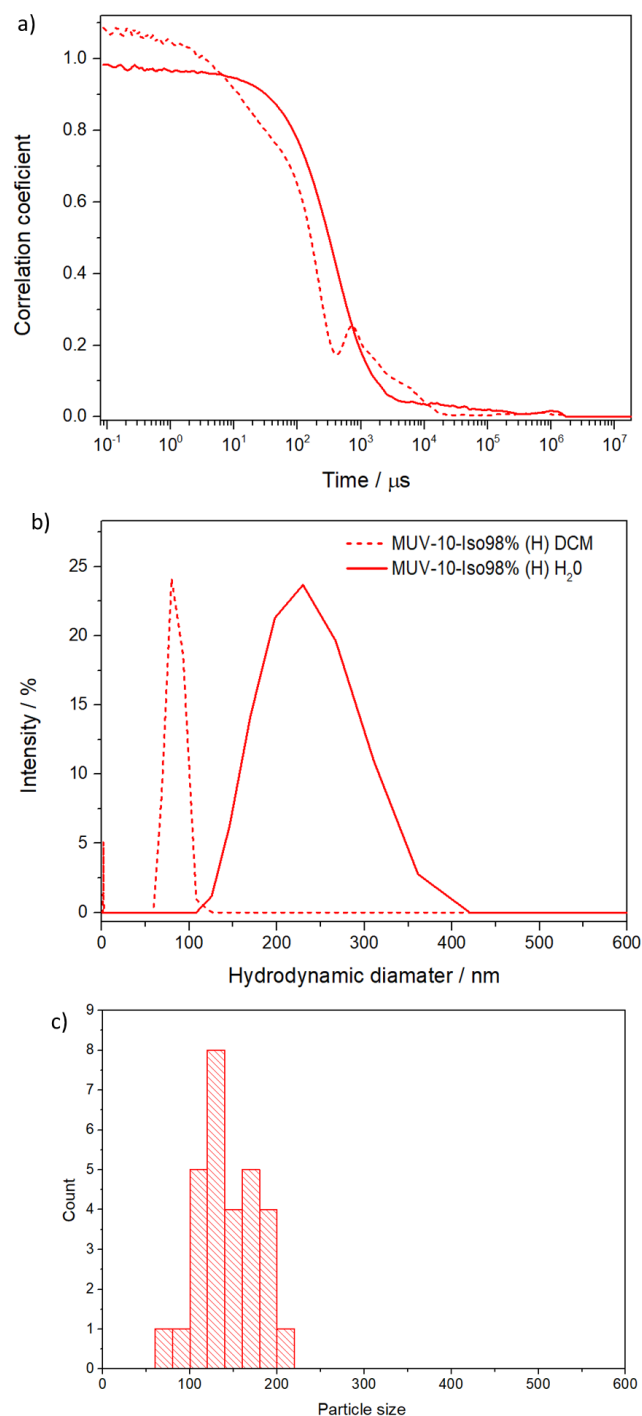

**Figure S31:** a) correlograms of dispersions in water and DCM, b) hydrodynamic diameters obtained from the correlograms of iso98%-H dispersions in water and DCM and c) particle size distributions determined by SEM. iso98%-H displays water hydrodynamic diameters similar to the particle sizes determined by SEM, with correlograms showing narrow distributions and no mayor aggregates or sediments. In contrast, DMC correlograms show the presence of different populations due to poor dispersion, with two populations, one smaller than in water and one being fundamentally aggregates that result in ca. 4.5  $\mu\text{m}$  in size. This indicates that iso98% H is highly hydrophilic.

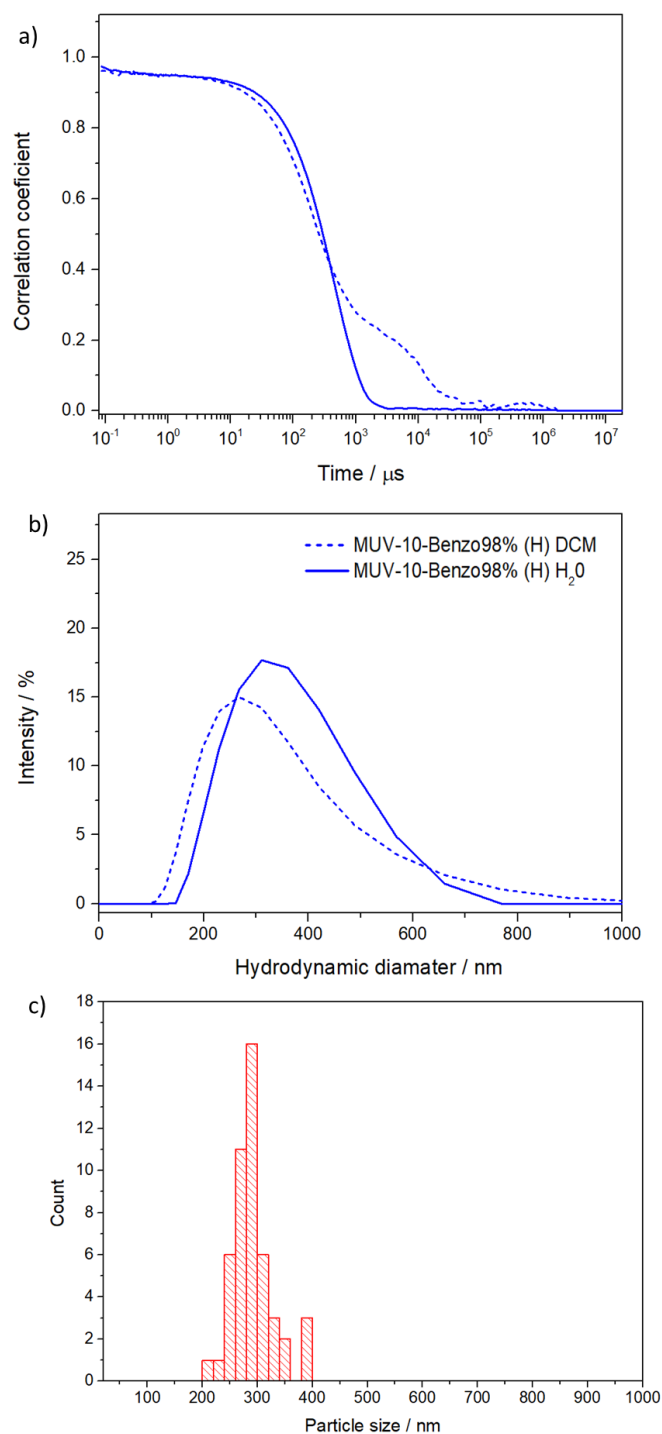

**Figure S32:** a) correlograms of dispersions in water and DCM, b) hydrodynamic diameters obtained from the correlograms of benzo98%-H dispersions in water and DCM and c) particle size distributions determined by SEM. benzo98%-H displays water hydrodynamic diameters similar to the particle sizes determined by SEM, with correlograms showing narrow distributions and no mayor aggregates or sediments. In contrast, DMC correlograms show the presence of bigger populations due to poor dispersion. benzo hydrodynamic diameter in DCM is similar to water, likely due to aggregates being too big to be displayed in the hydrodynamic diameter distributions determined by DLS, which is also envisioned in the correlograms, showing a bigger population for benzo than for iso. This indicates that iso98%-H is highly hydrophilic.

#### S.8.4. Analysis of the porosity of iso% and benzo%-H series

**Table S38:** Tabulated porosimetry extracted from N<sub>2</sub> adsorption and desorption measurements of iso%-H samples.

| Sample   | S <sub>BET</sub> / S <sub>MICRO</sub><br>(m <sup>2</sup> /g) | Micro / Meso pores volume<br>(cm <sup>3</sup> /g) |       | Total Pore volume<br>(cm <sup>3</sup> /g) |
|----------|--------------------------------------------------------------|---------------------------------------------------|-------|-------------------------------------------|
| MUV-10 H | 1041 / 975                                                   | 0.365                                             | 0.008 | 0.373                                     |
| iso20%-H | 952 / 834                                                    | 0.322                                             | 0.136 | 0.474                                     |
| iso33%-H | 881 / 787                                                    | 0.308                                             | 0.151 | 0.461                                     |
| iso43%-H | 903 / 807                                                    | 0.317                                             | 0.174 | 0.493                                     |
| iso83%-H | 1216 / 979                                                   | 0.389                                             | 0.203 | 0.592                                     |
| iso91%-H | 1247 / 993                                                   | 0.414                                             | 0.202 | 0.616                                     |
| iso98%-H | 1041 / 839                                                   | 0.333                                             | 0.279 | 0.612                                     |

**Table S39:** Tabulated porosimetry extracted from N<sub>2</sub> adsorption and desorption measurements of benzo%-H samples.

| Sample     | S <sub>BET</sub> / S <sub>MICRO</sub><br>(m <sup>2</sup> /g) | Micro / Meso pores volume<br>(cm <sup>3</sup> /g) |        | Total Pore volume<br>(cm <sup>3</sup> /g) |
|------------|--------------------------------------------------------------|---------------------------------------------------|--------|-------------------------------------------|
| MUV-10 H   | 1041 / 975                                                   | 0.365                                             | 0.0190 | 0.373                                     |
| benzo33%-H | 993 / 870                                                    | 0.335                                             | 0.037  | 0.373                                     |
| benzo50%-H | 923 / 775                                                    | 0.297                                             | 0.128  | 0.425                                     |
| benzo67%-H | 1004/933                                                     | 0.361                                             | 0.055  | 0.416                                     |
| benzo83%-H | 996 / 872                                                    | 0.338                                             | 0.094  | 0.432                                     |
| benzo91%-H | 823/ 634                                                     | 0.240                                             | 0.246  | 0.486                                     |
| benzo98%-H | 986 / 827                                                    | 0.322                                             | 0.132  | 0.453                                     |

To simulate the PSD distribution of iso-H 33% (8% missing linkers) and 98% (44% missing linkers) we substituted 4 and 32 random btc ligands from a MUV-10 (2 x 2 x 2) cell by iso and formate ligands. This procedure was repeated until 12 symmetry independent defective structures were obtained. The pore size for each configuration was simulated by using Zeo++ (chan\_radians=probe\_radians=0.8 and num\_samples=2000).<sup>[6]</sup> Finally, individual PSD were averaged and compared to experimental PSD as represented in **Figure S28**.

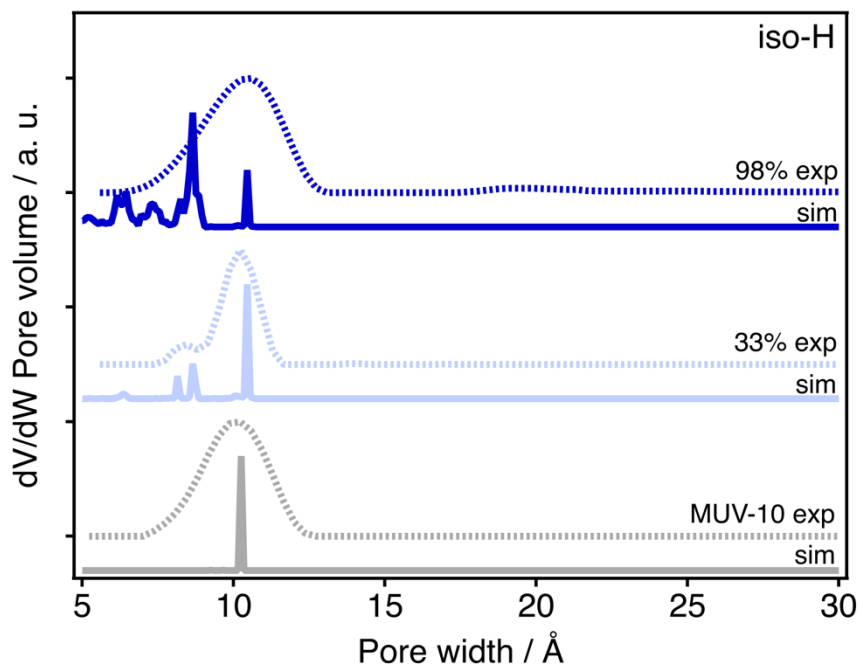

**Figure S33:** Experimental and simulated pore size distribution for iso-H 98%, 33% MUV-10. Simulated data have been shifted by -1.2 Å.

## S.9. Effect of modulation in the properties of MUV-10 L defective phases

### S.9.1. Morphology and particle size of iso and benzo%-L series.

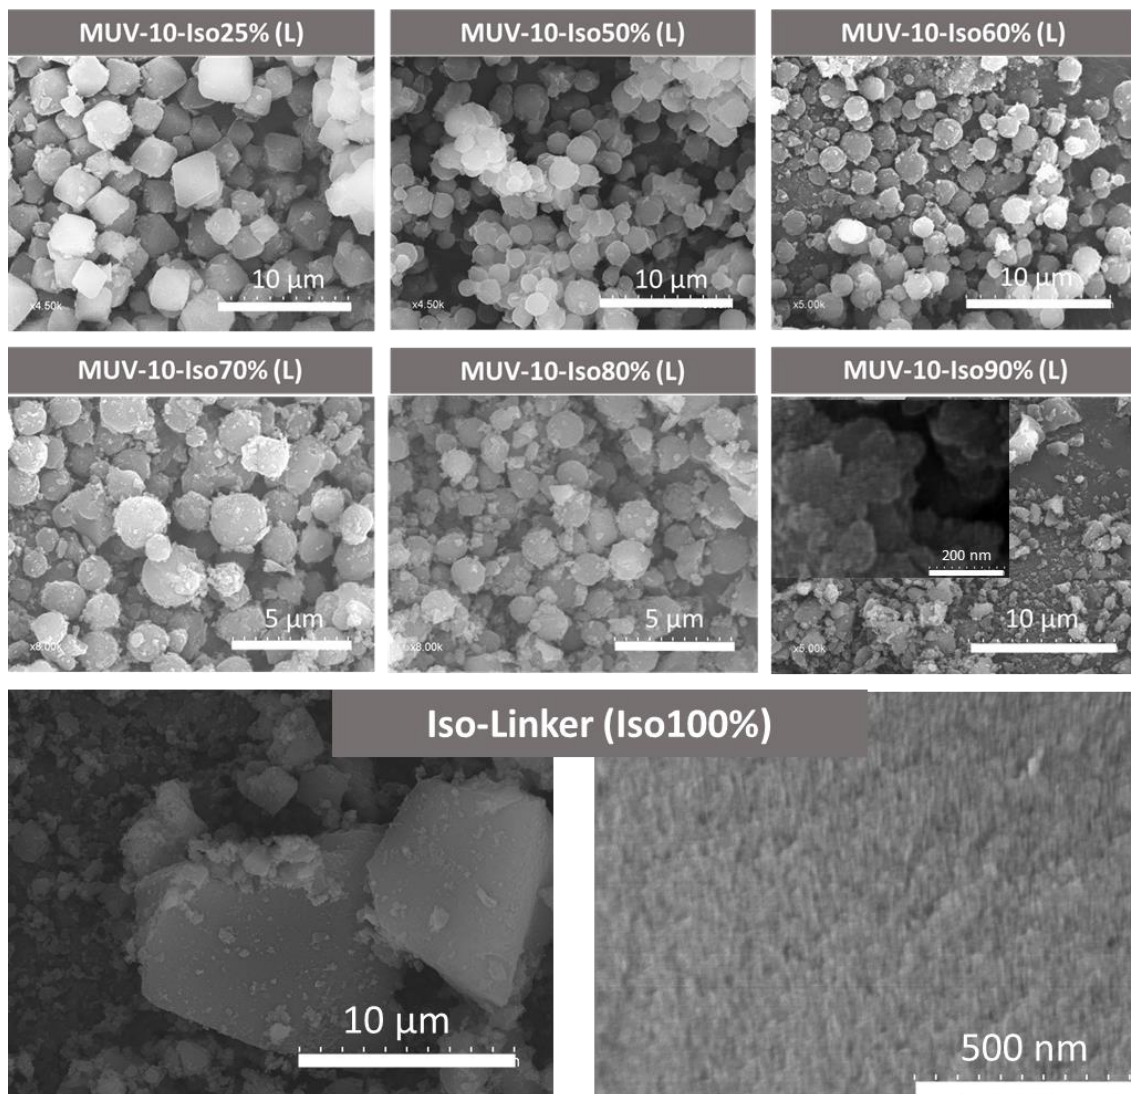

**Figure S34:** SEM images of iso%-L samples, showing a change in morphology compared to the pristine MOF, alongside with sample amorphization, possibly consequence of the formation of the iso 100% phase, which is composed of tiny nanoparticles.

**Table S40:** Tabulated particle sizes and standard deviations of iso%-L samples.

| Sample   | Particle size ( $\mu\text{m}$ ) | Standard deviation ( $\mu\text{m}$ ) |
|----------|---------------------------------|--------------------------------------|
| MUV-10 L | 6.0                             | 1.3                                  |
| iso25%-L | 3.153                           | 0.565                                |
| iso50%-L | 1.593                           | 0.334                                |
| iso60%-L | 1.388                           | 0.311                                |
| iso70%-L | 1.488                           | 0.316                                |
| iso80%-L | 1.413                           | 0.314                                |
| iso90%-L | n/a                             | n/a                                  |

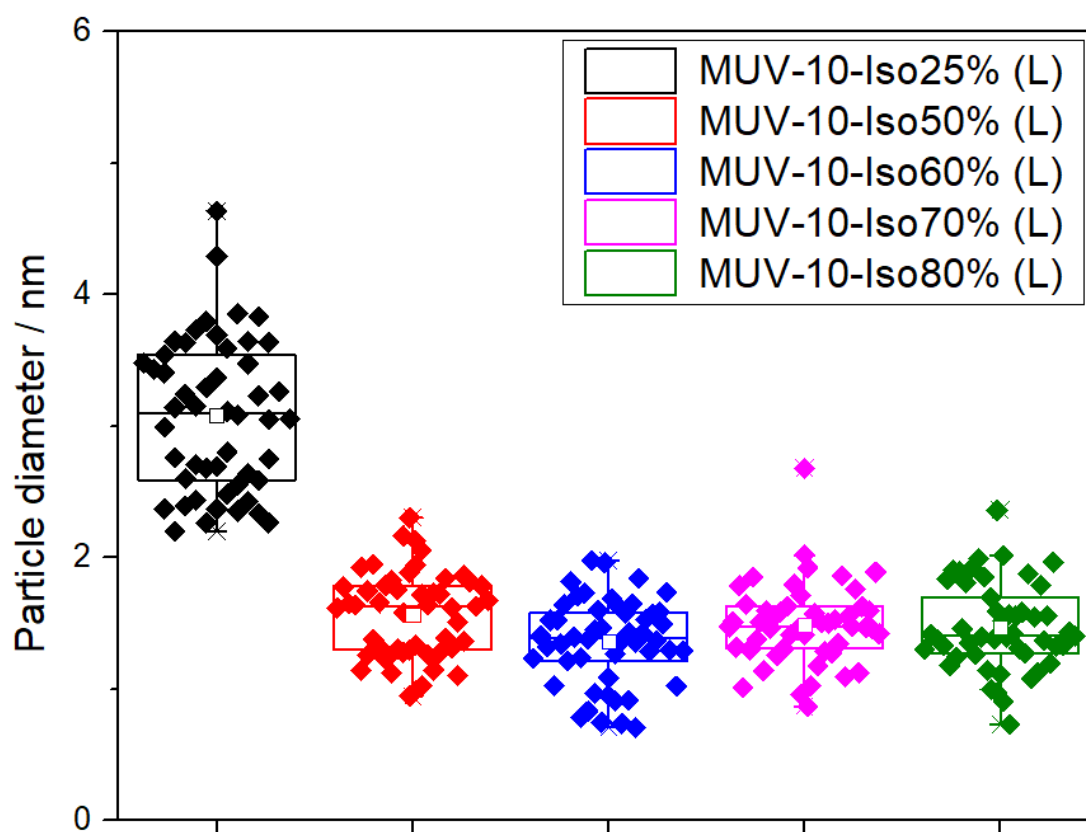

**Figure S35:** Box chart representation of iso%-L particle sizes. Bin size of 50 nm, particle count of 50. Average size and standard deviation, 25% and 75% quartiles.

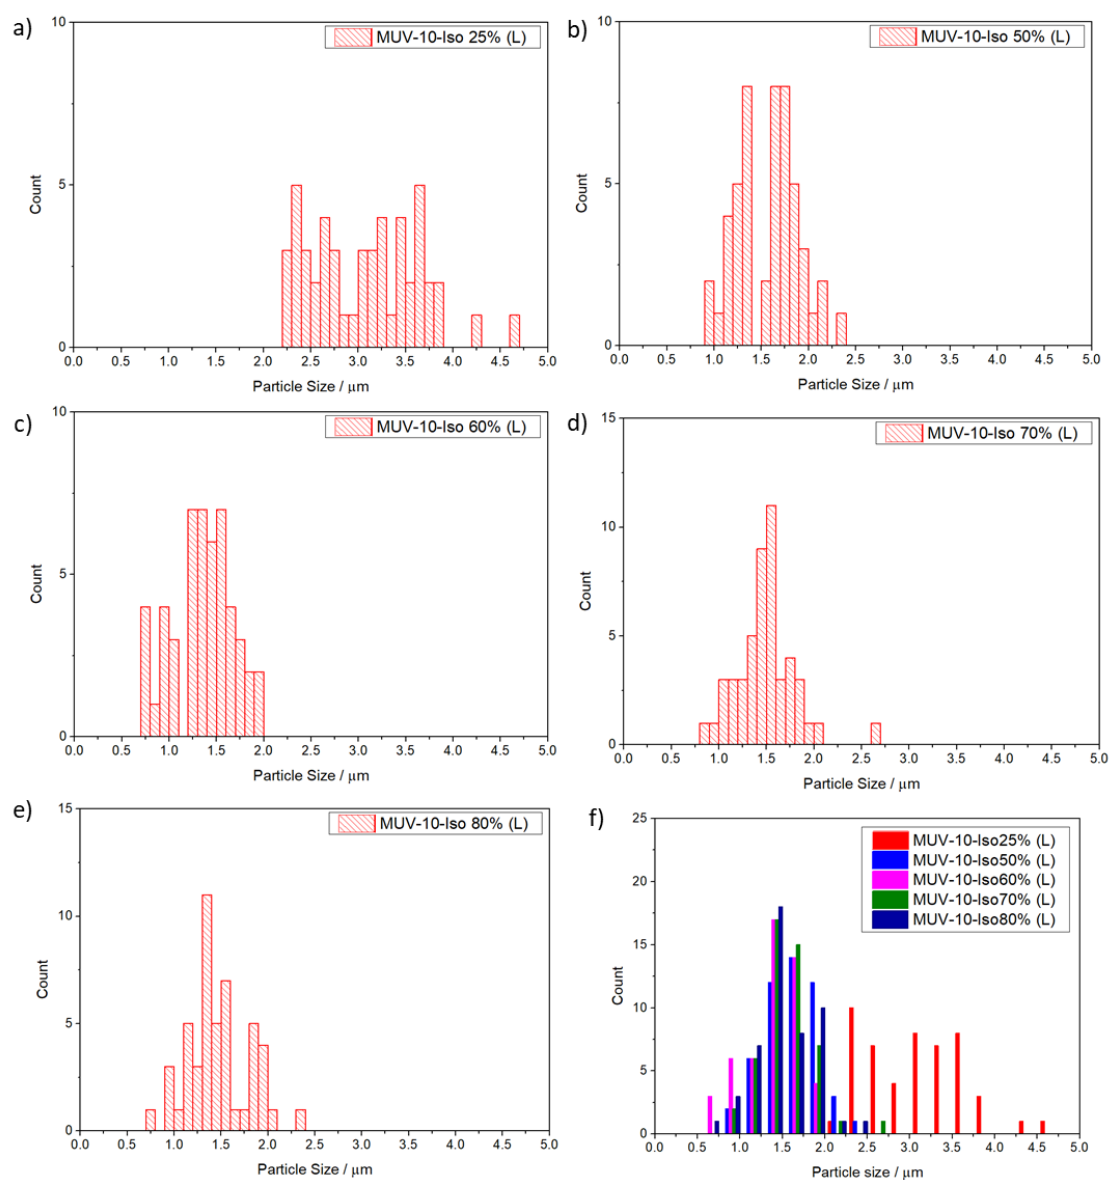

**Figure S36:** Particle size histograms of iso%-L. Bin size of 50 nm for individual profiles and 250 nm for comparison.



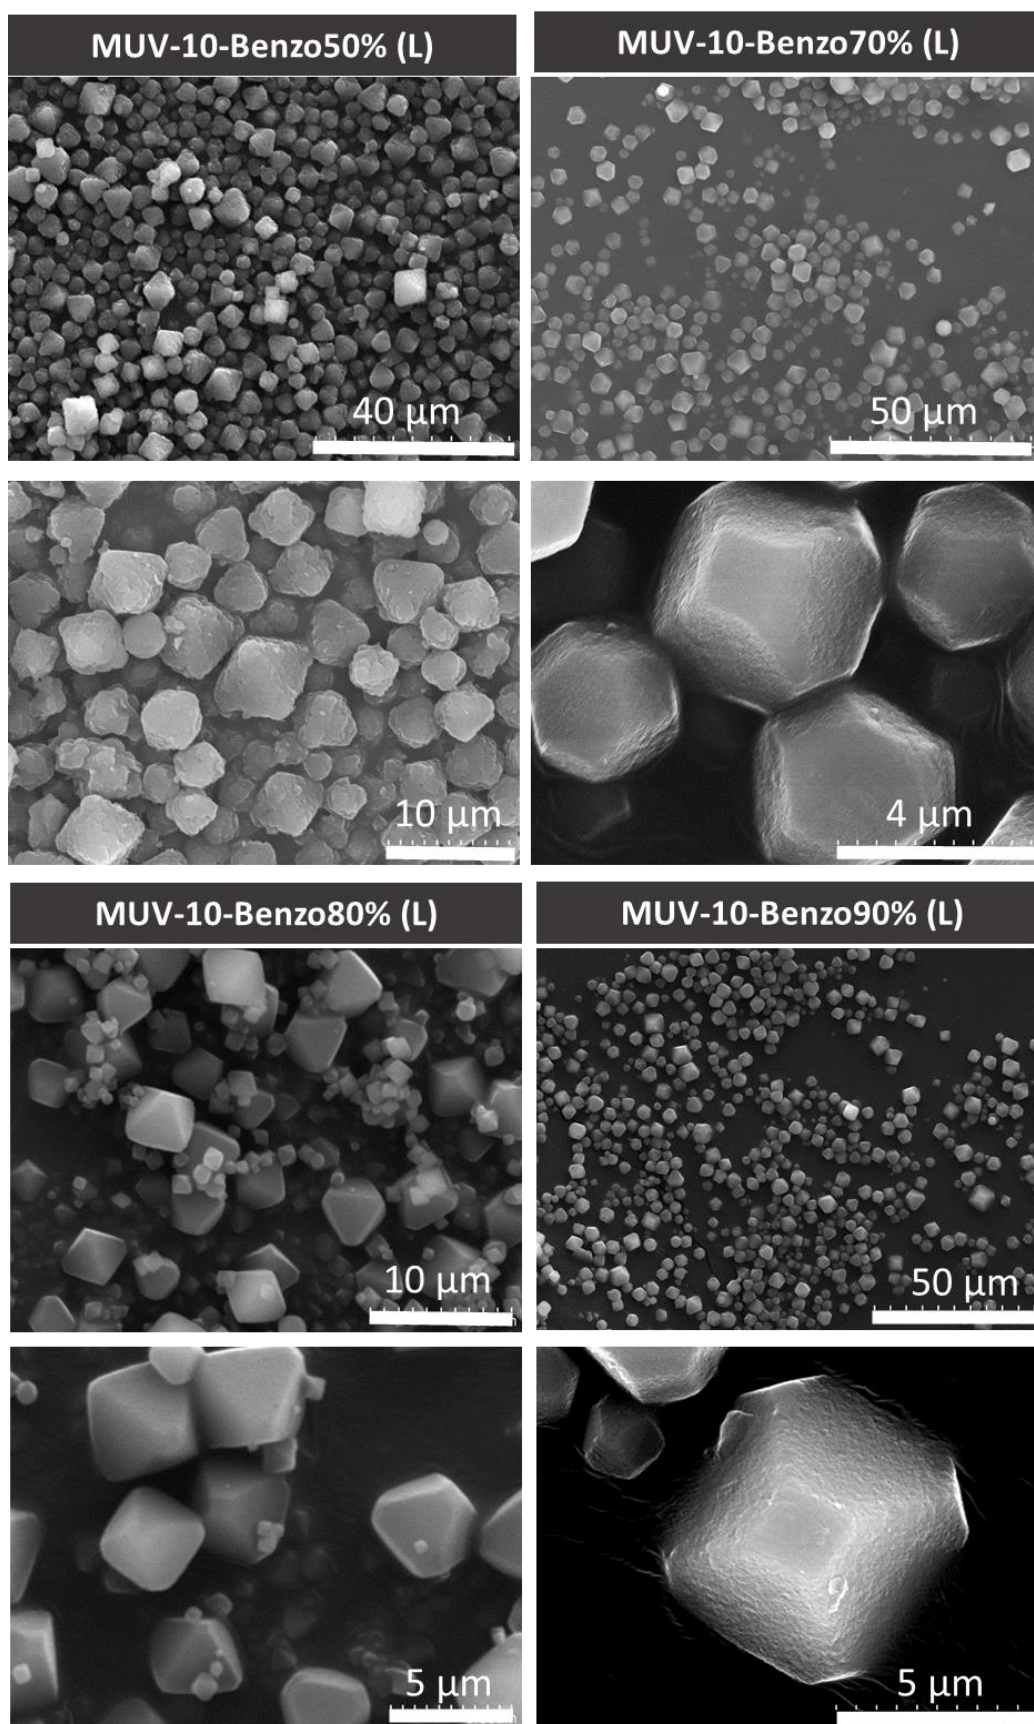

**Figure S37:** SEM images of benzo%-L modulated with benzoic acid, showing changes in morphology with more rounded corners compared to pristine MUV-10 possibly as a consequence of preferential surface incorporation.



**Table S41:** Tabulated Particle sizes and standard deviation of iso%-L samples

| Sample     | Particle size ( $\mu\text{m}$ ) | Standard deviation ( $\mu\text{m}$ ) |
|------------|---------------------------------|--------------------------------------|
| MUV-10 L   | 6.0                             | 1.3                                  |
| benzo50%-L | 7.134                           | 1.381                                |
| benzo70%-L | 5.075                           | 1.165                                |
| benzo80%-L | 4.476                           | 1.388                                |
| benzo90%-L | 3.847                           | 1.199                                |

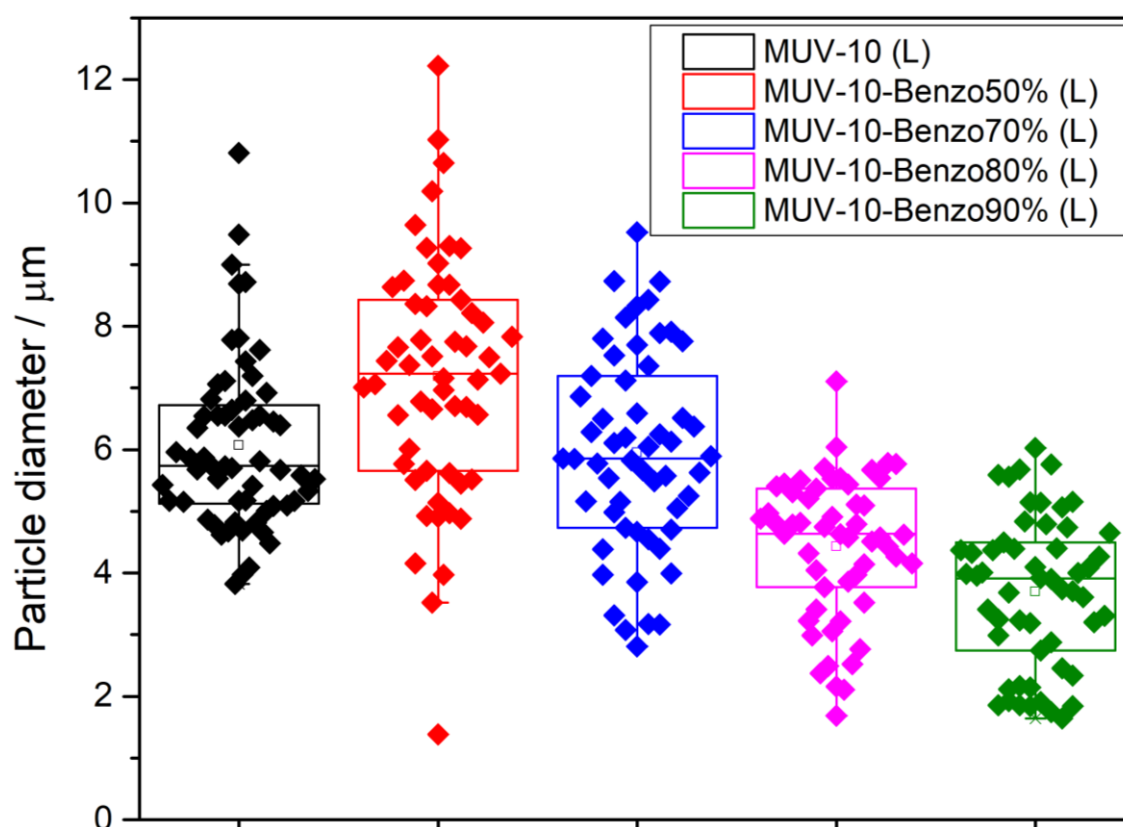

**Figure S38:** Box chart representation of benzo%-L particle sizes. Bin size of 200 nm, particle count of 50. Average size and standard deviation, 25% and 75% quartiles.

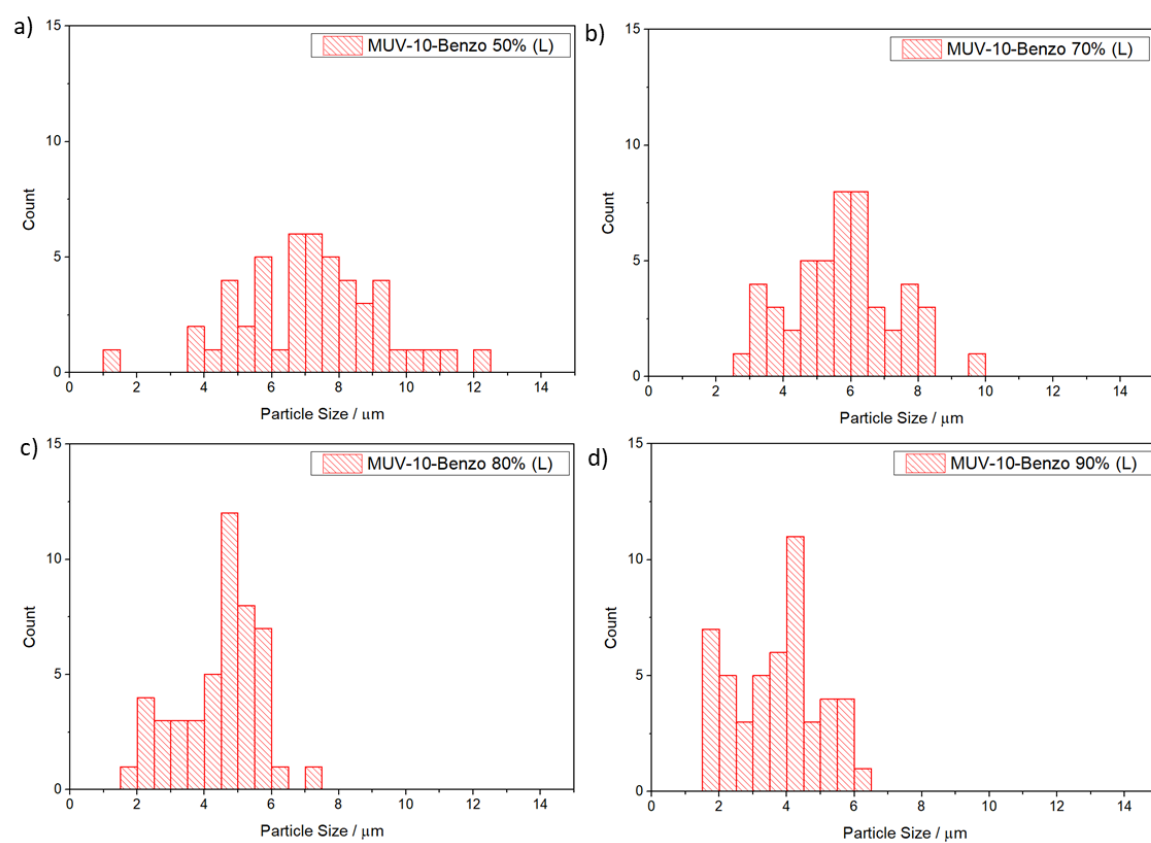

**Figure S39:** Particle size histograms of benzo%-L. Bin size of 500 nm.

### S.9.2. Water stability of iso% and benzo%-L series

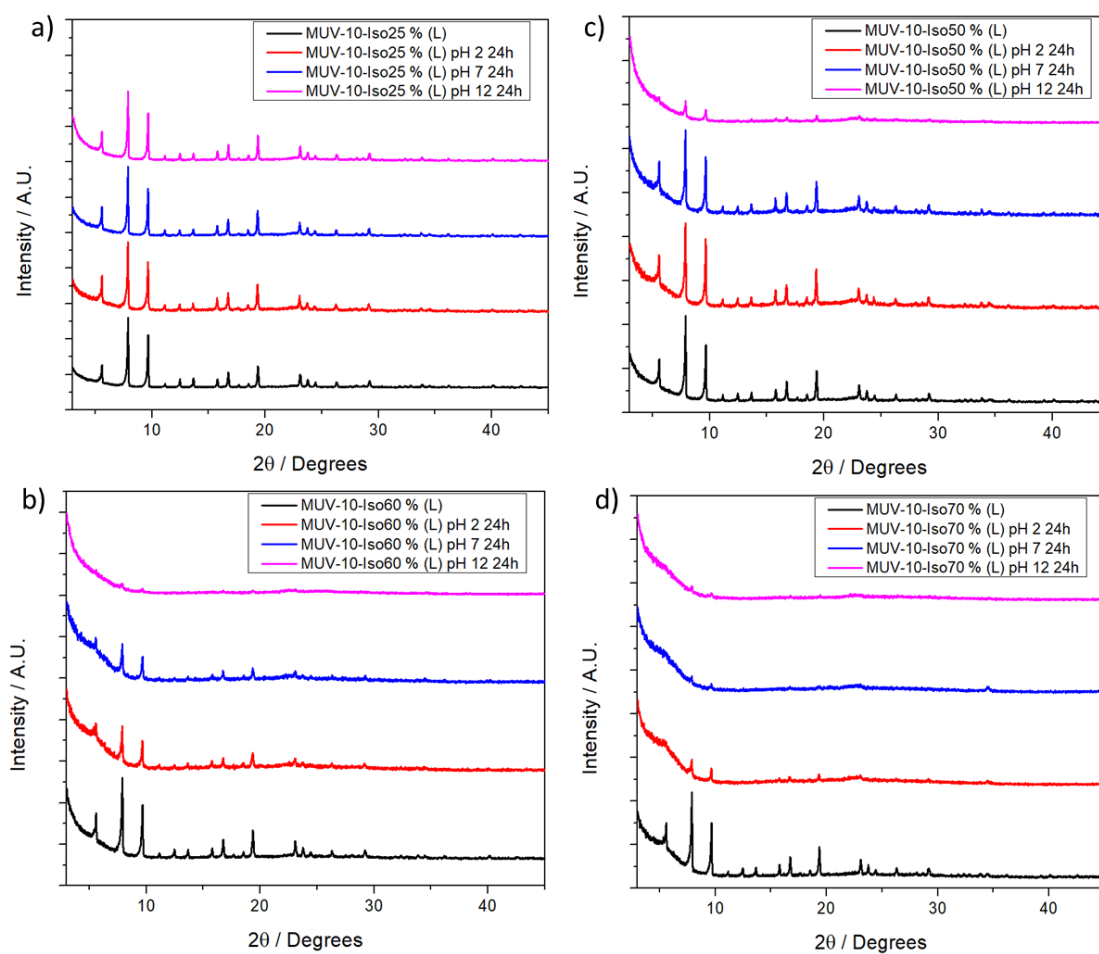

**Figure S40:** PXRD of iso%-L samples after dispersion in water at different pH for 24 hours.

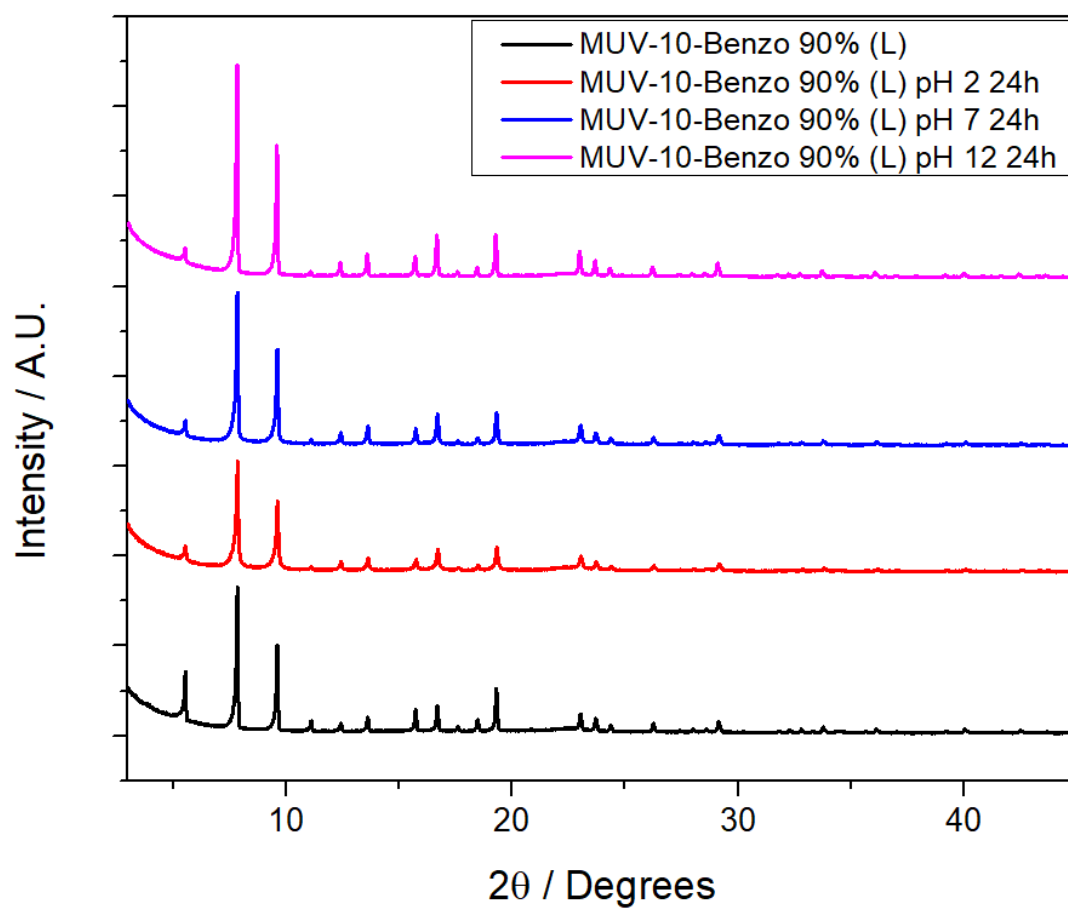

**Figure S41:** PXRD of the most defective benzo%-L sample after dispersion in water at different pH for 24 hours, showing stability.

### S.9.3. Analysis of the porosity of iso% and benzo%-L series

**Table S42:** Tabulated porosimetry extracted from N<sub>2</sub> adsorption and desorption measurements of iso%-L samples, iso 100% phase and a physical mixture of MUV-10 and iso 100% phases.

| Sample                              | $S_{\text{BET}} / S_{\text{MICRO}}$<br>(m <sup>2</sup> /g) | Micro/Meso pore volume<br>(cm <sup>3</sup> /g) |         | Total Pore volume<br>(cm <sup>3</sup> /g) |
|-------------------------------------|------------------------------------------------------------|------------------------------------------------|---------|-------------------------------------------|
| MUV-10 H                            | 1041 / 975                                                 | 0.365                                          | 0.00751 | 0.37251                                   |
| iso25%-L                            | 1064 / 846                                                 | 0.328                                          | 0.103   | 0.431                                     |
| iso50%-L                            | 1114 / 792                                                 | 0.312                                          | 0.142   | 0.454                                     |
| iso60%-L                            | 1038 / 640                                                 | 0.256                                          | 0.207   | 0.463                                     |
| iso70%-L                            | 864 / 566                                                  | 0.229                                          | 0.296   | 0.525                                     |
| iso80%-L                            | 916 / 347                                                  | 0.141                                          | 0.460   | 0.601                                     |
| iso90%-L                            | 693 / na                                                   | Na                                             | 0.590   | 0.590                                     |
| iso 100% phase                      | 430/ na                                                    | Na                                             | 0.281   | 0.281                                     |
| MUV-10, iso 100%<br>(50% in weight) | 562 / 360                                                  | 0.17089                                        | 0.1731  | 0.344011                                  |

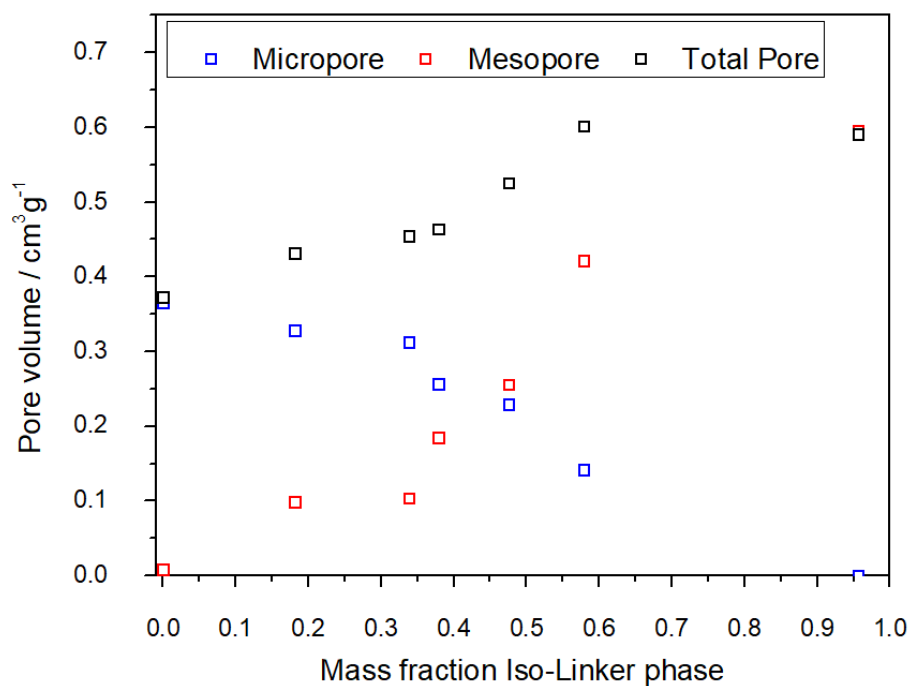

**Figure S42:** Changes in porosity metrics of iso%-L samples. The micropore, mesopore and total pore volumes are represented as a function of the mass fraction of iso 100% phase in comparison with MUV-10.

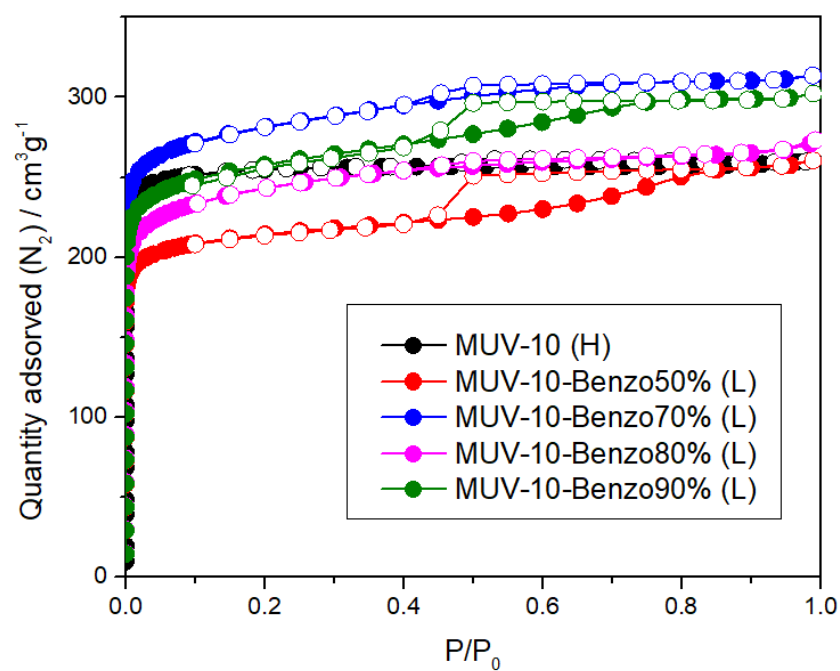

**Figure S43:**  $N_2$  adsorption and desorption isotherms of benzo%-L series.

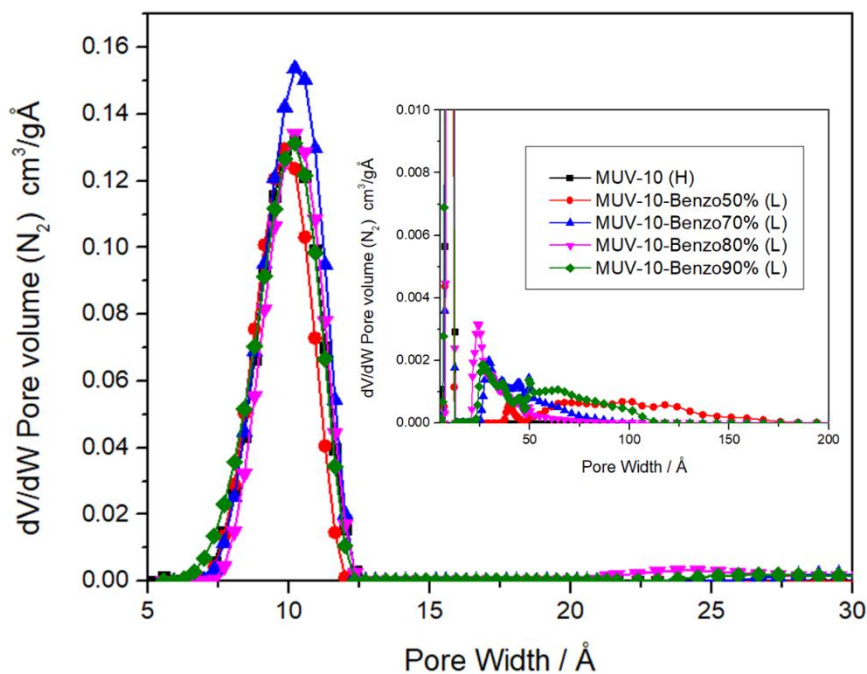

**Figure S44:** Pore size distributions of benzo%-L series by using the QSDT Cylindrical pore oxide surface model.

**Table S43:** Tabulated porosimetry extracted from N<sub>2</sub> adsorption and desorption measurements of benzo%-L samples.

| Sample     | S <sub>BET</sub> / S <sub>MICRO</sub><br>(m <sup>2</sup> /g) | Micro/Meso pore volume<br>(cm <sup>3</sup> /g) |       | Total Pore volume<br>(cm <sup>3</sup> /g) |
|------------|--------------------------------------------------------------|------------------------------------------------|-------|-------------------------------------------|
| MUV-10 L   | 934 / 815                                                    | 0.312                                          | 0.104 | 0.416                                     |
| benzo50%-L | 849 / 725                                                    | 0.278                                          | 0.119 | 0.397                                     |
| benzo70%-L | 1081 / 873                                                   | 0.345                                          | 0.136 | 0.482                                     |
| benzo80%-L | 923 / 718                                                    | 0.287                                          | 0.127 | 0.414                                     |
| benzo90%-L | 988 / 785                                                    | 0.311                                          | 0.154 | 0.465                                     |

## S.10 Comparison of thermal Stability

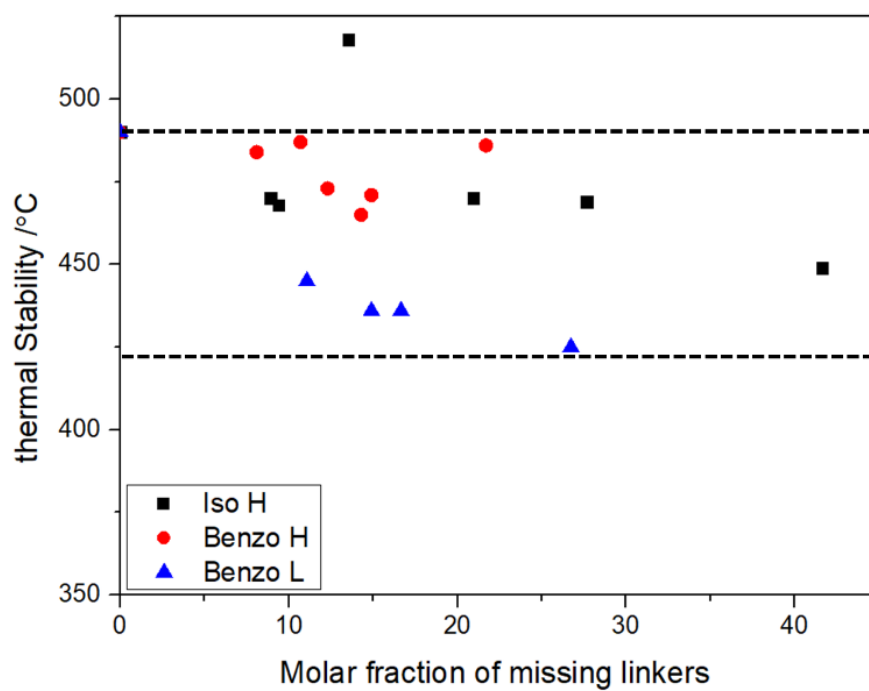

**Figure S45:** Comparison of the thermal decomposition temperature of the frameworks as a function of the molar per cent of missing linkers.



### S.11 Electronic structure

We now want to investigate the effect of the missing linker in on the electronic structure of the MUV-10. We calculated the electronic density of states (DOS) and band alignment relative to the vacuum level for pristine MUV-10 and a single missing linker defect. The normalized total DOS of pristine MUV-10 and its defect structures with incorporation of different modulators: iso and benzo are shown in **Figure S46**. Our calculation shows that the band gap variation between pristine MUV-10 and the defective structures is 0.4 eV. The electronic properties of the material vary slightly in the direction unfavorable for photocatalysis. Our calculation suggested that the impact in photocatalytic activity induced by missing linker defects will be minimal.

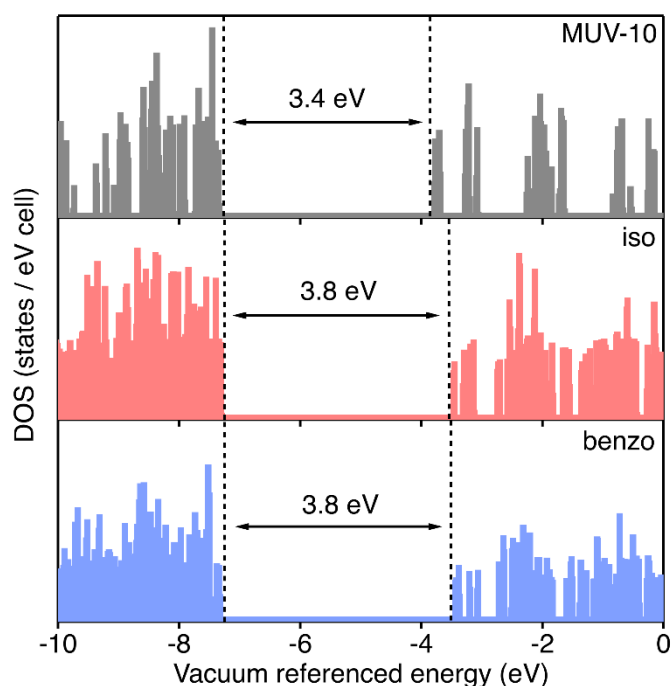

**Figure S46.** Electronic Total DOS spectra aligned relative to the vacuum level of pristine MUV-10 (top) and its defect structures with the incorporation of different modulators: iso (red) and benzo (blue).

## S.11 References

- 1 J. P. Perdew, K. Burke and M. Ernzerhof, *Phys Rev Lett*, 1996, **77**, 3865–3868.
- 2 G. Kresse and J. Furthmüller, *Comp Mater Sci*, 1996, **6**, 15–50.
- 3 G. Kresse and J. Furthmüller, *Phys Rev B*, 1996, **54**, 11169–11186.
- 4 K. Lejaeghere, G. Bihlmayer, T. Björkman, P. Blaha, S. Blügel, V. Blum, D. Caliste, I. E. Castelli, S. J. Clark, A. D. Corso, S. de Gironcoli, T. Deutsch, J. K. Dewhurst, I. D. Marco, C. Draxl, M. Dułak, O. Eriksson, J. A. Flores-Livas, K. F. Garrity, L. Genovese, P. Giannozzi, M. Giantomassi, S. Goedecker, X. Gonze, O. Grånäs, E. K. U. Gross, A. Gulans, F. Gygi, D. R. Hamann, P. J. Hasnip, N. A. W. Holzwarth, D. Iușan, D. B. Jochym, F. Jollet, D. Jones, G. Kresse, K. Koepnik, E. Küçükbenli, Y. O. Kvashnin, I. L. M. Locht, S. Lubeck, M. Marsman, N. Marzari, U. Nitzsche, L. Nordström, T. Ozaki, L. Paulatto, C. J. Pickard, W. Poelmans, M. I. J. Probert, K. Refson, M. Richter, G.-M. Rignanese, S. Saha, M. Scheffler, M. Schlipf, K. Schwarz, S. Sharma, F. Tavazza, P. Thunström, A. Tkatchenko, M. Torrent, D. Vanderbilt, M. J. van Setten, V. V. Speybroeck, J. M. Wills, J. R. Yates, G.-X. Zhang and S. Cottenier, *Science*, 2016, **351**, aad3000.
- 5 T. Bučko, S. Lebègue, J. Hafner and J. G. Ángyán, *Phys Rev B*, 2013, **87**, 064110.
- 6 J. Heyd, G. E. Scuseria and M. Ernzerhof, *J Chem Phys*, 2003, **118**, 8207–8215.
- 7 K. T. Butler, C. H. Hendon and A. Walsh, *J Am Chem Soc*, 2014, **136**, 2703–2706.
- 8 R. L. Martin, B. Smit and M. Haranczyk, *J Chem Inf Model*, 2011, **52**, 308–318.
- 9 J. Castells-Gil, N. M. Padial, N. Almora-Barrios, J. Albero, A. R. Ruiz-Salvador, J. González-Platas, H. García and C. Martí-Gastaldo, *Angewandte Chemie Int Ed*, 2018, **57**, 8453–8457.
- 10 N. M. Padial, B. Lerma-Berlanga, N. Almora-Barrios, J. Castells-Gil, I. da Silva, M. de la Mata, S. I. Molina, J. Hernández-Saz, A. E. Platero-Prats, S. Tatay and C. Martí-Gastaldo, *J Am Chem Soc*, , DOI:10.1021/jacs.0c00117.
- 11 G. C. Shearer, S. Chavan, S. Bordiga, S. Svelle, U. Olsbye and K. P. Lillerud, *Chemistry of Materials*, 2016, **28**, 3749–3761.
- 12 G. C. Shearer, S. Forselv, S. Chavan, S. Bordiga, K. Mathisen, M. Bjørgen, S. Svelle and K. P. Lillerud, *Top Catal*, 2013, **56**, 770–782.
- 13 I. A. Lázaro, *Eur J Inorg Chem*, , DOI:10.1002/ejic.202000656.
